# Supplementary material for: Identifying non-proton-coupled electron transfer as a potential limiting step for the electrosynthesis of ammonia
Source: Royal Society of Chemistry journal article supplement (doi:10.1039/d4ta03851g), 2024-01-01
Supplement: d4ta03851g1.pdf [file d4ta03851g1.pdf]

## Supporting Information

*for*

### **Identifying non-proton-coupled electron transfer as a potential limiting step for the electrosynthesis of ammonia**

Lei Yang, Jiake Fan, Weihua Zhu\*

*Institute for Computation in Molecular and Materials Science, School of Chemistry and Chemical  
Engineering, Nanjing University of Science and Technology, Nanjing 210094, China*

---

\* Corresponding authors. E-mail: [zhuwh@njust.edu.cn](mailto:zhuwh@njust.edu.cn) (Weihua Zhu).

## Methodology

**Quantum calculations.** Spin-polarized density function theory (DFT)<sup>1, 2</sup> calculations were performed using the DMol<sup>3</sup> package. A generalized gradient approximation (GGA)<sup>3, 4</sup> in the form of revised-Perdew-Burke-Ernzerhof (RPBE) functional<sup>5</sup> was utilized to account for the exchange-correlation interaction, accompanied by the DFT-D2<sup>6</sup> semi-empirical method to estimate the dispersion correction. The DFT semi-core pseudopotential (DSPP) method<sup>7</sup> for the numeric atomic orbital basis set was implemented to treat the core electron interactions. A  $\Gamma$ -centered k-point grid of  $4 \times 4 \times 1$  was employed to sample the Brillouin zone in structural relaxation, while an  $8 \times 8 \times 1$  k-point mesh was used for electronic properties calculations. The convergence tolerances of energy, force, and displacement for geometry optimization were set as  $1.0 \times 10^{-6}$  Ha,  $1.0 \times 10^{-3}$  Ha/Å, and  $5.0 \times 10^{-3}$  Å, respectively. The Gaussian smearing with a smearing width of  $5.0 \times 10^{-3}$  Ha was used to accelerate the convergence. The distance of vacuum layer in the z-direction was set to 20 Å to eliminate the interactions between periodic regions. Ab initio molecular dynamics (AIMD) simulations with NVT ensemble were conducted to evaluate the dynamic stability.

The minimum energy paths (MEP) were determined by the linear synchronous transit/quadratic synchronous transit (LST/QST) methods<sup>8</sup> with a root mean squared (RMS) convergence of  $1.0 \times 10^{-3}$  Ha/Å and further confirmed by the nudged elastic band (NEB) method<sup>9</sup>. The reaction Gibbs free energy change ( $\Delta G$ ) of the elementary steps was constructed based on the computational hydrogen electrode (CHE) theory developed by Nørskov et al.<sup>10</sup>, where the chemical potential of ( $H^+ + e^-$ ) pair in solution was equal to the half of the chemical potential of a gas-phase  $H_2$  and the reference potential was set to reversible hydrogen electrode (RHE). The corresponding  $\Delta G$  can be calculated by

$$\Delta G = \Delta E + \Delta ZPE - T\Delta S$$

where  $\Delta E$  is the total DFT energy,  $\Delta ZPE$  and  $\Delta S$  are the contributions of zero point energy and entropy to the  $\Delta G$ . In this study, the temperature  $T$  is 298.15 K. The limiting potential ( $U_L$ ) was defined as  $U_L = -\Delta G_{\max}/e$ , where  $\Delta G_{\max}$  is the free energy change of potential limiting step (PLS).

**Machine learning (ML).** The ML scheme of homemade code was accomplished within Numpy<sup>11</sup>, Pandas<sup>12</sup>, Scikit-learn<sup>13</sup>, and XGBoost<sup>14</sup> packages, as performed in the Python3 environment. Five state-of-the-art ML algorithms, namely, Support Vector Regression (SVR)<sup>15</sup>, Kernel ridge regression (KRR)<sup>16</sup>, Least Absolute Shrinkage and Selection Operator Regression (LASSO)<sup>17</sup>, Random Forest Regression (RFR)<sup>18, 19</sup>, and eXtreme Gradient Boosting Regression (XGBoost)<sup>14</sup> were employed to build the ML models. With the aid of the Optuna<sup>20</sup>, the optimal hyper-parameters were successfully searched, as available in **Table S12**. Taking the XGBoost model as an example, the `n_estimators`, `max_depth`, `min_child_weight`, `learning_rate`, `colsample_bytree`, `subsample`, `reg_alpha`, `reg_lambda` and `gamma` were considered to seek the optimal hyper-parameters using Optuna algorithm.

After normalization pre-processing<sup>21</sup>, the raw data calculated by DFT were randomly shuffled and divided into train and test sets with the ratio of 4 : 1. To avoid the risk of over-fitting, 10-fold cross validation<sup>22</sup> was executed in the process of training ML model. The values of the coefficients of determination ( $R^2$ ) and root mean square error (RMSE) were utilized to estimate the errors of five algorithms, in which  $R^2$  represents the proportion of variance that has been parsed by the independent variables in the corresponding model, while RMSE stands for the differences between the ML-predicted and DFT-calculated results. That is, a ML model endowed with better generalization ability corresponds to a smaller RMSE and larger  $R^2$ . In addition, the SHapley

Additive exPlanation (SHAP)<sup>23-25</sup> was adopted to elucidate the output of the ML models. Based on the optimal ML model, the algorithm of SHAP was used to calculate the importance of input features.

Based on the optimized adsorption configurations via DFT method, the many-body tensor representation (MBTR)<sup>26</sup> was adopted to encode the structure through the Dscribe 2.1.0<sup>27</sup>. As given in **Table S13**, the parameters were used to perform the calculation of MBTR. Then, the principal component analysis (PCA) was used to decrease the dimensionality of the dataset generated by MBTR, reducing the dimensionality to 6 and combined these data with  $Z$ ,  $X$ ,  $N$ ,  $N_d$ ,  $I_1$  and  $R_d$  as dataset for subsequent ML.

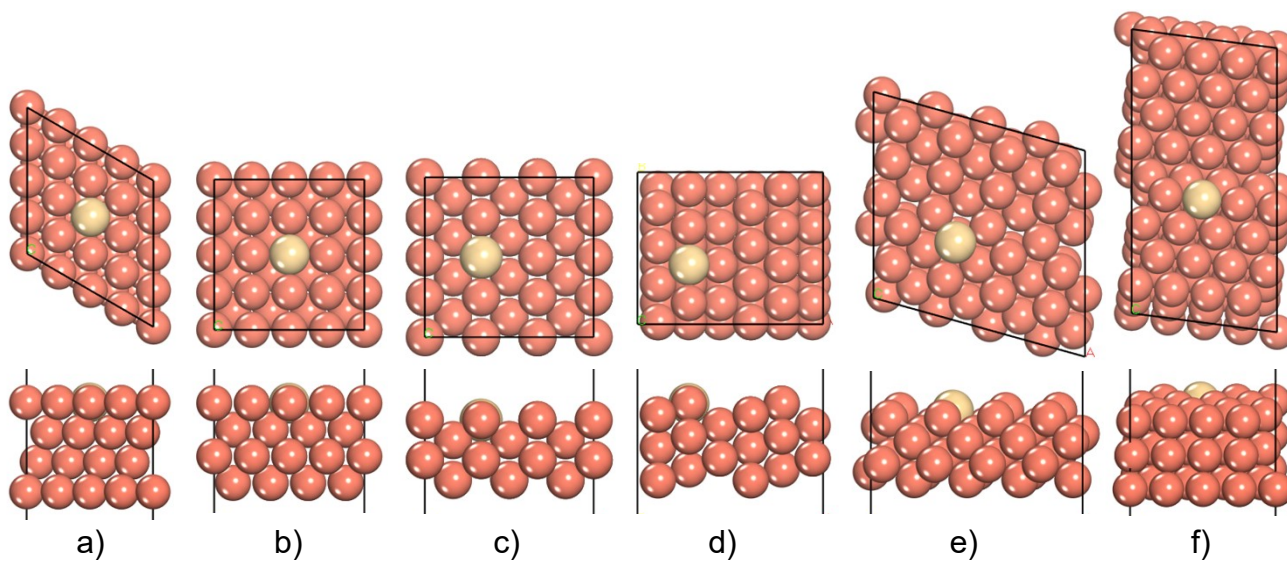

**Figure S1.** Top and side views of six optimized Cu-based configurations with different Miller index, denoted as (a) TM/Cu(111), (b) TM/Cu(100), (c) TM/Cu(110), (d) TM/Cu(211), (e) TM/Cu(320) and (f) TM/Cu(553) where the TM and Cu atoms are labeled by earthy yellow and pink, respectively.

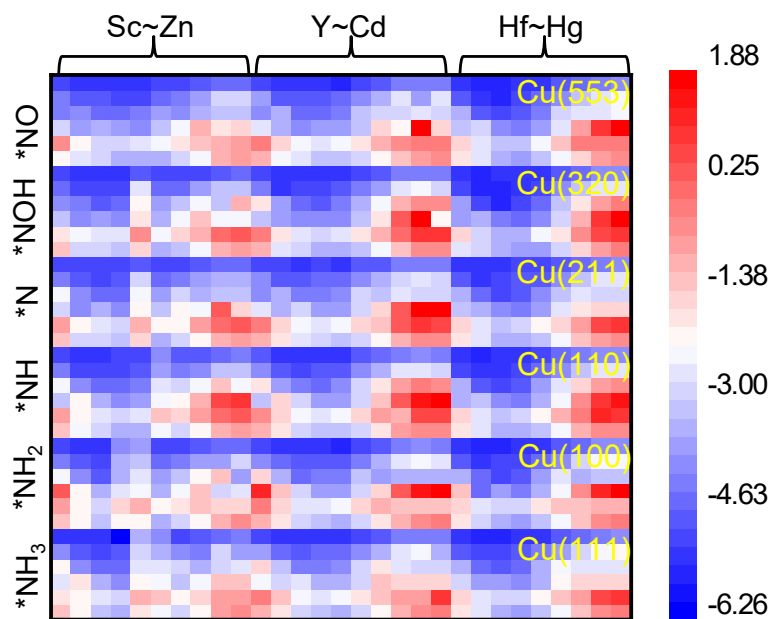

**Figure S2.** Hot spot map of adsorption free energy distribution of six different intermediates (\*NO, \*NOH, \*N, \*NH, \*NH<sub>2</sub> and \*NH<sub>3</sub>).

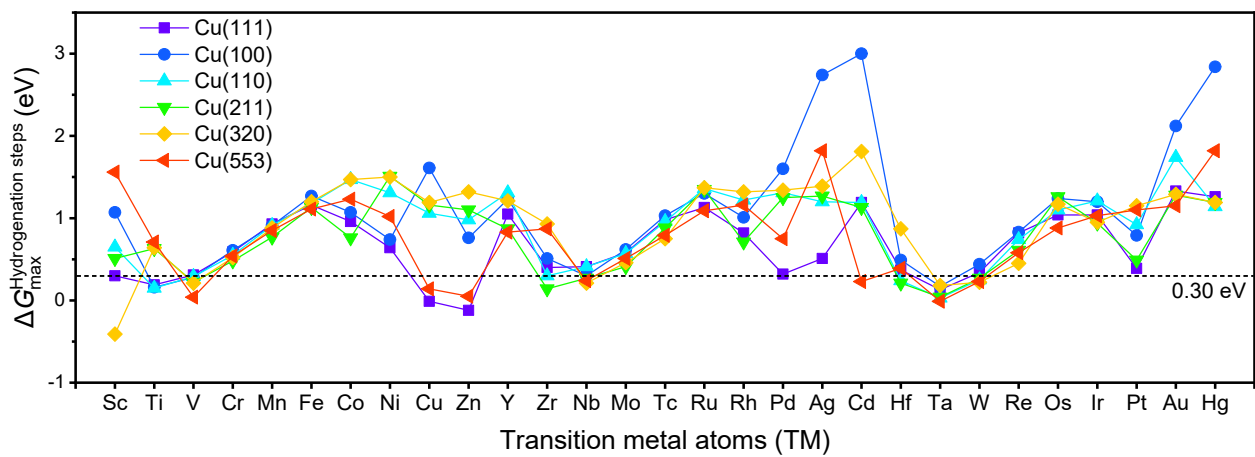

**Figure S3.** The maximum Gibbs free energy changes of all studied systems during hydrogenation steps.

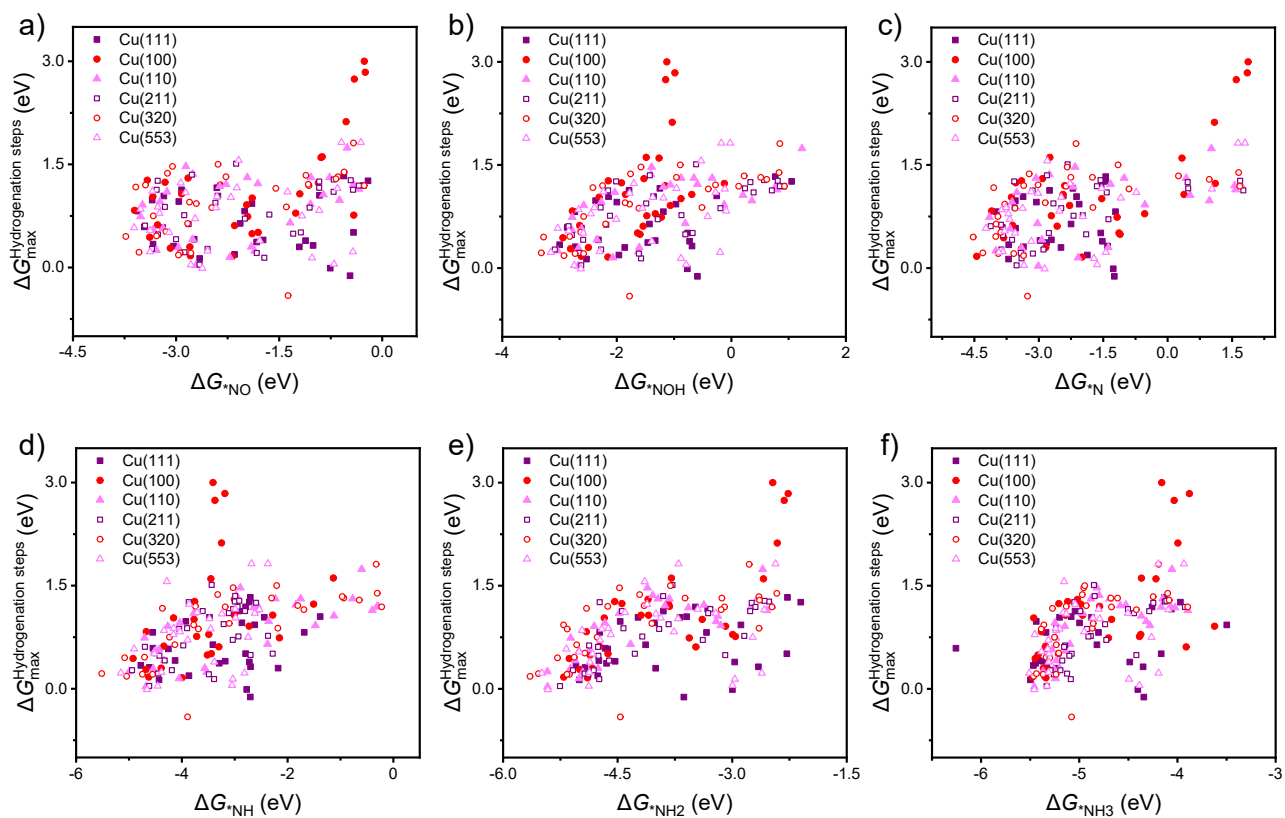

**Figure S4.** Scaling relationships of the adsorption Gibbs free energy changes of  $\Delta G^*_{\text{NO}}$  (a),  $\Delta G^*_{\text{NOH}}$  (b),  $\Delta G^*_\text{N}$  (c),  $\Delta G^*_{\text{NH}}$  (d),  $\Delta G^*_{\text{NH}_2}$  (e), and  $\Delta G^*_{\text{NH}_3}$  (f) as a function of the maximum Gibbs free energy changes of all studied systems during hydrogenation steps.



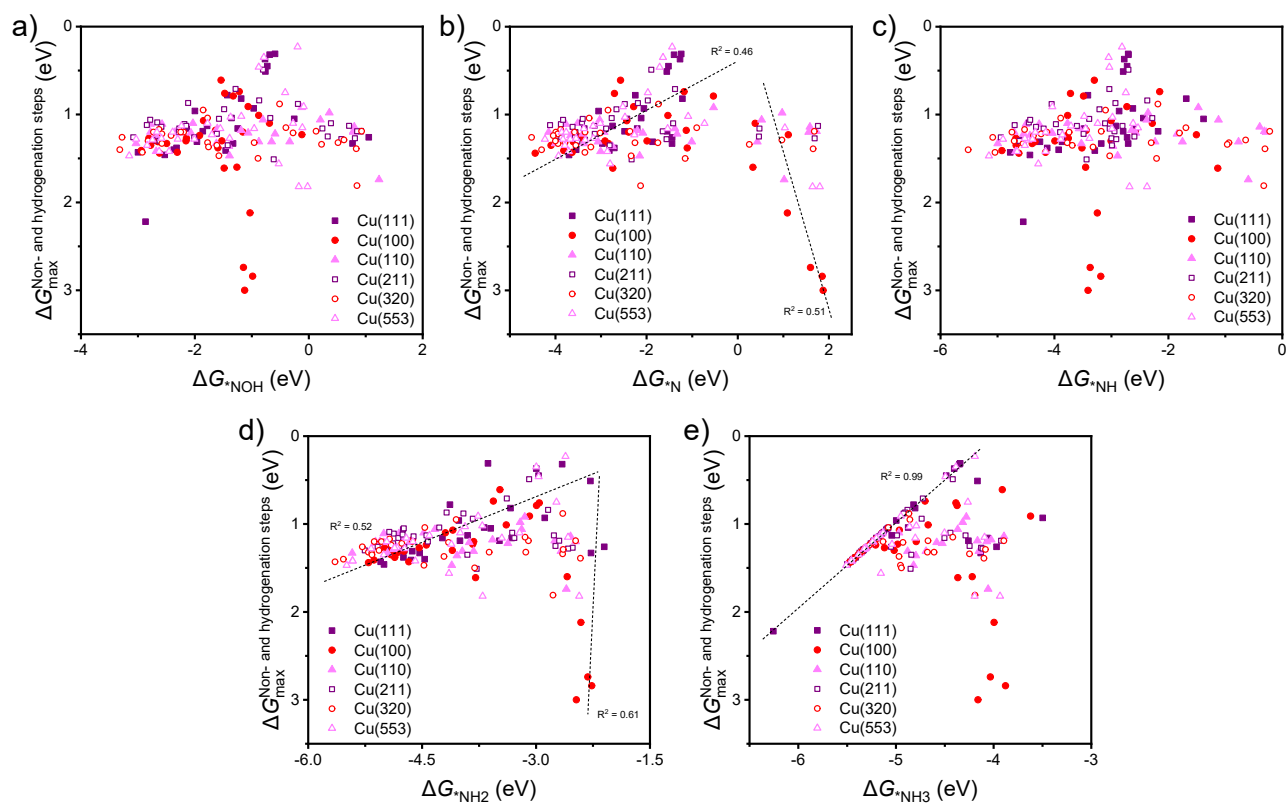

**Figure S5.** Scaling relationships of the adsorption Gibbs free energy changes of  $\Delta G^*_{\text{NOH}}$  (a),  $\Delta G^*_{\text{N}}$  (b),  $\Delta G^*_{\text{NH}}$  (c),  $\Delta G^*_{\text{NH}_2}$  (d), and  $\Delta G^*_{\text{NH}_3}$  (e) as a function of the maximum Gibbs free energy changes of all studied systems during non- and hydrogenation steps.

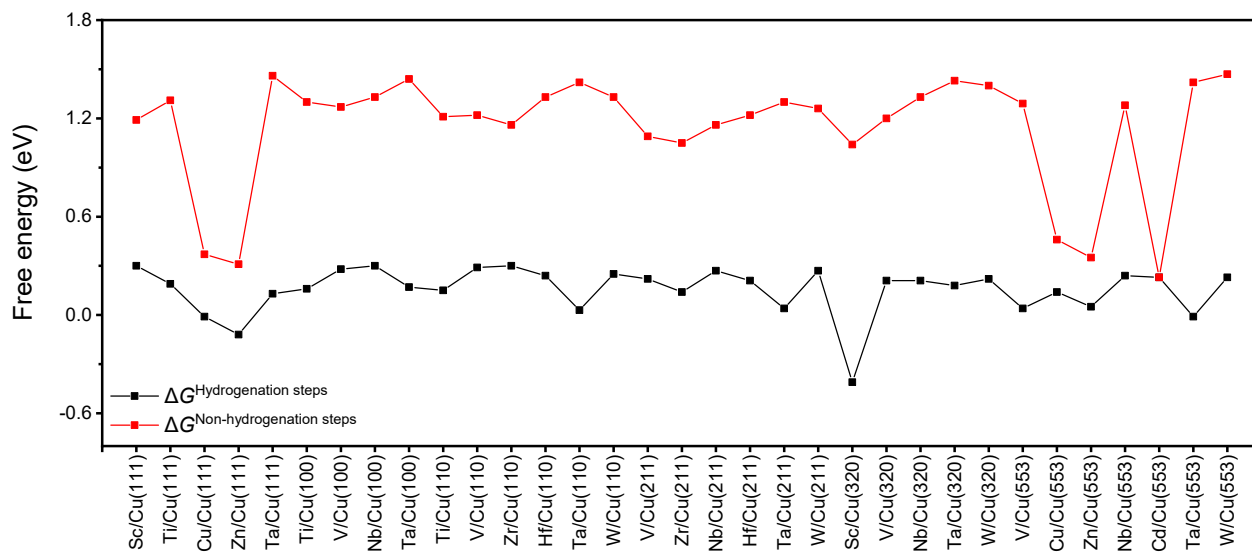

**Figure S6.** The difference in maximum Gibbs free energy changes of 33 screened catalysts when considering hydrogenation and non-hydrogenation steps.

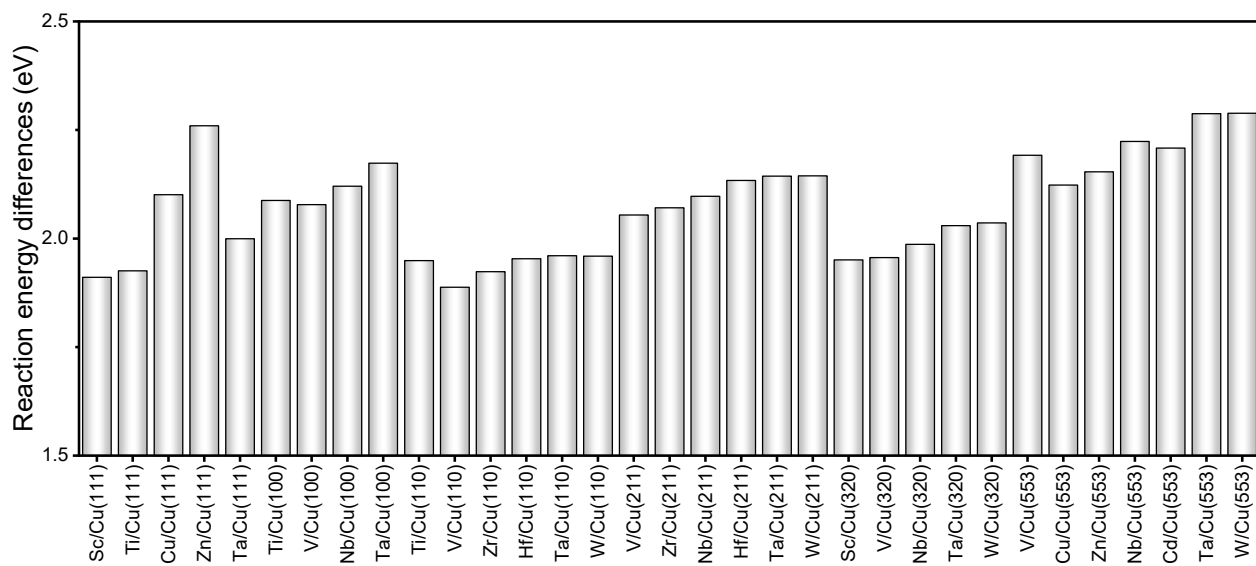

**Figure S7.** Reaction energy differences between  $^*\text{NH}_3 + \text{H}_5\text{O}_2^+ \rightarrow ^* + \text{NH}_4^+ + 2\text{H}_2\text{O}$  and  $^*\text{NH}_3 + \text{H}_5\text{O}_2^+ \rightarrow ^* + \text{NH}_3 + \text{H}_5\text{O}_2^+$  of 33 screened catalysts.



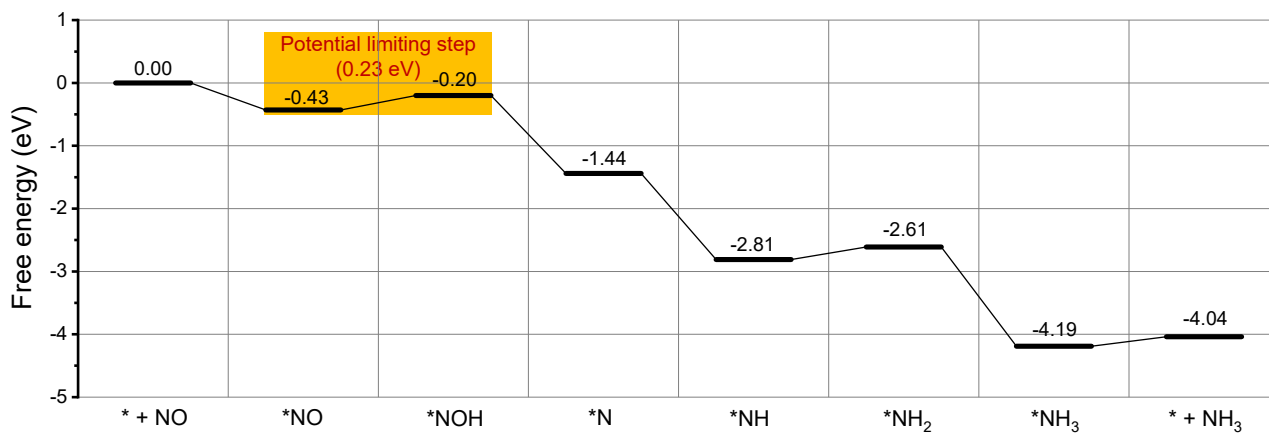

**Figure S9.** Gibbs free energy profile of O-distal mechanism on Cd/Cu(553) at  $U = 0$  V.

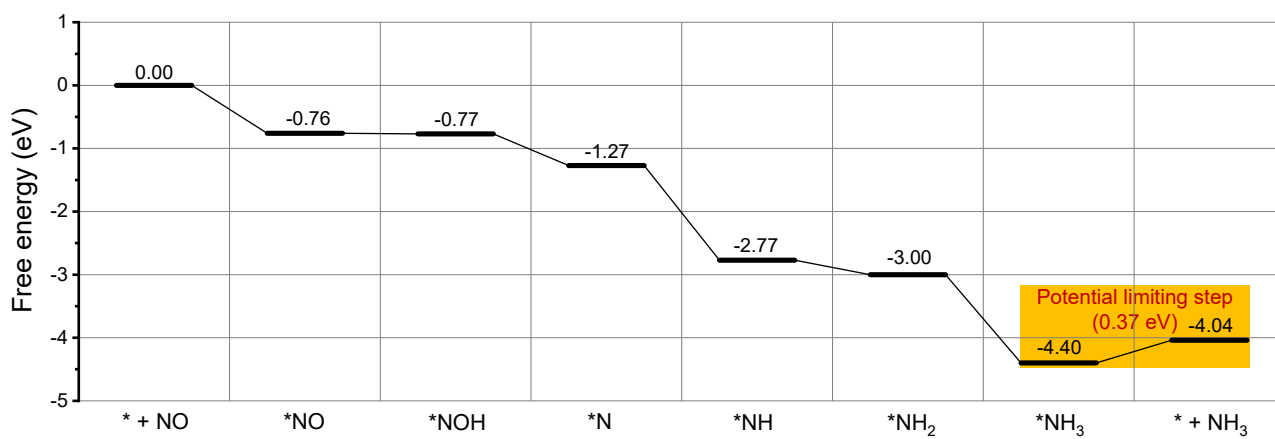

**Figure S10.** Gibbs free energy profile of O-distal mechanism on Cu/Cu(111) at  $U = 0$  V.

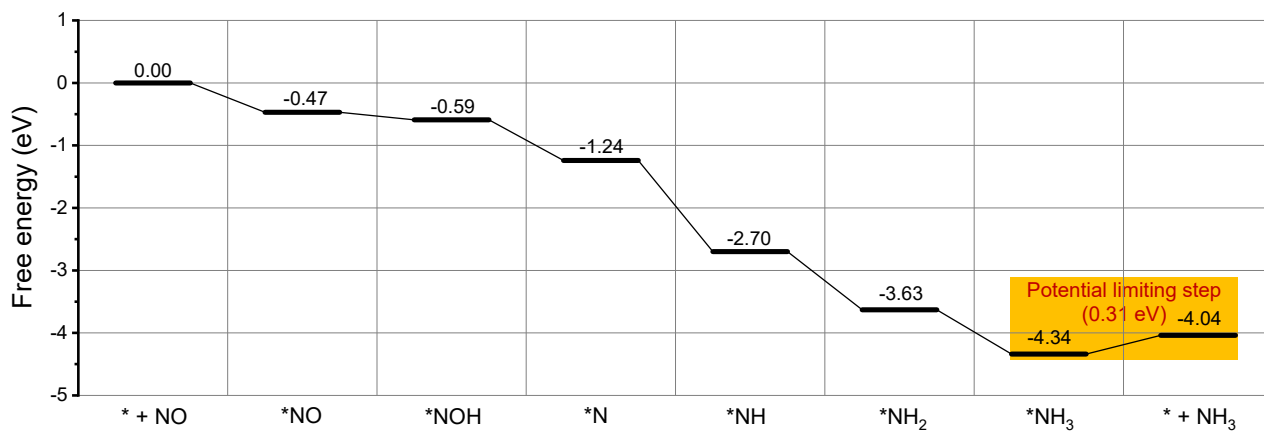

**Figure S11.** Gibbs free energy profile of O-distal mechanism on Zn/Cu(111) at  $U = 0$  V.

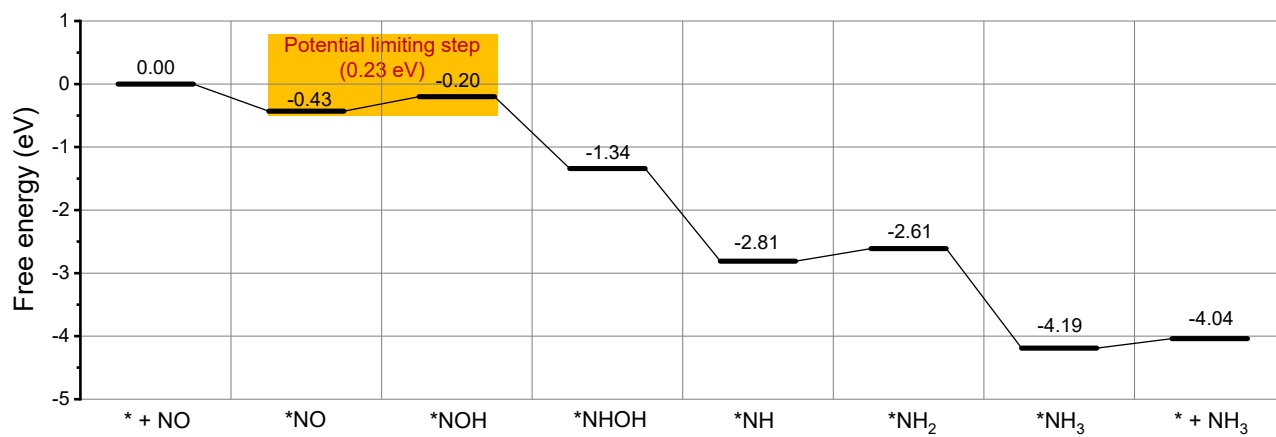

**Figure S12.** Gibbs free energy profile of O-alternative mechanism on Cd/Cu(553) at  $U = 0$  V.



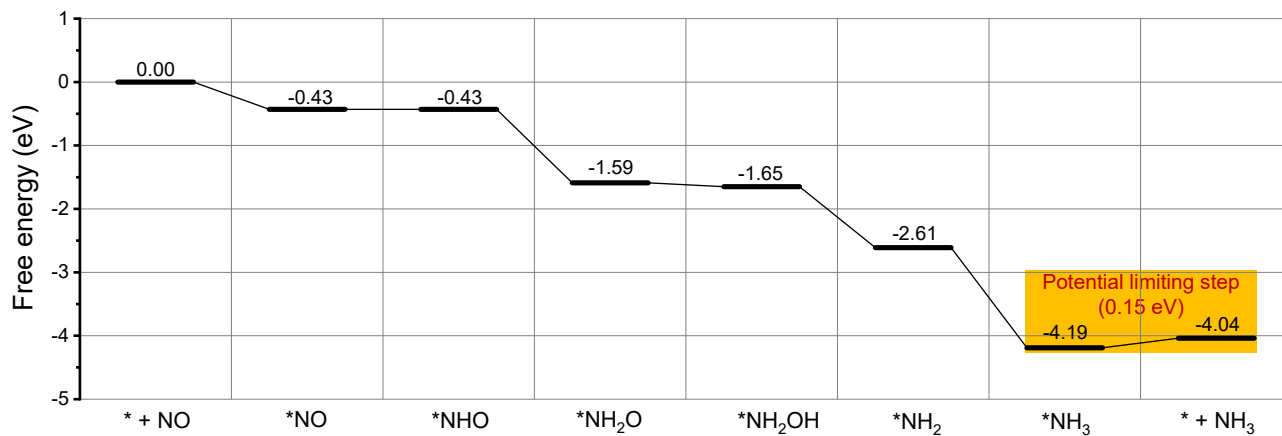

**Figure S13.** Gibbs free energy profile of N-distal mechanism on Cd/Cu(553) at  $U = 0$  V.

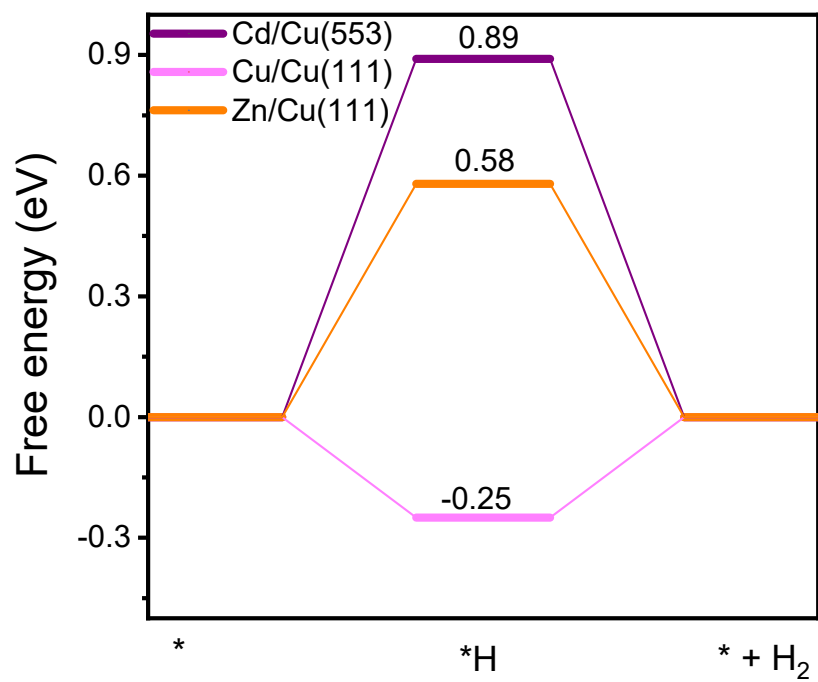

**Figure S14.** Gibbs free energy profile of HER at  $U = 0$  V.

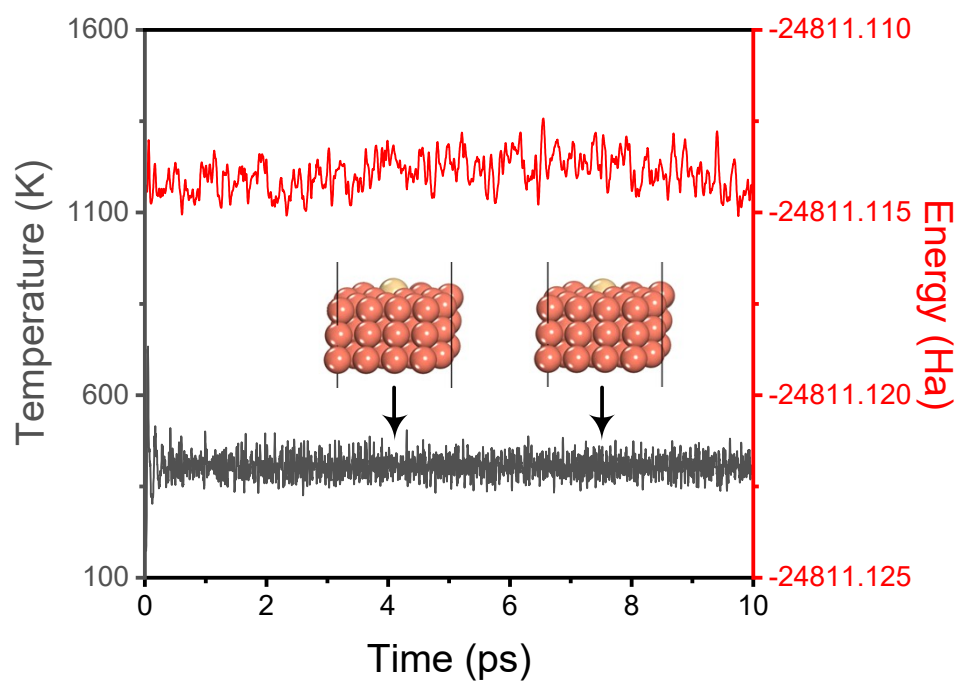

**Figure S15.** Temperature and total energy changes during AIMD simulations within 10 ps under 400 K for Cd/Cu(553), of which the snapshots at 4.0 and 7.5 ps are inset.

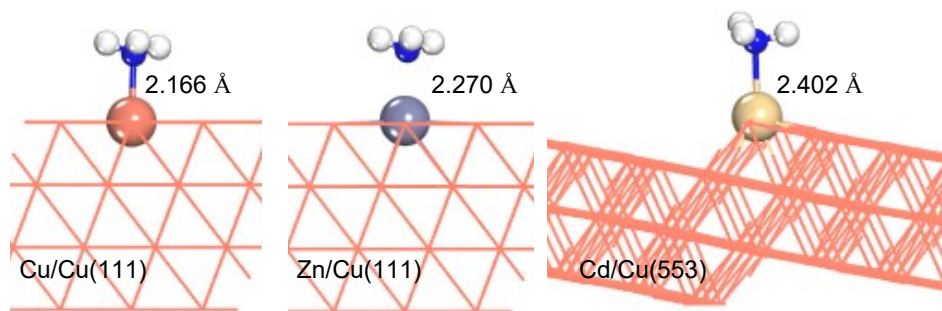

**Figure S16.** The optimized \*NH<sub>3</sub> configurations of Cu/Cu(111), Zn/Cu(111) and Cd/Cu(553), where the bond lengths of TM-N are marked inset, respectively.

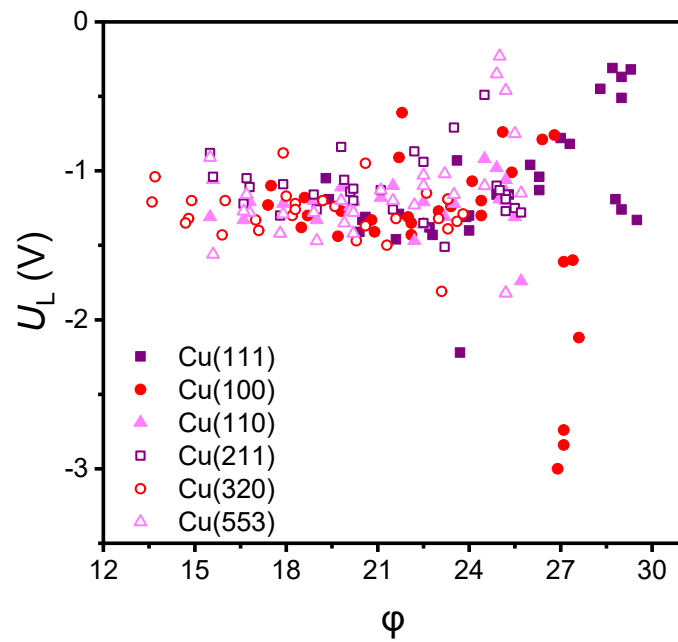

**Figure S17.** Scaling relationships of the descriptor  $\phi$  (proposed by Wang et al.<sup>28</sup>) as a function of the  $U_L$ .

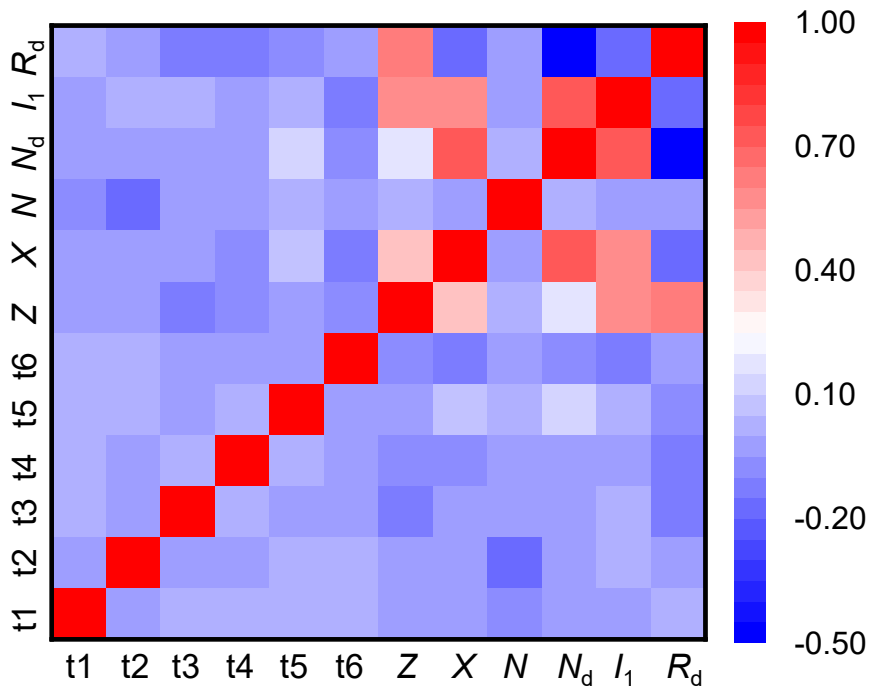

**Figure S18.** Pearson correlation coefficient matrix analysis for the 12 features selected for the ML analysis.

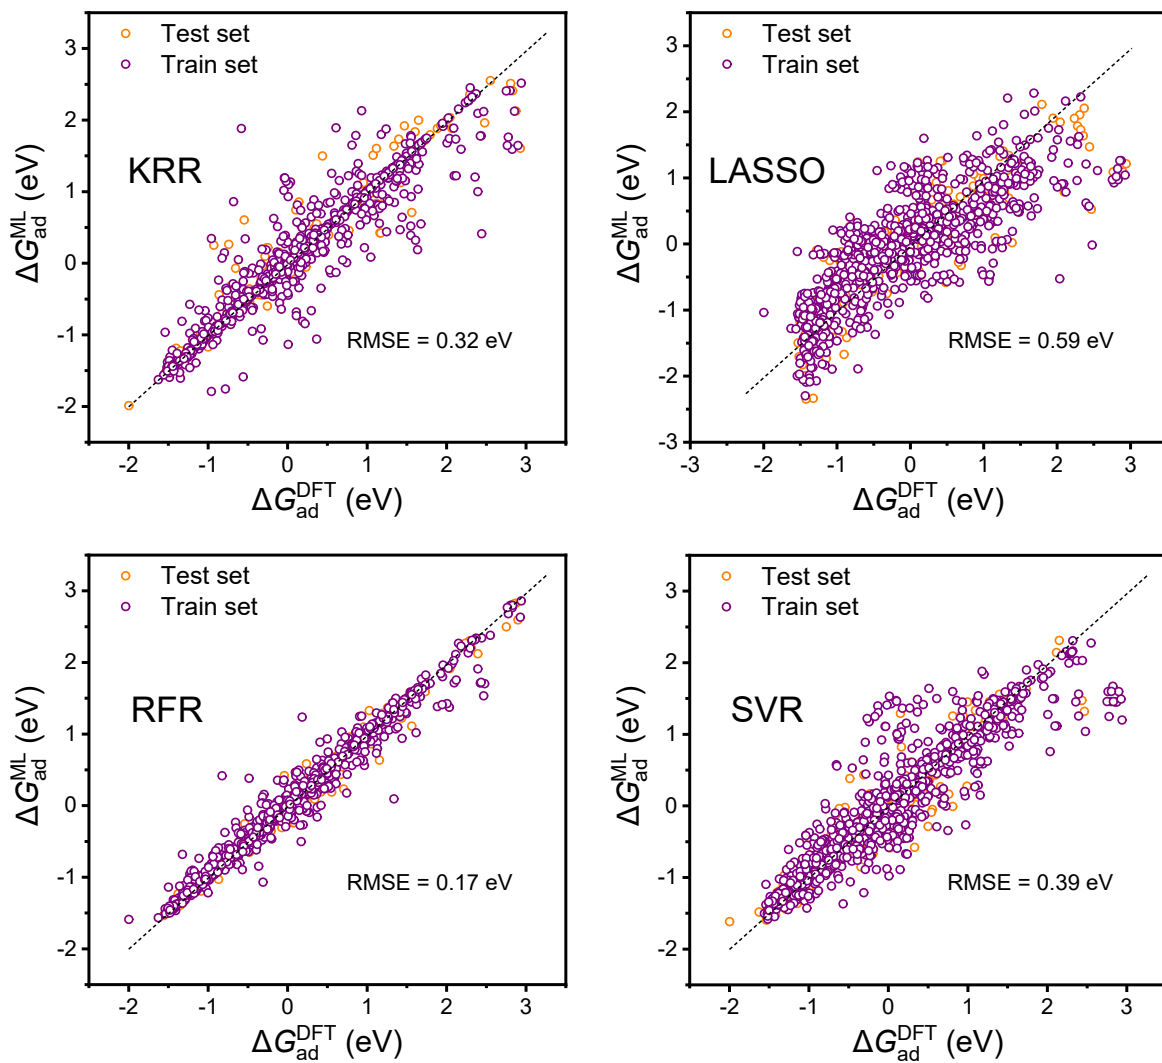

**Figure S19.** Comparison of DFT calculated  $\Delta G_{\text{ads}}$  values with those predicted by ML methods.

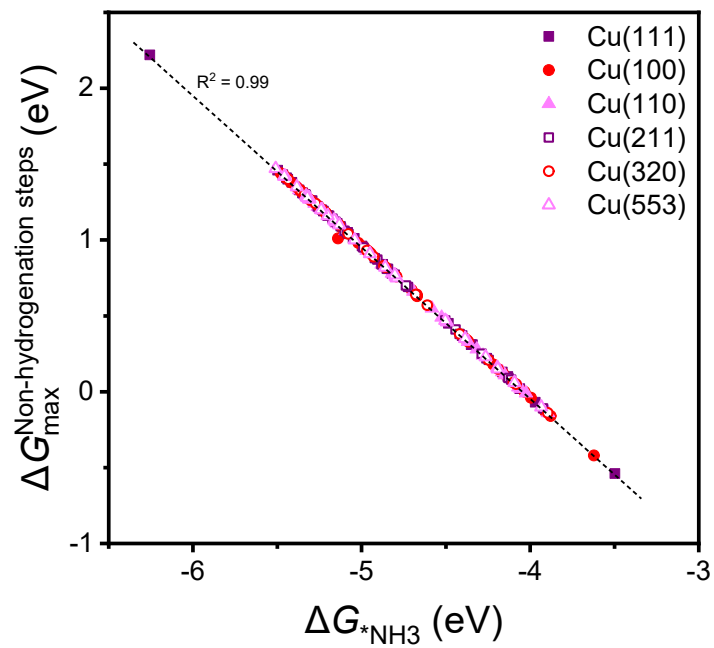

**Figure S20.** Scaling relationships of the adsorption Gibbs free energy changes of  $\Delta G_{\text{NH}_3}^*$  as a function of the maximum Gibbs free energy changes of all studied systems during non-hydrogenation steps.



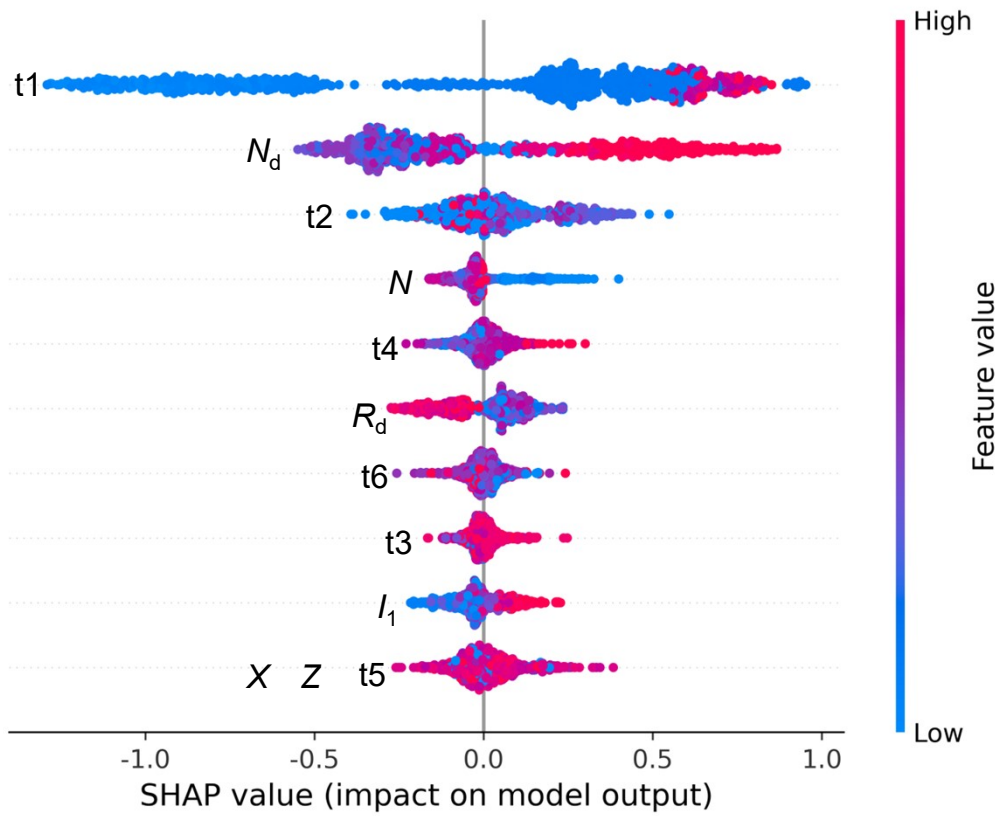

**Figure S21.** Beeswarm graph of each sample under the XGBoost model. The color scale corresponds to the feature values. Red and blue colors represent the large and small feature values, respectively.

**Table S1.** The lattice parameters of six optimized Cu-based structures with different Miller index.

|       | Cu(111) | Cu(100) | Cu(110) | Cu(211) | Cu(320) | Cu(553) |
|-------|---------|---------|---------|---------|---------|---------|
| a (Å) | 10.5172 | 10.5172 | 11.1552 | 12.8809 | 14.8736 | 10.5172 |
| b (Å) | 10.5172 | 10.5172 | 10.5172 | 10.5172 | 13.9130 | 20.3665 |
| c (Å) | 26.4405 | 25.5776 | 23.9440 | 25.3131 | 24.6408 | 26.2932 |

**Table S2.** Formation energies of all SAA catalysts (eV).

| TM | Cu(111) | Cu(100) | Cu(110) | Cu(211) | Cu(320) | Cu(553) |
|----|---------|---------|---------|---------|---------|---------|
| Sc | -5.72   | -5.29   | -4.89   | -3.91   | -2.34   | -1.47   |
| Ti | -6.27   | -5.84   | -4.95   | -4.44   | -3.20   | -3.72   |
| V  | -6.01   | -5.53   | -4.35   | -4.13   | -3.22   | -4.46   |
| Cr | -2.71   | -3.69   | -1.88   | -0.83   | 0.95    | 1.27    |
| Mn | -4.24   | -3.86   | -1.84   | -2.54   | -1.09   | 1.53    |
| Fe | -4.33   | -2.94   | -3.42   | -1.64   | -0.29   | -0.38   |
| Co | -5.62   | -5.18   | -4.34   | -3.97   | -3.25   | -4.11   |
| Ni | -7.27   | -6.79   | -5.84   | -5.55   | -4.91   | -5.67   |
| Cu | -7.35   | -6.82   | -5.98   | -5.85   | -5.48   | -5.93   |
| Zn | -7.71   | -7.12   | -6.30   | -6.22   | -6.01   | -6.35   |
| Y  | -8.13   | -7.81   | -6.91   | -6.45   | -5.43   | -5.61   |
| Zr | -5.74   | -5.33   | -4.75   | -3.72   | -1.88   | -1.48   |
| Nb | -8.09   | -7.48   | -6.04   | -5.77   | -4.52   | -6.10   |
| Mo | -5.37   | -4.89   | -3.85   | -3.11   | -1.43   | -2.18   |
| Tc | -4.61   | -4.21   | -3.41   | -2.19   | -0.03   | -0.09   |
| Ru | -3.41   | -3.22   | -2.88   | -1.62   | 0.32    | 0.62    |
| Rh | -5.39   | -5.11   | -4.63   | -3.72   | -2.31   | -2.42   |
| Pd | -6.38   | -6.06   | -5.46   | -5.18   | -4.72   | -5.29   |
| Ag | -7.46   | -6.98   | -6.16   | -6.00   | -5.62   | -6.10   |
| Cd | -7.86   | -7.34   | -6.46   | -6.35   | -6.12   | -6.50   |

|    |       |       |       |       |       |       |
|----|-------|-------|-------|-------|-------|-------|
| Hf | -6.78 | -6.13 | -5.56 | -4.56 | -2.69 | -2.33 |
| Ta | -8.39 | -7.68 | -6.25 | -6.08 | -4.85 | -6.59 |
| W  | -4.75 | -4.20 | -3.20 | -2.50 | -0.78 | -1.58 |
| Re | -2.95 | -2.59 | -2.05 | -0.85 | 1.23  | 1.22  |
| Os | -3.21 | -2.93 | -2.52 | -1.25 | 0.83  | 0.98  |
| Ir | -4.43 | -4.12 | -3.73 | -2.78 | -1.34 | -1.52 |
| Pt | -7.74 | -7.23 | -6.42 | -6.06 | -5.38 | -6.21 |
| Au | -7.60 | -7.07 | -6.32 | -6.13 | -5.76 | -6.28 |
| Hg | -3.31 | -2.91 | -2.57 | -2.02 | -1.33 | -0.78 |

---

\*Formation energy ( $E_f$ ),  $E_f = E_{\text{catalyst}} - E_v - E_m$  where  $E_{\text{catalyst}}$ ,  $E_v$ , and  $E_m$  represent the DFT energy of SAA catalyst, the DFT energy of SAA catalyst with a TM vacancy, and the DFT energy of a TM atom in their corresponding metal bulk, respectively.

**Table S3.** Gibbs free energy changes of NORR on TM/Cu(111).

|    | $\Delta G^*_{\text{NO}}$ | $\Delta G^*_{\text{NOH}}$ | $\Delta G^*_{\text{N}}$ | $\Delta G^*_{\text{NH}}$ | $\Delta G^*_{\text{NH}_2}$ | $\Delta G^*_{\text{NH}_3}$ | NH <sub>3</sub> desorption |
|----|--------------------------|---------------------------|-------------------------|--------------------------|----------------------------|----------------------------|----------------------------|
| Sc | -1.21                    | -0.65                     | -0.62                   | 0.30                     | -1.82                      | -1.22                      | 1.19                       |
| Ti | -2.15                    | 0.19                      | 0.09                    | -2.00                    | -0.89                      | -0.59                      | 1.31                       |
| V  | -3.04                    | 0.31                      | -0.64                   | -1.26                    | -0.31                      | -0.40                      | 1.29                       |
| Cr | -3.46                    | 0.59                      | -0.98                   | -0.70                    | -0.12                      | -1.59                      | 2.22                       |
| Mn | -1.89                    | 0.93                      | -1.09                   | -0.56                    | -0.26                      | -0.61                      | -0.54                      |
| Fe | -2.41                    | 1.16                      | -0.96                   | -0.37                    | -0.75                      | -0.74                      | 0.02                       |
| Co | -2.96                    | 0.96                      | -1.06                   | 0.19                     | -1.15                      | -0.98                      | 0.96                       |
| Ni | -2.07                    | 0.64                      | -0.82                   | -1.17                    | -0.72                      | -0.69                      | 0.78                       |
| Cu | -0.76                    | -0.01                     | -0.50                   | -1.51                    | -0.22                      | -1.41                      | 0.37                       |
| Zn | -0.47                    | -0.12                     | -0.65                   | -1.46                    | -0.93                      | -0.71                      | 0.31                       |
| Y  | -0.91                    | 0.66                      | -2.18                   | 1.05                     | -2.21                      | -1.49                      | 1.05                       |
| Zr | -1.73                    | 0.40                      | -1.64                   | -0.21                    | -1.35                      | -0.84                      | 1.33                       |
| Nb | -2.74                    | 0.41                      | -0.38                   | -1.42                    | -0.62                      | -0.67                      | 1.38                       |
| Mo | -3.19                    | 0.58                      | -0.92                   | -0.71                    | -0.38                      | -0.72                      | 1.31                       |
| Tc | -3.35                    | 0.98                      | -1.18                   | -0.38                    | -0.54                      | -0.97                      | 1.40                       |
| Ru | -2.92                    | 1.13                      | -0.96                   | -0.18                    | -0.98                      | -1.14                      | 1.01                       |
| Rh | -2.00                    | 0.82                      | -0.03                   | -0.47                    | -1.65                      | -1.47                      | 0.77                       |
| Pd | -1.01                    | 0.32                      | -0.71                   | -1.30                    | 0.04                       | -1.69                      | 0.31                       |
| Ag | -0.42                    | -0.34                     | -0.80                   | -1.24                    | 0.51                       | -1.88                      | 0.13                       |
| Cd | -0.27                    | 1.19                      | -2.46                   | -1.24                    | -0.69                      | -0.78                      | 0.22                       |

|    |       |      |       |       |       |       |       |
|----|-------|------|-------|-------|-------|-------|-------|
| Hf | -1.83 | 0.37 | -1.36 | -0.47 | -1.35 | -0.80 | 1.41  |
| Ta | -2.66 | 0.13 | -1.17 | -0.73 | -0.57 | -0.49 | 1.46  |
| W  | -3.33 | 0.34 | -0.70 | -1.08 | -0.27 | -0.42 | 1.43  |
| Re | -3.55 | 0.82 | -1.25 | -0.57 | -0.18 | -0.60 | 1.30  |
| Os | -3.18 | 1.04 | -1.22 | -0.11 | -0.76 | -0.97 | 1.16  |
| Ir | -2.39 | 1.04 | -0.76 | -0.32 | -1.24 | -1.19 | 0.84  |
| Pt | -1.12 | 0.39 | -0.79 | -1.21 | -0.24 | -1.52 | 0.45  |
| Au | -0.56 | 1.33 | -2.21 | -1.26 | 0.43  | -1.86 | 0.10  |
| Hg | -0.21 | 1.26 | -2.49 | -1.28 | 0.62  | -1.87 | -0.07 |

---

**Table S4.** Gibbs free energy changes of NORR on TM/Cu(100).

|    | $\Delta G^*_{\text{NO}}$ | $\Delta G^*_{\text{NOH}}$ | $\Delta G^*_{\text{N}}$ | $\Delta G^*_{\text{NH}}$ | $\Delta G^*_{\text{NH}_2}$ | $\Delta G^*_{\text{NH}_3}$ | NH <sub>3</sub> desorption |
|----|--------------------------|---------------------------|-------------------------|--------------------------|----------------------------|----------------------------|----------------------------|
| Sc | -1.20                    | 0.51                      | 1.07                    | -2.66                    | -1.91                      | -0.95                      | 1.01                       |
| Ti | -2.18                    | 0.03                      | 0.16                    | -2.00                    | -0.90                      | -0.45                      | 1.30                       |
| V  | -3.08                    | 0.28                      | -0.60                   | -1.27                    | -0.32                      | -0.32                      | 1.27                       |
| Cr | -2.15                    | 0.61                      | -1.03                   | -0.73                    | -0.18                      | -0.44                      | -0.13                      |
| Mn | -1.97                    | 0.91                      | -1.22                   | -0.45                    | -0.36                      | -0.54                      | -0.42                      |
| Fe | -3.42                    | 1.27                      | -1.25                   | -0.35                    | -0.78                      | -0.58                      | 1.08                       |
| Co | -2.92                    | 1.07                      | -0.59                   | -0.57                    | -1.09                      | -0.87                      | 0.93                       |
| Ni | -1.96                    | 0.74                      | 0.04                    | -0.98                    | -1.41                      | -1.14                      | 0.67                       |
| Cu | -0.87                    | -0.61                     | -1.26                   | 1.61                     | -2.66                      | -0.57                      | 0.33                       |
| Zn | -0.41                    | -1.06                     | -1.23                   | -1.01                    | 0.76                       | -1.43                      | 0.35                       |
| Y  | -0.93                    | 0.81                      | 1.23                    | -2.62                    | -2.33                      | -1.15                      | 0.95                       |
| Zr | -1.80                    | 0.17                      | 0.51                    | -2.31                    | -1.18                      | -0.59                      | 1.18                       |
| Nb | -2.80                    | 0.30                      | -0.34                   | -1.55                    | -0.44                      | -0.53                      | 1.33                       |
| Mo | -3.27                    | 0.62                      | -0.96                   | -0.73                    | -0.40                      | -0.61                      | 1.31                       |
| Tc | -3.34                    | 1.03                      | -1.33                   | -0.52                    | -0.52                      | -0.79                      | 1.43                       |
| Ru | -2.82                    | 1.30                      | -1.39                   | -0.09                    | -1.10                      | -0.92                      | 0.98                       |
| Rh | -1.89                    | 1.01                      | -0.66                   | -2.23                    | 0.38                       | -1.28                      | 0.63                       |
| Pd | -0.89                    | -0.37                     | 1.60                    | -3.79                    | 0.86                       | -1.63                      | 0.18                       |
| Ag | -0.41                    | -0.74                     | 2.74                    | -4.97                    | 1.06                       | -1.72                      | 0.00                       |
| Cd | -0.26                    | -0.87                     | 3.00                    | -5.29                    | 0.94                       | -1.69                      | 0.12                       |

|    |       |       |       |       |       |       |       |
|----|-------|-------|-------|-------|-------|-------|-------|
| Hf | -1.89 | 0.30  | 0.49  | -2.41 | -1.34 | -0.56 | 1.38  |
| Ta | -2.79 | 0.17  | -1.82 | -0.18 | -0.58 | -0.27 | 1.44  |
| W  | -3.38 | 0.44  | -0.88 | -1.10 | -0.21 | -0.32 | 1.41  |
| Re | -3.60 | 0.83  | -1.32 | -0.58 | -0.24 | -0.48 | 1.35  |
| Os | -3.16 | 1.24  | -1.62 | -0.25 | -0.66 | -0.76 | 1.17  |
| Ir | -2.36 | 1.20  | -1.24 | -0.19 | -1.24 | -0.97 | 0.76  |
| Pt | -1.26 | -0.07 | 0.79  | -2.96 | 0.50  | -1.38 | 0.34  |
| Au | -0.53 | -0.50 | 2.12  | -4.34 | 0.84  | -1.58 | -0.04 |
| Hg | -0.25 | -0.74 | 2.84  | -5.04 | 0.92  | -1.61 | -0.16 |

---



**Table S5.** Gibbs free energy changes of NORR on TM/Cu(110).

|    | $\Delta G^*_{\text{NO}}$ | $\Delta G^*_{\text{NOH}}$ | $\Delta G^*_{\text{N}}$ | $\Delta G^*_{\text{NH}}$ | $\Delta G^*_{\text{NH}_2}$ | $\Delta G^*_{\text{NH}_3}$ | NH <sub>3</sub> desorption |
|----|--------------------------|---------------------------|-------------------------|--------------------------|----------------------------|----------------------------|----------------------------|
| Sc | -1.34                    | 0.54                      | -2.23                   | 0.65                     | -1.95                      | -0.76                      | 1.06                       |
| Ti | -2.22                    | 0.15                      | -0.01                   | -1.97                    | -0.95                      | -0.24                      | 1.21                       |
| V  | -2.97                    | 0.29                      | -0.73                   | -1.14                    | -0.58                      | -0.14                      | 1.22                       |
| Cr | -3.33                    | 0.55                      | -1.06                   | -0.66                    | -0.50                      | -0.14                      | 1.11                       |
| Mn | -3.49                    | 0.91                      | -1.19                   | -0.50                    | -0.54                      | -0.34                      | 1.11                       |
| Fe | -2.36                    | 1.18                      | -1.01                   | -0.45                    | -0.93                      | -0.45                      | -0.01                      |
| Co | -2.86                    | 1.47                      | -0.76                   | -0.74                    | -1.22                      | -0.71                      | 0.78                       |
| Ni | -1.96                    | 1.31                      | -0.36                   | -1.22                    | -1.59                      | -0.87                      | 0.66                       |
| Cu | -0.86                    | 1.06                      | 0.32                    | -1.64                    | -2.07                      | -1.18                      | 0.33                       |
| Zn | -0.62                    | 0.98                      | 0.61                    | -3.33                    | -0.85                      | -1.11                      | 0.28                       |
| Y  | -1.04                    | 0.70                      | -2.73                   | 1.31                     | -2.22                      | -0.91                      | 0.84                       |
| Zr | -1.91                    | 0.30                      | 0.23                    | -2.19                    | -1.19                      | -0.44                      | 1.16                       |
| Nb | -2.76                    | 0.41                      | -0.58                   | -1.40                    | -0.72                      | -0.18                      | 1.2                        |
| Mo | -3.19                    | 0.57                      | -1.05                   | -0.76                    | -0.43                      | -0.42                      | 1.24                       |
| Tc | -3.23                    | 0.96                      | -1.35                   | -0.42                    | -0.63                      | -0.58                      | 1.21                       |
| Ru | -2.76                    | 1.36                      | -1.35                   | -0.22                    | -1.07                      | -0.76                      | 0.76                       |
| Rh | -1.81                    | 1.22                      | -0.74                   | -0.52                    | -1.52                      | -1.16                      | 0.49                       |
| Pd | -0.77                    | -0.11                     | 1.31                    | -1.20                    | -1.90                      | -1.48                      | 0.11                       |
| Ag | -0.42                    | 1.20                      | 0.78                    | -1.84                    | -2.20                      | -1.59                      | 0.03                       |
| Cd | -0.41                    | 1.19                      | 0.94                    | -2.04                    | -2.44                      | -1.41                      | 0.13                       |

|    |       |      |       |       |       |       |       |
|----|-------|------|-------|-------|-------|-------|-------|
| Hf | -1.86 | 0.24 | -1.75 | -0.16 | -1.43 | -0.41 | 1.33  |
| Ta | -2.71 | 0.03 | -0.33 | -1.67 | -0.74 | -0.04 | 1.42  |
| W  | -3.29 | 0.25 | -0.97 | -0.99 | -0.43 | 0.05  | 1.33  |
| Re | -3.52 | 0.74 | -1.37 | -0.56 | -0.41 | -0.12 | 1.2   |
| Os | -3.13 | 1.10 | -1.48 | -0.26 | -0.71 | -0.49 | 0.93  |
| Ir | -2.27 | 1.21 | -1.21 | -0.30 | -1.31 | -0.70 | 0.55  |
| Pt | -1.04 | 0.92 | -0.40 | -0.94 | -1.68 | -1.13 | 0.24  |
| Au | -0.51 | 1.74 | -0.21 | -1.62 | -2.00 | -1.46 | 0.02  |
| Hg | -0.34 | 1.14 | 0.78  | -1.98 | -2.15 | -1.35 | -0.14 |

---

**Table S6.** Gibbs free energy changes of NORR on TM/Cu(211).

|    | $\Delta G^*_{\text{NO}}$ | $\Delta G^*_{\text{NOH}}$ | $\Delta G^*_{\text{N}}$ | $\Delta G^*_{\text{NH}}$ | $\Delta G^*_{\text{NH}_2}$ | $\Delta G^*_{\text{NH}_3}$ | NH <sub>3</sub> desorption |
|----|--------------------------|---------------------------|-------------------------|--------------------------|----------------------------|----------------------------|----------------------------|
| Sc | -1.18                    | 0.51                      | -2.09                   | 0.48                     | -1.99                      | -0.80                      | 1.04                       |
| Ti | -2.82                    | 0.63                      | -1.70                   | -0.09                    | -0.90                      | -0.27                      | 1.11                       |
| V  | -2.88                    | 0.22                      | -0.76                   | -1.03                    | -0.48                      | -0.19                      | 1.09                       |
| Cr | -3.26                    | 0.48                      | -1.05                   | -0.59                    | -0.33                      | -0.35                      | 1.06                       |
| Mn | -1.64                    | 0.77                      | -1.10                   | -0.40                    | -0.47                      | -2.04                      | 0.84                       |
| Fe | -3.28                    | 1.13                      | -0.99                   | -0.46                    | -0.84                      | -0.55                      | 0.95                       |
| Co | -2.88                    | 0.76                      | -0.07                   | -0.74                    | -1.25                      | -0.73                      | 0.87                       |
| Ni | -2.13                    | 1.51                      | -1.71                   | -1.11                    | -0.35                      | -1.07                      | 0.81                       |
| Cu | -0.92                    | 1.16                      | 0.24                    | -3.51                    | -0.26                      | -1.22                      | 0.47                       |
| Zn | -0.71                    | 1.10                      | -1.81                   | -1.69                    | -0.20                      | -1.13                      | 0.41                       |
| Y  | -1.06                    | 0.87                      | -2.29                   | -1.57                    | 0.09                       | -0.96                      | 0.88                       |
| Zr | -1.72                    | 0.14                      | -1.83                   | 0.01                     | -1.35                      | -0.35                      | 1.05                       |
| Nb | -2.54                    | 0.27                      | -0.62                   | -1.30                    | -0.62                      | -0.38                      | 1.16                       |
| Mo | -3.00                    | 0.41                      | -1.04                   | -0.70                    | -0.29                      | -0.56                      | 1.14                       |
| Tc | -3.16                    | 0.88                      | -1.28                   | -0.34                    | -0.52                      | -0.81                      | 1.20                       |
| Ru | -2.77                    | 1.35                      | -1.39                   | -0.18                    | -0.91                      | -0.94                      | 0.81                       |
| Rh | -2.00                    | 0.71                      | -0.09                   | -1.66                    | -0.35                      | -1.34                      | 0.69                       |
| Pd | -0.92                    | 1.25                      | 0.13                    | -3.06                    | -0.15                      | -1.50                      | 0.21                       |
| Ag | -0.46                    | 1.27                      | 0.88                    | -4.69                    | 0.48                       | -1.61                      | 0.09                       |
| Cd | -0.43                    | 1.13                      | 1.05                    | -4.57                    | 0.04                       | -1.52                      | 0.25                       |

|    |       |      |       |       |       |       |       |
|----|-------|------|-------|-------|-------|-------|-------|
| Hf | -1.83 | 0.21 | -1.52 | -0.35 | -1.39 | -0.38 | 1.22  |
| Ta | -2.66 | 0.04 | -0.90 | -1.10 | -0.64 | -0.08 | 1.30  |
| W  | -3.35 | 0.27 | -0.79 | -1.07 | -0.14 | -0.21 | 1.26  |
| Re | -3.45 | 0.61 | -1.28 | -0.58 | -0.06 | -0.40 | 1.12  |
| Os | -3.27 | 1.26 | -1.56 | -0.30 | -0.87 | -0.31 | 1.01  |
| Ir | -2.43 | 0.94 | -1.17 | -0.55 | -0.62 | -0.91 | 0.70  |
| Pt | -1.30 | 0.49 | -1.09 | -0.80 | -0.39 | -1.33 | 0.38  |
| Au | -0.71 | 1.28 | -2.13 | -1.35 | 0.34  | -1.54 | 0.08  |
| Hg | -0.34 | 1.19 | -2.49 | -1.30 | 0.25  | -1.23 | -0.11 |

---

**Table S7.** Gibbs free energy changes of NORR on TM/Cu(320).

|    | $\Delta G^*_{\text{NO}}$ | $\Delta G^*_{\text{NOH}}$ | $\Delta G^*_{\text{N}}$ | $\Delta G^*_{\text{NH}}$ | $\Delta G^*_{\text{NH}_2}$ | $\Delta G^*_{\text{NH}_3}$ | NH <sub>3</sub> desorption |
|----|--------------------------|---------------------------|-------------------------|--------------------------|----------------------------|----------------------------|----------------------------|
| Sc | -1.37                    | -0.41                     | -1.48                   | -0.63                    | -0.57                      | -0.61                      | 1.04                       |
| Ti | -2.83                    | 0.64                      | -1.80                   | -0.14                    | -0.90                      | -0.20                      | 1.20                       |
| V  | -2.94                    | 0.21                      | -0.86                   | -1.16                    | -0.39                      | -0.11                      | 1.20                       |
| Cr | -3.15                    | 0.52                      | -1.26                   | -0.64                    | -0.41                      | -0.28                      | 1.17                       |
| Mn | -1.40                    | 0.88                      | -1.23                   | -0.44                    | -0.46                      | -2.22                      | 0.83                       |
| Fe | -3.44                    | 1.20                      | -1.10                   | -0.39                    | -0.89                      | -0.50                      | 1.10                       |
| Co | -3.05                    | 1.47                      | -0.76                   | -0.69                    | -1.45                      | -0.48                      | 0.92                       |
| Ni | -2.39                    | 1.50                      | -0.26                   | -1.05                    | -1.60                      | -1.14                      | 0.91                       |
| Cu | -1.07                    | 1.19                      | -2.49                   | -0.81                    | 0.08                       | -1.57                      | 0.64                       |
| Zn | -0.64                    | 1.16                      | -2.77                   | 1.32                     | -2.20                      | -1.48                      | 0.57                       |
| Y  | -1.07                    | 0.80                      | -2.74                   | 1.21                     | -2.35                      | -0.78                      | 0.89                       |
| Zr | -2.70                    | 0.93                      | -2.01                   | 0.02                     | -1.43                      | -0.15                      | 1.32                       |
| Nb | -2.79                    | 0.21                      | -1.36                   | -0.61                    | -0.61                      | -0.20                      | 1.33                       |
| Mo | -3.28                    | 0.46                      | -1.18                   | -0.71                    | -0.36                      | -0.27                      | 1.30                       |
| Tc | -3.33                    | 0.75                      | -1.37                   | -0.28                    | -0.53                      | -0.49                      | 1.22                       |
| Ru | -3.13                    | 1.37                      | -1.46                   | -0.10                    | -0.89                      | -0.76                      | 0.93                       |
| Rh | -2.27                    | 1.32                      | -0.79                   | -0.55                    | -1.32                      | -1.06                      | 0.64                       |
| Pd | -1.11                    | 1.34                      | 0.03                    | -1.22                    | -1.68                      | -1.60                      | 0.21                       |
| Ag | -0.55                    | 1.39                      | 0.82                    | -1.96                    | -2.11                      | -1.68                      | 0.06                       |
| Cd | -0.42                    | 1.26                      | -2.98                   | 1.81                     | -2.45                      | -1.41                      | 0.15                       |

|    |       |      |       |       |       |       |       |
|----|-------|------|-------|-------|-------|-------|-------|
| Hf | -2.48 | 0.87 | -1.94 | -0.14 | -1.47 | -0.23 | 1.35  |
| Ta | -2.97 | 0.04 | -0.43 | -1.69 | -0.60 | 0.18  | 1.43  |
| W  | -3.54 | 0.22 | -0.98 | -1.21 | -0.02 | 0.10  | 1.40  |
| Re | -3.73 | 0.45 | -1.25 | -0.56 | -0.20 | -0.01 | 1.26  |
| Os | -3.59 | 1.17 | -1.63 | -0.32 | -0.54 | -0.37 | 1.24  |
| Ir | -2.80 | 0.95 | -0.99 | -0.26 | -0.95 | -0.81 | 0.82  |
| Pt | -1.55 | 1.15 | -0.50 | -0.79 | -1.45 | -1.27 | 0.38  |
| Au | -0.67 | 1.29 | 0.35  | -1.61 | -2.00 | -1.44 | 0.05  |
| Hg | -0.26 | 1.19 | 0.75  | -1.90 | -2.26 | -1.42 | -0.14 |

---

**Table S8.** Gibbs free energy changes of NORR on TM/Cu(553).

|    | $\Delta G^*_{\text{NO}}$ | $\Delta G^*_{\text{NOH}}$ | $\Delta G^*_{\text{N}}$ | $\Delta G^*_{\text{NH}}$ | $\Delta G^*_{\text{NH}_2}$ | $\Delta G^*_{\text{NH}_3}$ | NH <sub>3</sub> desorption |
|----|--------------------------|---------------------------|-------------------------|--------------------------|----------------------------|----------------------------|----------------------------|
| Sc | -2.09                    | 1.56                      | -2.27                   | -1.48                    | 0.14                       | -1.01                      | 1.12                       |
| Ti | -2.72                    | 0.71                      | -1.67                   | -0.21                    | -0.84                      | -0.58                      | 1.28                       |
| V  | -2.78                    | 0.04                      | -0.60                   | -1.11                    | -0.42                      | -0.45                      | 1.29                       |
| Cr | -3.38                    | 0.54                      | -0.95                   | -0.73                    | -0.48                      | -0.38                      | 1.35                       |
| Mn | -3.52                    | 0.85                      | -1.19                   | -0.47                    | -0.63                      | -0.27                      | 1.20                       |
| Fe | -3.34                    | 1.11                      | -0.94                   | -0.53                    | -0.69                      | -0.76                      | 1.13                       |
| Co | -2.93                    | 1.23                      | -0.57                   | -1.59                    | -0.25                      | -0.93                      | 1.00                       |
| Ni | -2.20                    | 1.02                      | 0.10                    | -2.39                    | -0.23                      | -1.08                      | 0.75                       |
| Cu | -1.02                    | 0.14                      | -0.83                   | -1.32                    | 0.07                       | -1.53                      | 0.46                       |
| Zn | -0.70                    | -0.09                     | -0.85                   | -1.41                    | 0.05                       | -1.39                      | 0.35                       |
| Y  | -0.92                    | 0.83                      | -2.43                   | -1.52                    | 0.27                       | -1.19                      | 0.91                       |
| Zr | -2.42                    | 0.87                      | -1.82                   | -0.08                    | -1.25                      | -0.49                      | 1.16                       |
| Nb | -2.54                    | 0.24                      | -1.54                   | -0.55                    | -0.48                      | -0.44                      | 1.28                       |
| Mo | -3.10                    | 0.51                      | -0.96                   | -0.97                    | -0.31                      | -0.48                      | 1.27                       |
| Tc | -3.24                    | 0.79                      | -1.26                   | -0.45                    | -0.43                      | -0.86                      | 1.42                       |
| Ru | -2.86                    | 1.09                      | -1.24                   | -0.22                    | -0.76                      | -1.13                      | 1.10                       |
| Rh | -2.12                    | 1.16                      | -0.58                   | -1.45                    | -0.46                      | -1.35                      | 0.77                       |
| Pd | -1.17                    | 0.75                      | -1.56                   | -0.77                    | 0.01                       | -1.53                      | 0.23                       |
| Ag | -0.59                    | 0.42                      | 1.82                    | -4.32                    | -1.02                      | -0.49                      | 0.16                       |
| Cd | -0.43                    | 0.23                      | -1.24                   | -1.37                    | 0.20                       | -1.58                      | 0.15                       |

|    |       |       |       |       |       |       |       |
|----|-------|-------|-------|-------|-------|-------|-------|
| Hf | -1.78 | 0.39  | -1.78 | -0.22 | -1.48 | -0.45 | 1.27  |
| Ta | -2.62 | -0.01 | -0.23 | -1.80 | -0.76 | -0.04 | 1.42  |
| W  | -3.38 | 0.23  | -0.78 | -1.22 | -0.34 | -0.02 | 1.47  |
| Re | -3.61 | 0.58  | -1.20 | -0.67 | -0.27 | -0.15 | 1.28  |
| Os | -3.27 | 0.88  | -1.37 | -0.39 | -0.47 | -0.62 | 1.20  |
| Ir | -2.40 | 1.03  | -1.10 | -0.51 | -0.95 | -0.92 | 0.82  |
| Pt | -1.38 | 1.10  | -0.45 | -1.89 | -0.60 | -1.29 | 0.47  |
| Au | -0.65 | 0.54  | 1.15  | -3.57 | -0.05 | -1.51 | 0.06  |
| Hg | -0.31 | 0.29  | 1.82  | -4.18 | -0.06 | -1.50 | -0.10 |

---



**Table S9.** The distance between the N atom of NH<sub>3</sub> from the nearest surface atom in the IS, TS and FS structures (Å).

| Systems    | IS    | TS    | FS    |
|------------|-------|-------|-------|
| Cd/Cu(553) | 2.424 | 4.409 | 6.294 |
| Zn/Cu(111) | 2.269 | 4.281 | 6.147 |
| Cu/Cu(111) | 2.172 | 4.770 | 7.336 |
| V/Cu(553)  | 2.185 | 4.124 | 6.723 |
| Cu/Cu(553) | 2.182 | 4.235 | 6.938 |
| Zn/Cu(553) | 2.266 | 4.480 | 6.989 |
| Nb/Cu(553) | 2.341 | 4.459 | 6.869 |
| Ta/Cu(553) | 2.308 | 4.456 | 6.857 |
| W/Cu(553)  | 2.275 | 4.438 | 6.894 |
| Sc/Cu(111) | 2.351 | 6.240 | 8.010 |
| Ta/Cu(111) | 2.297 | 5.331 | 8.199 |
| Ti/Cu(111) | 2.225 | 6.124 | 8.092 |
| Nb/Cu(100) | 2.329 | 4.798 | 7.395 |
| Ti/Cu(100) | 2.227 | 4.736 | 7.314 |
| Ta/Cu(100) | 2.294 | 4.898 | 7.434 |
| V/Cu(100)  | 2.149 | 4.769 | 7.374 |
| V/Cu(110)  | 2.164 | 6.154 | 9.011 |
| Zr/Cu(110) | 2.416 | 6.844 | 8.911 |
| Hf/Cu(110) | 2.349 | 6.626 | 9.009 |

|            |       |       |       |
|------------|-------|-------|-------|
| Ta/Cu(110) | 2.300 | 6.633 | 9.058 |
| W/Cu(110)  | 2.264 | 6.627 | 9.095 |
| Zr/Cu(211) | 2.429 | 5.390 | 6.897 |
| Ti/Cu(110) | 2.252 | 6.566 | 7.351 |
| V/Cu(211)  | 2.197 | 4.581 | 7.005 |
| W/Cu(211)  | 2.282 | 4.699 | 7.102 |
| Nb/Cu(211) | 2.351 | 4.666 | 7.012 |
| Hf/Cu(211) | 2.362 | 4.678 | 6.999 |
| Ta/Cu(211) | 2.314 | 4.662 | 7.059 |
| Sc/Cu(320) | 2.367 | 5.442 | 6.674 |
| V/Cu(320)  | 2.168 | 5.253 | 6.784 |
| Nb/Cu(320) | 2.330 | 5.386 | 6.790 |
| Ta/Cu(320) | 2.289 | 5.573 | 6.824 |
| W/Cu(320)  | 2.253 | 5.423 | 6.857 |

---

**Table S10.** Frequencies of IS, TS and FS for NH<sub>4</sub><sup>+</sup> formation on the 33 screened catalysts (cm<sup>-1</sup>).

|            | IS     | TS       | FS     |            | IS     | TS       | FS     |
|------------|--------|----------|--------|------------|--------|----------|--------|
| Sc/Cu(111) | 51.20  | -1100.99 | 46.00  | Ti/Cu(111) | 49.35  | -1089.42 | 44.02  |
|            | 53.50  | 51.09    | 51.24  |            | 58.41  | 47.50    | 49.27  |
|            | 65.69  | 53.37    | 52.17  |            | 60.51  | 49.27    | 57.84  |
|            | 67.30  | 66.14    | 56.41  |            | 61.12  | 58.93    | 60.11  |
|            | 67.61  | 66.98    | 66.79  |            | 66.90  | 60.16    | 60.34  |
|            | 68.09  | 67.20    | 67.42  |            | 67.19  | 60.51    | 64.33  |
|            | 68.95  | 67.92    | 67.97  |            | 68.72  | 66.94    | 67.20  |
|            | 70.52  | 68.01    | 68.09  |            | 69.33  | 67.23    | 68.09  |
|            | 71.90  | 69.82    | 70.07  |            | 73.26  | 68.31    | 68.69  |
|            | 72.88  | 71.14    | 71.17  |            | 73.71  | 68.87    | 69.04  |
|            | 74.73  | 72.27    | 71.50  |            | 74.50  | 73.51    | 74.16  |
|            | 75.13  | 72.91    | 73.84  |            | 74.73  | 73.95    | 74.85  |
|            | 76.46  | 74.91    | 74.55  |            | 75.55  | 74.60    | 75.16  |
|            | 76.94  | 74.97    | 75.36  |            | 75.93  | 75.05    | 75.86  |
|            | 88.59  | 76.63    | 75.80  |            | 83.12  | 75.59    | 76.38  |
|            | 88.75  | 77.92    | 77.10  |            | 84.80  | 76.00    | 77.56  |
|            | 89.12  | 88.19    | 78.29  |            | 85.70  | 84.57    | 84.45  |
|            | 89.89  | 88.95    | 89.37  |            | 88.77  | 84.95    | 85.38  |
|            | 90.92  | 89.61    | 90.02  |            | 89.42  | 88.21    | 88.02  |
|            | 92.46  | 90.94    | 90.40  |            | 90.48  | 90.20    | 89.79  |
|            | 93.94  | 92.11    | 91.05  |            | 92.10  | 92.38    | 92.40  |
|            | 97.55  | 93.49    | 91.78  |            | 93.05  | 92.78    | 92.74  |
|            | 97.60  | 94.86    | 93.42  |            | 93.30  | 93.24    | 93.29  |
|            | 98.30  | 96.73    | 96.33  |            | 96.02  | 95.57    | 95.55  |
|            | 99.34  | 97.04    | 96.78  |            | 97.52  | 96.78    | 96.50  |
|            | 102.41 | 97.84    | 97.56  |            | 98.48  | 98.11    | 98.11  |
|            | 103.08 | 98.90    | 98.86  |            | 99.08  | 100.23   | 100.46 |
|            | 103.35 | 102.05   | 100.94 |            | 100.86 | 100.78   | 100.98 |
|            | 104.38 | 102.84   | 102.16 |            | 101.12 | 101.25   | 101.93 |
|            | 104.57 | 102.98   | 103.44 |            | 103.14 | 103.28   | 103.45 |
|            | 105.09 | 104.36   | 104.10 |            | 103.71 | 103.66   | 104.04 |
|            | 105.93 | 104.57   | 104.76 |            | 104.19 | 104.08   | 104.37 |
|            | 106.42 | 105.75   | 105.14 |            | 104.67 | 104.95   | 105.30 |
|            | 107.18 | 105.99   | 105.94 |            | 105.56 | 105.27   | 105.88 |
|            | 107.83 | 106.67   | 106.38 |            | 105.72 | 105.44   | 106.00 |
|            | 108.45 | 107.05   | 107.10 |            | 106.17 | 106.24   | 106.46 |
|            | 109.27 | 108.01   | 107.19 |            | 106.30 | 106.40   | 106.71 |
|            | 111.37 | 108.18   | 108.22 |            | 106.74 | 106.67   | 106.90 |
|            | 112.56 | 109.71   | 108.38 |            | 106.85 | 107.07   | 107.23 |
|            | 113.84 | 110.63   | 109.81 |            | 109.47 | 109.00   | 108.60 |
|            | 116.09 | 111.94   | 111.06 |            | 110.04 | 109.97   | 110.47 |

---

|        |        |        |        |        |        |
|--------|--------|--------|--------|--------|--------|
| 116.41 | 114.49 | 112.95 | 110.98 | 110.88 | 111.57 |
| 117.51 | 115.88 | 114.89 | 112.44 | 112.14 | 112.91 |
| 119.14 | 115.92 | 115.99 | 116.26 | 115.71 | 115.29 |
| 120.89 | 117.04 | 116.24 | 117.00 | 116.88 | 116.06 |
| 121.56 | 119.61 | 116.63 | 117.04 | 117.05 | 116.63 |
| 122.43 | 120.67 | 120.43 | 118.59 | 117.99 | 117.28 |
| 123.32 | 121.96 | 121.85 | 120.32 | 119.48 | 119.13 |
| 123.88 | 122.47 | 121.98 | 120.56 | 120.59 | 119.48 |
| 124.37 | 123.37 | 122.19 | 120.81 | 121.43 | 121.10 |
| 124.80 | 123.48 | 123.16 | 121.86 | 122.12 | 122.23 |
| 124.96 | 124.13 | 123.35 | 123.00 | 122.83 | 122.90 |
| 125.23 | 124.55 | 123.67 | 123.17 | 123.26 | 123.44 |
| 125.62 | 124.65 | 124.27 | 123.88 | 123.94 | 123.86 |
| 125.94 | 125.00 | 124.59 | 124.02 | 124.18 | 123.93 |
| 126.17 | 125.31 | 125.14 | 124.44 | 124.76 | 124.64 |
| 126.24 | 125.93 | 125.41 | 125.56 | 125.50 | 124.97 |
| 128.38 | 126.06 | 125.64 | 126.84 | 125.91 | 125.94 |
| 128.53 | 126.09 | 125.92 | 127.17 | 126.72 | 126.15 |
| 129.36 | 128.22 | 126.00 | 127.71 | 127.61 | 127.14 |
| 129.53 | 128.36 | 127.76 | 128.14 | 127.82 | 127.49 |
| 129.84 | 129.04 | 128.14 | 128.39 | 128.26 | 128.16 |
| 130.65 | 129.46 | 128.70 | 128.79 | 128.51 | 128.37 |
| 131.10 | 129.78 | 129.02 | 129.47 | 128.98 | 128.86 |
| 131.60 | 130.15 | 129.75 | 129.66 | 129.20 | 129.02 |
| 133.49 | 130.67 | 129.80 | 129.91 | 129.47 | 129.19 |
| 133.99 | 131.08 | 130.16 | 130.35 | 130.20 | 129.26 |
| 134.41 | 133.15 | 130.87 | 131.06 | 130.67 | 130.17 |
| 134.62 | 133.50 | 132.65 | 131.77 | 131.47 | 130.42 |
| 134.83 | 134.08 | 133.04 | 132.79 | 132.52 | 131.36 |
| 135.53 | 134.28 | 133.73 | 134.88 | 134.55 | 132.69 |
| 136.05 | 134.43 | 133.96 | 135.17 | 135.06 | 134.61 |
| 136.96 | 135.84 | 134.18 | 135.83 | 136.20 | 134.98 |
| 138.06 | 136.62 | 135.84 | 137.61 | 137.39 | 136.63 |
| 138.73 | 136.85 | 136.86 | 137.73 | 137.60 | 137.66 |
| 139.15 | 138.72 | 138.57 | 138.34 | 137.98 | 137.91 |
| 139.87 | 139.34 | 138.65 | 138.88 | 138.47 | 138.37 |
| 141.39 | 139.78 | 139.35 | 139.74 | 139.16 | 138.61 |
| 142.10 | 141.34 | 139.82 | 140.39 | 139.96 | 139.36 |
| 142.50 | 141.90 | 141.33 | 140.58 | 140.24 | 140.05 |
| 142.91 | 142.40 | 141.76 | 141.15 | 141.05 | 140.24 |
| 145.62 | 142.51 | 142.20 | 141.47 | 141.32 | 141.09 |
| 145.68 | 145.23 | 142.40 | 142.63 | 142.33 | 141.45 |
| 146.61 | 145.46 | 144.68 | 143.83 | 143.28 | 142.35 |
| 146.84 | 146.39 | 145.02 | 144.02 | 143.73 | 143.04 |

---

---

|        |        |        |        |        |        |
|--------|--------|--------|--------|--------|--------|
| 148.77 | 146.56 | 146.14 | 144.40 | 144.11 | 143.39 |
| 149.65 | 148.63 | 146.43 | 145.52 | 144.77 | 144.03 |
| 149.74 | 149.03 | 148.29 | 146.18 | 145.72 | 144.59 |
| 150.02 | 149.25 | 148.62 | 147.05 | 146.63 | 145.50 |
| 150.12 | 149.45 | 148.84 | 147.58 | 147.05 | 146.50 |
| 150.41 | 149.50 | 149.24 | 147.82 | 147.28 | 146.82 |
| 150.64 | 150.23 | 149.35 | 149.56 | 149.11 | 147.24 |
| 151.18 | 150.60 | 149.65 | 150.62 | 149.67 | 148.96 |
| 152.32 | 151.06 | 150.51 | 151.19 | 149.97 | 149.48 |
| 152.67 | 151.89 | 150.61 | 151.56 | 150.26 | 149.84 |
| 153.61 | 152.07 | 151.49 | 152.38 | 151.53 | 150.35 |
| 153.78 | 153.01 | 151.60 | 152.75 | 152.13 | 151.62 |
| 154.67 | 153.36 | 152.44 | 155.03 | 154.42 | 152.05 |
| 155.11 | 154.08 | 152.80 | 155.23 | 154.83 | 154.24 |
| 156.12 | 154.74 | 153.53 | 156.38 | 155.88 | 154.76 |
| 156.59 | 154.90 | 154.07 | 156.61 | 156.47 | 155.53 |
| 158.03 | 154.96 | 154.27 | 157.24 | 156.80 | 156.29 |
| 160.65 | 158.43 | 155.53 | 157.43 | 157.19 | 156.72 |
| 160.82 | 159.81 | 158.47 | 158.26 | 157.30 | 157.01 |
| 162.54 | 159.95 | 159.74 | 158.74 | 157.76 | 157.08 |
| 162.66 | 160.43 | 159.85 | 158.90 | 158.34 | 157.73 |
| 162.84 | 161.61 | 161.04 | 161.33 | 160.33 | 158.22 |
| 163.99 | 163.67 | 161.55 | 162.18 | 161.15 | 160.54 |
| 164.67 | 163.80 | 163.13 | 163.52 | 162.77 | 161.42 |
| 166.16 | 166.03 | 163.33 | 164.29 | 163.70 | 162.51 |
| 166.73 | 166.49 | 165.70 | 164.71 | 164.15 | 163.52 |
| 167.82 | 167.69 | 166.02 | 167.36 | 166.60 | 163.97 |
| 169.77 | 169.91 | 167.37 | 167.86 | 166.87 | 166.44 |
| 170.66 | 170.35 | 169.28 | 170.15 | 169.78 | 166.74 |
| 171.15 | 170.63 | 169.93 | 171.18 | 170.35 | 169.90 |
| 171.78 | 171.12 | 170.72 | 172.45 | 171.89 | 170.39 |
| 172.23 | 171.42 | 170.97 | 173.21 | 172.39 | 171.75 |
| 173.37 | 172.45 | 171.21 | 173.47 | 173.05 | 172.59 |
| 173.85 | 173.60 | 172.62 | 173.56 | 173.26 | 172.96 |
| 174.72 | 174.18 | 173.30 | 174.05 | 173.87 | 173.21 |
| 175.65 | 175.05 | 173.88 | 174.79 | 174.21 | 173.81 |
| 176.18 | 175.20 | 174.44 | 175.71 | 175.34 | 174.00 |
| 176.43 | 176.00 | 175.17 | 176.09 | 175.41 | 175.12 |
| 177.06 | 176.67 | 175.39 | 177.00 | 176.52 | 175.50 |
| 177.42 | 177.33 | 176.54 | 177.27 | 176.99 | 176.30 |
| 179.12 | 178.20 | 177.80 | 177.65 | 177.76 | 176.91 |
| 181.13 | 178.95 | 178.27 | 178.36 | 177.91 | 177.72 |
| 181.24 | 181.07 | 180.44 | 181.68 | 180.50 | 178.10 |
| 182.92 | 181.98 | 180.68 | 182.41 | 180.98 | 180.45 |

---

---

|        |        |        |        |        |        |
|--------|--------|--------|--------|--------|--------|
| 183.20 | 182.32 | 181.72 | 182.96 | 181.89 | 181.38 |
| 184.00 | 183.55 | 182.16 | 184.28 | 184.02 | 181.73 |
| 184.73 | 184.06 | 183.24 | 184.77 | 184.42 | 183.86 |
| 185.41 | 184.96 | 183.47 | 186.32 | 185.81 | 184.23 |
| 187.51 | 186.30 | 184.56 | 186.93 | 186.55 | 185.72 |
| 187.99 | 187.19 | 185.89 | 188.36 | 186.96 | 186.53 |
| 190.98 | 189.70 | 186.82 | 189.55 | 188.65 | 187.80 |
| 191.08 | 190.27 | 189.29 | 189.74 | 188.95 | 188.30 |
| 191.85 | 190.76 | 190.37 | 189.96 | 189.56 | 188.59 |
| 192.43 | 191.48 | 190.70 | 190.38 | 189.67 | 189.36 |
| 192.71 | 191.70 | 191.22 | 192.75 | 192.43 | 189.43 |
| 192.96 | 192.00 | 191.42 | 192.95 | 192.60 | 192.13 |
| 194.47 | 193.00 | 192.40 | 193.76 | 193.35 | 192.45 |
| 195.23 | 194.48 | 193.76 | 194.04 | 193.48 | 193.15 |
| 196.90 | 194.76 | 194.09 | 196.54 | 194.62 | 193.27 |
| 204.95 | 195.39 | 194.57 | 202.55 | 195.53 | 193.86 |
| 205.89 | 203.18 | 202.42 | 203.49 | 200.86 | 198.99 |
| 206.75 | 204.64 | 203.34 | 203.60 | 202.17 | 200.88 |
| 207.86 | 205.25 | 203.55 | 204.35 | 203.16 | 201.37 |
| 210.77 | 207.62 | 205.36 | 210.12 | 208.80 | 203.01 |
| 212.86 | 210.29 | 209.51 | 210.81 | 210.41 | 209.12 |
| 215.13 | 212.52 | 212.14 | 212.97 | 210.80 | 210.09 |
| 215.63 | 215.09 | 214.34 | 215.09 | 212.98 | 212.08 |
| 216.57 | 215.40 | 214.81 | 216.33 | 214.73 | 214.54 |
| 216.84 | 216.00 | 215.08 | 216.67 | 216.16 | 215.74 |
| 217.52 | 216.44 | 215.68 | 216.94 | 216.30 | 215.84 |
| 217.66 | 217.32 | 216.39 | 217.27 | 216.71 | 216.16 |
| 218.18 | 217.43 | 216.59 | 218.22 | 216.93 | 216.36 |
| 218.59 | 217.93 | 217.26 | 218.91 | 217.79 | 217.29 |
| 219.23 | 218.22 | 217.38 | 219.16 | 218.49 | 218.06 |
| 220.68 | 219.30 | 218.56 | 220.60 | 218.83 | 218.44 |
| 221.56 | 220.77 | 219.75 | 221.31 | 220.45 | 220.22 |
| 221.86 | 221.65 | 220.57 | 221.34 | 221.11 | 220.59 |
| 222.37 | 221.73 | 220.76 | 221.99 | 221.32 | 220.84 |
| 222.98 | 222.81 | 221.45 | 222.13 | 221.68 | 221.34 |
| 229.34 | 223.22 | 222.17 | 225.85 | 221.86 | 221.46 |
| 230.50 | 227.29 | 226.90 | 226.64 | 223.94 | 222.71 |
| 232.92 | 228.92 | 228.21 | 233.65 | 225.02 | 223.23 |
| 233.17 | 232.96 | 232.36 | 234.38 | 233.58 | 233.27 |
| 236.01 | 233.19 | 232.68 | 234.73 | 233.98 | 233.33 |
| 236.23 | 235.76 | 235.09 | 235.61 | 234.15 | 233.79 |
| 238.14 | 236.27 | 235.56 | 235.99 | 234.71 | 234.18 |
| 238.50 | 237.02 | 236.40 | 236.46 | 235.13 | 234.35 |
| 240.10 | 238.17 | 237.29 | 239.67 | 235.56 | 234.95 |

---

|            |         |          |         |            |         |          |         |
|------------|---------|----------|---------|------------|---------|----------|---------|
|            | 241.62  | 239.92   | 239.46  |            | 240.44  | 238.96   | 238.42  |
|            | 242.05  | 241.61   | 240.83  |            | 242.48  | 239.32   | 238.75  |
|            | 244.00  | 241.81   | 240.95  |            | 243.38  | 241.78   | 241.52  |
|            | 244.44  | 242.51   | 241.53  |            | 243.62  | 242.77   | 242.39  |
|            | 247.07  | 243.07   | 242.06  |            | 244.34  | 243.08   | 242.64  |
|            | 248.36  | 246.47   | 245.63  |            | 244.94  | 243.59   | 243.18  |
|            | 249.32  | 247.64   | 246.55  |            | 248.06  | 243.98   | 243.48  |
|            | 250.29  | 249.03   | 247.04  |            | 248.99  | 247.61   | 247.38  |
|            | 251.77  | 249.29   | 248.19  |            | 249.15  | 248.42   | 248.08  |
|            | 253.08  | 249.97   | 248.82  |            | 250.27  | 248.90   | 248.30  |
|            | 254.00  | 251.06   | 249.59  |            | 251.42  | 249.41   | 248.94  |
|            | 254.80  | 252.22   | 251.25  |            | 253.04  | 250.97   | 250.81  |
|            | 257.21  | 253.77   | 252.73  |            | 253.73  | 252.69   | 252.20  |
|            | 259.83  | 256.90   | 255.56  |            | 254.11  | 253.42   | 252.89  |
|            | 261.15  | 259.11   | 257.38  |            | 256.04  | 253.76   | 253.34  |
|            | 261.70  | 259.64   | 258.07  |            | 257.33  | 255.94   | 255.44  |
|            | 262.10  | 259.98   | 258.47  |            | 257.88  | 256.77   | 256.37  |
|            | 270.45  | 262.02   | 260.20  |            | 266.72  | 257.35   | 257.01  |
|            | 523.92  | 270.51   | 268.91  |            | 492.05  | 266.34   | 265.95  |
|            | 528.00  | 311.30   | 333.25  |            | 515.10  | 316.52   | 376.62  |
|            | 759.31  | 422.02   | 483.07  |            | 895.44  | 445.17   | 489.96  |
|            | 3537.30 | 3550.21  | 3514.92 |            | 3548.08 | 3575.38  | 3528.72 |
| Cu/Cu(111) | 49.51   | -1231.46 | 48.97   | Zn/Cu(111) | 49.58   | -1169.50 | 48.59   |
|            | 53.69   | 48.33    | 53.44   |            | 53.58   | 53.81    | 49.23   |
|            | 67.80   | 49.23    | 64.60   |            | 68.22   | 69.73    | 54.50   |
|            | 69.45   | 49.38    | 69.75   |            | 69.88   | 70.11    | 65.73   |
|            | 70.07   | 53.76    | 70.12   |            | 70.50   | 70.44    | 70.07   |
|            | 70.40   | 69.48    | 70.71   |            | 70.61   | 70.85    | 70.49   |
|            | 71.86   | 70.03    | 71.35   |            | 71.59   | 71.10    | 70.95   |
|            | 72.04   | 70.78    | 72.43   |            | 72.48   | 72.63    | 72.05   |
|            | 76.14   | 71.03    | 74.15   |            | 75.60   | 75.25    | 73.05   |
|            | 76.91   | 71.98    | 77.40   |            | 76.38   | 76.83    | 73.82   |
|            | 76.95   | 72.55    | 77.66   |            | 76.87   | 77.62    | 76.97   |
|            | 77.28   | 76.57    | 78.03   |            | 77.57   | 77.99    | 77.73   |
|            | 78.38   | 77.38    | 78.57   |            | 78.58   | 78.25    | 78.08   |
|            | 78.74   | 77.61    | 78.84   |            | 78.61   | 79.00    | 78.77   |
|            | 90.68   | 77.72    | 83.83   |            | 90.29   | 91.71    | 78.83   |
|            | 91.26   | 78.88    | 89.24   |            | 91.56   | 92.49    | 81.99   |
|            | 93.60   | 79.11    | 91.91   |            | 94.23   | 93.43    | 91.31   |
|            | 94.56   | 91.98    | 94.05   |            | 94.73   | 93.85    | 93.31   |
|            | 95.92   | 93.59    | 95.11   |            | 95.61   | 95.75    | 94.41   |
|            | 96.41   | 94.02    | 96.48   |            | 96.14   | 96.52    | 96.11   |
|            | 96.72   | 96.15    | 96.75   |            | 96.62   | 97.00    | 96.36   |
|            | 98.14   | 96.47    | 97.40   |            | 97.28   | 98.14    | 97.02   |

---

|        |        |        |        |        |        |
|--------|--------|--------|--------|--------|--------|
| 100.92 | 96.69  | 98.20  | 98.04  | 99.93  | 97.63  |
| 101.35 | 96.85  | 98.70  | 100.97 | 101.34 | 97.70  |
| 101.74 | 98.21  | 101.51 | 102.19 | 102.14 | 100.68 |
| 102.22 | 100.90 | 101.94 | 102.53 | 102.49 | 102.29 |
| 102.71 | 101.27 | 103.36 | 102.82 | 103.39 | 102.63 |
| 103.54 | 102.07 | 104.02 | 103.78 | 103.81 | 103.32 |
| 105.02 | 102.86 | 104.84 | 104.49 | 105.77 | 104.36 |
| 106.50 | 103.65 | 106.46 | 106.37 | 106.20 | 104.78 |
| 106.72 | 104.53 | 107.42 | 106.79 | 107.29 | 106.57 |
| 107.53 | 106.02 | 107.78 | 107.17 | 107.98 | 107.47 |
| 107.87 | 106.68 | 108.74 | 108.01 | 108.56 | 107.93 |
| 108.98 | 107.28 | 109.26 | 108.80 | 109.14 | 108.74 |
| 109.24 | 108.37 | 110.01 | 108.96 | 109.86 | 109.12 |
| 110.41 | 108.52 | 110.37 | 110.56 | 110.85 | 109.63 |
| 110.98 | 109.28 | 111.31 | 111.15 | 111.12 | 110.62 |
| 112.67 | 109.45 | 112.07 | 112.84 | 113.24 | 110.97 |
| 114.00 | 111.05 | 112.72 | 113.56 | 114.08 | 111.71 |
| 114.85 | 111.15 | 113.52 | 114.14 | 114.35 | 113.10 |
| 115.07 | 113.21 | 114.89 | 114.76 | 115.23 | 113.62 |
| 119.36 | 113.94 | 116.40 | 118.96 | 119.07 | 115.38 |
| 120.93 | 115.28 | 116.84 | 119.37 | 120.74 | 115.80 |
| 121.72 | 115.85 | 121.19 | 121.33 | 121.57 | 120.02 |
| 122.61 | 120.70 | 122.72 | 122.35 | 122.42 | 120.73 |
| 123.84 | 122.66 | 123.65 | 122.52 | 123.04 | 122.41 |
| 124.10 | 123.07 | 124.00 | 123.47 | 124.17 | 123.12 |
| 124.68 | 123.57 | 125.61 | 124.15 | 124.71 | 123.38 |
| 125.05 | 125.12 | 125.91 | 124.93 | 125.44 | 124.30 |
| 126.09 | 125.52 | 126.14 | 125.88 | 125.72 | 125.51 |
| 126.18 | 125.65 | 126.22 | 126.03 | 126.24 | 125.88 |
| 126.47 | 126.23 | 126.62 | 126.41 | 126.60 | 126.23 |
| 126.79 | 126.29 | 126.75 | 126.59 | 126.73 | 126.49 |
| 127.09 | 126.37 | 127.24 | 127.04 | 127.25 | 126.57 |
| 127.87 | 126.75 | 127.51 | 127.55 | 127.72 | 126.74 |
| 127.95 | 126.99 | 127.82 | 128.19 | 128.31 | 127.34 |
| 128.75 | 127.31 | 128.04 | 128.46 | 128.40 | 127.73 |
| 129.01 | 127.39 | 128.40 | 129.11 | 128.58 | 127.97 |
| 129.24 | 128.09 | 128.64 | 129.45 | 129.34 | 128.53 |
| 129.66 | 128.45 | 128.74 | 129.76 | 130.35 | 128.82 |
| 129.97 | 128.96 | 129.31 | 129.85 | 130.42 | 129.12 |
| 132.04 | 129.19 | 129.70 | 131.74 | 131.54 | 129.44 |
| 132.50 | 129.46 | 130.20 | 132.38 | 131.94 | 130.13 |
| 132.84 | 129.72 | 131.84 | 133.10 | 132.47 | 131.21 |
| 132.99 | 131.87 | 132.30 | 133.31 | 132.98 | 131.75 |
| 133.44 | 132.07 | 132.44 | 133.59 | 133.55 | 132.17 |

---



---

|        |        |        |        |        |        |
|--------|--------|--------|--------|--------|--------|
| 135.39 | 132.29 | 132.87 | 134.83 | 133.95 | 133.21 |
| 135.52 | 132.87 | 133.15 | 135.32 | 135.47 | 133.37 |
| 135.79 | 132.94 | 135.92 | 136.15 | 136.63 | 134.98 |
| 136.43 | 134.56 | 136.06 | 136.53 | 136.78 | 135.75 |
| 136.80 | 135.68 | 136.47 | 137.30 | 137.08 | 136.05 |
| 137.44 | 135.94 | 136.59 | 137.55 | 137.41 | 136.93 |
| 140.02 | 136.26 | 138.39 | 139.55 | 139.21 | 137.08 |
| 142.28 | 136.83 | 138.84 | 142.16 | 141.06 | 138.28 |
| 143.01 | 137.70 | 141.97 | 142.84 | 143.52 | 140.86 |
| 144.37 | 140.19 | 143.74 | 143.40 | 144.05 | 142.56 |
| 144.55 | 143.72 | 143.99 | 144.56 | 144.24 | 143.55 |
| 144.81 | 144.19 | 144.45 | 144.83 | 144.62 | 144.07 |
| 145.29 | 144.35 | 144.96 | 145.44 | 145.25 | 144.53 |
| 145.66 | 144.76 | 145.28 | 145.81 | 145.71 | 145.15 |
| 146.21 | 144.96 | 145.45 | 146.92 | 146.27 | 145.42 |
| 146.70 | 145.29 | 145.63 | 147.03 | 147.10 | 145.93 |
| 147.19 | 145.47 | 146.34 | 147.80 | 147.44 | 146.01 |
| 148.20 | 145.82 | 146.52 | 148.48 | 148.13 | 146.52 |
| 148.96 | 146.36 | 147.35 | 148.89 | 148.98 | 147.59 |
| 149.81 | 146.62 | 147.74 | 149.83 | 149.52 | 147.85 |
| 150.08 | 147.48 | 148.57 | 150.39 | 150.44 | 148.24 |
| 150.86 | 147.90 | 150.26 | 151.15 | 150.69 | 149.20 |
| 152.03 | 150.40 | 150.50 | 151.97 | 151.57 | 149.46 |
| 152.43 | 150.60 | 150.71 | 152.71 | 152.31 | 150.04 |
| 152.94 | 151.14 | 151.29 | 153.03 | 152.65 | 151.08 |
| 153.13 | 151.22 | 151.61 | 153.23 | 152.98 | 151.80 |
| 153.51 | 151.44 | 151.69 | 153.67 | 153.37 | 152.03 |
| 153.78 | 152.07 | 152.18 | 154.45 | 153.82 | 152.11 |
| 154.62 | 152.63 | 152.76 | 154.49 | 154.18 | 152.55 |
| 156.06 | 153.09 | 152.89 | 156.28 | 154.87 | 153.05 |
| 156.24 | 153.35 | 154.94 | 156.65 | 155.78 | 153.67 |
| 156.52 | 154.85 | 155.33 | 157.14 | 156.38 | 154.45 |
| 156.76 | 155.08 | 155.87 | 157.19 | 157.16 | 154.99 |
| 157.01 | 155.73 | 156.21 | 157.29 | 157.17 | 156.07 |
| 157.33 | 156.01 | 156.39 | 157.57 | 157.21 | 156.60 |
| 157.49 | 156.38 | 156.49 | 158.32 | 157.77 | 156.76 |
| 160.72 | 156.56 | 156.82 | 160.77 | 159.19 | 156.90 |
| 161.09 | 156.86 | 157.06 | 161.11 | 161.59 | 157.26 |
| 163.49 | 157.15 | 161.34 | 164.04 | 161.89 | 157.84 |
| 163.56 | 161.17 | 161.70 | 164.44 | 164.25 | 160.91 |
| 164.55 | 161.58 | 163.16 | 164.92 | 164.69 | 161.30 |
| 165.56 | 163.03 | 163.49 | 165.85 | 165.34 | 163.60 |
| 170.37 | 163.34 | 164.04 | 169.77 | 165.97 | 163.92 |
| 170.90 | 164.30 | 165.18 | 170.65 | 170.03 | 164.70 |

---

---

|        |        |        |        |        |        |
|--------|--------|--------|--------|--------|--------|
| 172.43 | 165.11 | 169.87 | 171.43 | 170.27 | 165.49 |
| 173.33 | 170.08 | 170.63 | 172.28 | 171.59 | 169.38 |
| 173.50 | 170.42 | 171.63 | 172.96 | 171.85 | 169.70 |
| 173.83 | 171.36 | 172.07 | 173.55 | 172.98 | 171.23 |
| 173.98 | 172.94 | 172.88 | 174.11 | 173.56 | 171.32 |
| 174.71 | 173.26 | 173.43 | 174.15 | 173.95 | 172.47 |
| 174.87 | 173.94 | 174.03 | 174.83 | 174.12 | 173.00 |
| 175.32 | 174.03 | 174.57 | 175.04 | 175.04 | 173.09 |
| 175.67 | 174.52 | 174.63 | 175.33 | 175.11 | 173.70 |
| 175.76 | 174.76 | 174.95 | 175.61 | 175.66 | 174.52 |
| 175.95 | 174.90 | 175.09 | 175.97 | 175.98 | 175.00 |
| 176.08 | 175.26 | 175.19 | 176.46 | 176.34 | 175.31 |
| 176.51 | 175.29 | 175.45 | 176.67 | 176.63 | 175.39 |
| 176.70 | 175.51 | 175.70 | 177.14 | 177.13 | 175.67 |
| 176.95 | 175.64 | 175.94 | 178.23 | 177.25 | 175.89 |
| 177.94 | 176.14 | 176.52 | 178.66 | 178.12 | 175.98 |
| 178.17 | 176.31 | 176.63 | 179.01 | 178.38 | 176.18 |
| 182.57 | 176.91 | 177.35 | 182.63 | 178.85 | 177.12 |
| 183.40 | 177.50 | 177.52 | 183.28 | 182.41 | 177.92 |
| 183.92 | 177.68 | 181.99 | 183.93 | 183.15 | 178.39 |
| 184.95 | 182.77 | 182.75 | 184.21 | 183.52 | 180.58 |
| 185.20 | 182.99 | 183.56 | 184.97 | 184.95 | 182.70 |
| 186.37 | 184.31 | 184.37 | 186.04 | 185.67 | 183.01 |
| 191.69 | 184.48 | 185.06 | 191.65 | 186.28 | 184.24 |
| 191.80 | 185.47 | 185.93 | 192.26 | 191.93 | 184.63 |
| 193.25 | 186.24 | 191.63 | 193.42 | 192.82 | 185.79 |
| 193.74 | 191.86 | 192.07 | 193.67 | 193.41 | 191.75 |
| 194.66 | 191.99 | 193.43 | 194.98 | 193.94 | 192.58 |
| 195.11 | 193.65 | 193.71 | 195.66 | 194.75 | 193.21 |
| 195.61 | 193.79 | 194.02 | 195.88 | 195.58 | 193.52 |
| 196.11 | 194.17 | 194.19 | 196.59 | 195.61 | 194.16 |
| 196.41 | 194.32 | 194.85 | 196.66 | 196.33 | 194.68 |
| 197.16 | 195.13 | 195.57 | 197.05 | 196.79 | 195.32 |
| 197.54 | 195.61 | 196.40 | 197.76 | 197.21 | 195.59 |
| 198.59 | 196.37 | 196.63 | 199.08 | 197.64 | 196.29 |
| 204.89 | 196.70 | 196.76 | 203.87 | 199.06 | 196.85 |
| 209.28 | 196.85 | 196.85 | 209.63 | 203.59 | 196.97 |
| 214.13 | 197.09 | 202.83 | 212.73 | 209.67 | 197.99 |
| 215.24 | 204.39 | 208.94 | 214.56 | 213.17 | 201.34 |
| 216.92 | 209.15 | 214.21 | 215.87 | 215.14 | 209.20 |
| 217.34 | 214.65 | 215.75 | 216.85 | 216.12 | 212.17 |
| 217.65 | 216.17 | 216.99 | 217.47 | 216.99 | 214.89 |
| 217.93 | 217.21 | 217.13 | 217.71 | 217.70 | 215.59 |
| 218.27 | 217.34 | 217.64 | 218.33 | 218.05 | 217.19 |

---

---

|            |         |          |       |            |         |          |       |
|------------|---------|----------|-------|------------|---------|----------|-------|
| 218.52     | 218.02  | 217.92   |       | 218.59     | 218.44  | 217.24   |       |
| 219.05     | 218.19  | 218.08   |       | 218.98     | 218.61  | 218.07   |       |
| 219.20     | 218.34  | 218.30   |       | 219.13     | 219.04  | 218.18   |       |
| 219.60     | 218.77  | 218.90   |       | 219.49     | 219.12  | 218.51   |       |
| 220.27     | 218.81  | 219.02   |       | 219.86     | 219.48  | 218.55   |       |
| 220.61     | 219.21  | 219.06   |       | 220.73     | 219.75  | 218.68   |       |
| 220.78     | 219.66  | 219.24   |       | 220.84     | 220.19  | 219.16   |       |
| 220.92     | 219.80  | 219.60   |       | 221.41     | 220.75  | 219.29   |       |
| 221.59     | 219.97  | 219.89   |       | 222.52     | 221.46  | 219.70   |       |
| 222.22     | 220.22  | 220.15   |       | 223.31     | 222.43  | 220.14   |       |
| 234.38     | 220.65  | 220.77   |       | 233.10     | 223.77  | 220.42   |       |
| 234.85     | 220.80  | 221.13   |       | 233.83     | 233.55  | 221.59   |       |
| 235.07     | 221.74  | 223.33   |       | 235.08     | 234.13  | 222.27   |       |
| 235.41     | 234.48  | 234.36   |       | 235.48     | 235.16  | 233.54   |       |
| 236.90     | 234.83  | 234.50   |       | 236.92     | 235.58  | 233.96   |       |
| 237.07     | 235.08  | 234.74   |       | 238.01     | 236.65  | 234.81   |       |
| 242.29     | 235.30  | 234.88   |       | 240.66     | 238.53  | 235.03   |       |
| 243.15     | 236.81  | 236.44   |       | 241.69     | 241.11  | 236.36   |       |
| 243.73     | 236.85  | 236.77   |       | 243.03     | 241.93  | 237.67   |       |
| 243.97     | 242.51  | 241.98   |       | 244.17     | 243.30  | 241.30   |       |
| 245.07     | 242.76  | 242.29   |       | 244.59     | 244.18  | 241.97   |       |
| 245.27     | 243.57  | 243.09   |       | 245.98     | 244.52  | 242.70   |       |
| 246.29     | 243.77  | 243.27   |       | 246.71     | 245.81  | 243.47   |       |
| 246.73     | 244.56  | 244.02   |       | 247.00     | 246.77  | 243.96   |       |
| 247.35     | 244.71  | 244.23   |       | 247.70     | 246.89  | 245.30   |       |
| 247.64     | 245.99  | 245.94   |       | 248.15     | 247.81  | 245.58   |       |
| 254.78     | 246.44  | 246.14   |       | 253.00     | 248.50  | 246.53   |       |
| 255.66     | 247.00  | 246.82   |       | 254.67     | 252.99  | 247.06   |       |
| 256.25     | 247.45  | 247.18   |       | 256.35     | 254.99  | 247.48   |       |
| 256.84     | 254.81  | 254.06   |       | 256.83     | 255.41  | 249.05   |       |
| 257.63     | 255.62  | 254.86   |       | 258.31     | 257.36  | 253.90   |       |
| 257.75     | 255.74  | 255.29   |       | 258.65     | 257.85  | 255.66   |       |
| 258.52     | 256.74  | 255.97   |       | 259.56     | 258.54  | 256.52   |       |
| 258.83     | 256.82  | 256.35   |       | 259.81     | 259.48  | 256.99   |       |
| 270.69     | 257.12  | 256.82   |       | 271.01     | 260.30  | 257.44   |       |
| 377.30     | 257.87  | 257.22   |       | 377.48     | 270.90  | 257.92   |       |
| 388.41     | 258.51  | 257.63   |       | 380.02     | 306.84  | 258.28   |       |
| 485.93     | 270.16  | 268.94   |       | 502.72     | 443.29  | 259.37   |       |
| 504.41     | 308.10  | 286.26   |       | 508.61     | 541.99  | 270.50   |       |
| 516.00     | 547.81  | 481.94   |       | 579.74     | 579.34  | 425.49   |       |
| 3532.78    | 3601.96 | 3529.72  |       | 3536.53    | 3519.95 | 3533.35  |       |
| Ta/Cu(111) | 51.38   | -1211.38 | 46.50 | Ti/Cu(100) | 52.86   | -1781.35 | 54.87 |
|            | 52.20   | 61.44    | 52.66 |            | 56.25   | 53.64    | 55.48 |
|            | 62.23   | 66.82    | 61.43 |            | 56.26   | 56.42    | 57.33 |

---

---

|        |        |        |        |        |        |
|--------|--------|--------|--------|--------|--------|
| 67.23  | 67.16  | 67.57  | 57.67  | 56.51  | 57.91  |
| 67.48  | 68.83  | 68.86  | 60.97  | 60.23  | 61.03  |
| 68.89  | 72.14  | 70.18  | 61.12  | 60.53  | 61.26  |
| 74.99  | 74.52  | 74.60  | 61.71  | 61.02  | 61.39  |
| 75.56  | 74.88  | 75.73  | 61.72  | 61.40  | 62.01  |
| 76.42  | 76.50  | 76.67  | 63.81  | 62.17  | 63.51  |
| 76.88  | 78.45  | 77.13  | 63.83  | 63.78  | 63.99  |
| 79.55  | 78.90  | 79.82  | 64.46  | 64.11  | 64.38  |
| 79.90  | 79.47  | 79.96  | 65.68  | 65.64  | 65.39  |
| 80.88  | 80.92  | 80.34  | 77.36  | 68.15  | 80.15  |
| 81.24  | 81.24  | 81.40  | 79.05  | 78.08  | 80.36  |
| 82.32  | 84.30  | 82.20  | 79.05  | 78.61  | 80.40  |
| 90.71  | 89.69  | 90.05  | 79.93  | 79.24  | 80.99  |
| 92.84  | 92.91  | 91.47  | 80.22  | 79.82  | 82.41  |
| 93.97  | 94.09  | 94.10  | 81.07  | 80.97  | 82.54  |
| 95.21  | 94.21  | 94.56  | 83.33  | 81.79  | 82.61  |
| 97.61  | 97.00  | 97.15  | 83.34  | 82.20  | 83.04  |
| 98.22  | 98.17  | 97.84  | 83.62  | 82.57  | 83.59  |
| 102.48 | 102.58 | 99.91  | 83.64  | 83.65  | 83.88  |
| 105.35 | 104.95 | 103.16 | 87.33  | 84.87  | 87.16  |
| 106.32 | 106.36 | 105.03 | 87.36  | 87.42  | 87.45  |
| 107.49 | 107.05 | 105.70 | 88.22  | 87.99  | 87.63  |
| 108.12 | 107.85 | 106.76 | 88.24  | 88.35  | 88.06  |
| 108.86 | 108.65 | 108.31 | 93.00  | 88.86  | 91.70  |
| 109.53 | 109.37 | 109.11 | 93.02  | 92.23  | 91.88  |
| 110.05 | 109.44 | 109.42 | 95.04  | 92.79  | 94.39  |
| 110.10 | 110.03 | 109.93 | 96.61  | 94.14  | 96.38  |
| 110.80 | 110.57 | 111.42 | 97.09  | 96.34  | 96.50  |
| 111.92 | 111.91 | 111.87 | 97.10  | 96.73  | 96.54  |
| 112.82 | 112.41 | 112.63 | 98.47  | 97.05  | 98.06  |
| 113.32 | 112.84 | 113.29 | 98.76  | 98.18  | 98.61  |
| 113.67 | 113.17 | 113.73 | 104.86 | 98.71  | 104.96 |
| 114.29 | 113.75 | 113.91 | 106.89 | 104.60 | 106.75 |
| 114.86 | 114.51 | 114.42 | 107.10 | 106.24 | 107.85 |
| 115.21 | 115.22 | 114.92 | 107.10 | 106.86 | 107.92 |
| 116.36 | 115.91 | 115.13 | 107.34 | 107.21 | 108.75 |
| 118.81 | 118.77 | 115.97 | 108.26 | 108.14 | 109.47 |
| 120.09 | 119.99 | 118.56 | 108.26 | 108.50 | 109.61 |
| 121.22 | 120.33 | 119.73 | 108.57 | 108.58 | 110.70 |
| 121.37 | 121.54 | 120.93 | 108.70 | 108.62 | 113.35 |
| 124.53 | 124.06 | 121.27 | 114.06 | 113.07 | 114.20 |
| 126.17 | 125.24 | 124.11 | 114.75 | 113.49 | 114.26 |
| 127.54 | 126.88 | 124.58 | 114.76 | 114.28 | 114.89 |
| 128.15 | 127.56 | 127.32 | 114.84 | 114.77 | 115.18 |

---

---

|        |        |        |        |        |        |
|--------|--------|--------|--------|--------|--------|
| 128.97 | 128.21 | 128.05 | 115.42 | 114.93 | 116.97 |
| 129.06 | 128.62 | 128.51 | 116.86 | 116.24 | 117.15 |
| 129.98 | 129.00 | 128.85 | 117.14 | 116.45 | 117.19 |
| 130.73 | 130.13 | 129.32 | 117.15 | 116.60 | 117.71 |
| 130.83 | 130.33 | 130.02 | 117.73 | 117.14 | 117.80 |
| 130.96 | 130.74 | 130.49 | 118.07 | 117.23 | 118.20 |
| 131.23 | 131.17 | 130.97 | 118.84 | 117.71 | 119.33 |
| 131.37 | 131.33 | 131.14 | 118.84 | 119.18 | 119.46 |
| 131.69 | 131.52 | 131.47 | 134.06 | 119.23 | 133.94 |
| 131.91 | 131.75 | 131.72 | 134.85 | 134.05 | 134.35 |
| 134.57 | 134.74 | 132.02 | 134.86 | 134.43 | 134.40 |
| 135.29 | 135.36 | 133.56 | 134.90 | 134.60 | 134.53 |
| 135.72 | 135.86 | 134.47 | 136.53 | 134.69 | 135.43 |
| 136.32 | 136.39 | 135.24 | 136.97 | 135.84 | 135.48 |
| 136.74 | 136.86 | 135.63 | 137.29 | 136.52 | 136.67 |
| 137.83 | 137.93 | 136.64 | 137.30 | 136.65 | 136.90 |
| 138.38 | 138.52 | 136.80 | 137.53 | 136.89 | 137.19 |
| 139.41 | 138.94 | 137.72 | 138.36 | 137.19 | 137.59 |
| 141.45 | 140.53 | 138.15 | 138.40 | 137.54 | 137.86 |
| 141.70 | 141.34 | 138.56 | 138.40 | 138.20 | 138.42 |
| 142.25 | 142.15 | 141.28 | 138.59 | 138.33 | 138.48 |
| 142.57 | 142.30 | 141.82 | 139.34 | 138.57 | 139.02 |
| 142.66 | 142.62 | 141.97 | 140.69 | 138.76 | 140.21 |
| 143.20 | 142.75 | 142.36 | 140.70 | 140.52 | 140.26 |
| 143.79 | 143.65 | 142.47 | 141.16 | 140.85 | 140.36 |
| 143.93 | 143.96 | 143.38 | 141.73 | 140.88 | 141.33 |
| 144.96 | 144.44 | 143.93 | 141.87 | 141.54 | 141.63 |
| 145.14 | 145.52 | 144.35 | 141.98 | 141.60 | 141.64 |
| 145.91 | 146.05 | 145.02 | 141.98 | 141.77 | 141.92 |
| 146.25 | 146.58 | 145.28 | 142.13 | 141.87 | 142.00 |
| 146.92 | 147.06 | 145.89 | 142.60 | 142.28 | 142.11 |
| 147.83 | 148.81 | 146.49 | 142.94 | 142.53 | 142.30 |
| 150.00 | 150.21 | 147.11 | 143.15 | 142.67 | 142.83 |
| 151.09 | 151.12 | 148.44 | 143.15 | 142.73 | 142.87 |
| 151.79 | 151.75 | 150.32 | 143.43 | 142.97 | 142.95 |
| 152.33 | 152.60 | 151.13 | 144.01 | 143.02 | 143.45 |
| 153.22 | 153.47 | 151.70 | 144.71 | 143.47 | 144.77 |
| 154.05 | 154.41 | 152.25 | 144.71 | 144.62 | 144.77 |
| 155.26 | 155.31 | 153.21 | 145.38 | 144.83 | 145.03 |
| 155.71 | 155.55 | 153.59 | 145.39 | 145.00 | 145.03 |
| 156.71 | 156.63 | 155.05 | 145.58 | 145.04 | 145.28 |
| 156.81 | 157.14 | 155.98 | 145.78 | 145.44 | 145.85 |
| 157.81 | 157.79 | 156.55 | 146.81 | 145.81 | 146.61 |
| 158.44 | 158.70 | 157.01 | 147.81 | 146.65 | 146.85 |

---

---

|        |        |        |        |        |        |
|--------|--------|--------|--------|--------|--------|
| 158.55 | 159.04 | 157.66 | 147.82 | 146.88 | 146.86 |
| 160.39 | 160.20 | 158.25 | 148.52 | 147.06 | 148.83 |
| 161.07 | 161.04 | 158.76 | 150.60 | 148.65 | 149.40 |
| 161.45 | 162.14 | 160.02 | 151.24 | 149.91 | 149.63 |
| 162.30 | 162.40 | 160.79 | 151.25 | 150.27 | 151.69 |
| 163.21 | 163.41 | 161.16 | 152.08 | 150.71 | 152.32 |
| 164.12 | 164.29 | 161.71 | 153.62 | 152.62 | 152.50 |
| 164.37 | 165.00 | 163.45 | 153.63 | 153.12 | 153.06 |
| 165.32 | 165.49 | 164.11 | 156.14 | 153.38 | 153.24 |
| 166.15 | 166.80 | 164.24 | 156.22 | 153.61 | 153.75 |
| 167.10 | 166.85 | 164.89 | 161.25 | 154.64 | 160.73 |
| 167.46 | 167.90 | 166.24 | 164.13 | 157.42 | 161.98 |
| 167.63 | 168.24 | 166.57 | 165.53 | 162.91 | 164.20 |
| 168.79 | 169.26 | 167.30 | 165.55 | 164.50 | 164.48 |
| 169.33 | 169.87 | 167.48 | 170.45 | 164.99 | 170.10 |
| 170.56 | 170.39 | 168.63 | 170.90 | 166.56 | 170.38 |
| 172.07 | 172.04 | 169.07 | 171.53 | 170.65 | 170.68 |
| 173.44 | 173.47 | 170.15 | 171.53 | 171.12 | 170.89 |
| 173.66 | 174.82 | 171.78 | 171.92 | 172.15 | 172.12 |
| 175.69 | 176.56 | 173.14 | 171.93 | 172.50 | 172.34 |
| 178.36 | 178.25 | 173.39 | 173.33 | 172.70 | 172.36 |
| 178.58 | 178.88 | 175.23 | 174.28 | 172.93 | 172.48 |
| 180.00 | 180.65 | 178.04 | 175.52 | 173.42 | 173.50 |
| 181.45 | 181.53 | 178.75 | 175.57 | 176.05 | 176.65 |
| 181.86 | 181.96 | 179.87 | 179.41 | 176.54 | 177.68 |
| 183.10 | 184.02 | 181.13 | 179.50 | 179.04 | 178.64 |
| 183.86 | 184.59 | 181.94 | 179.51 | 179.50 | 179.18 |
| 184.65 | 184.77 | 182.34 | 179.59 | 179.63 | 179.24 |
| 184.75 | 185.14 | 183.39 | 186.19 | 179.73 | 180.39 |
| 185.67 | 186.35 | 184.35 | 187.52 | 185.50 | 184.97 |
| 185.88 | 186.66 | 184.56 | 188.25 | 188.13 | 187.62 |
| 187.39 | 187.58 | 185.09 | 189.91 | 188.39 | 187.94 |
| 187.95 | 187.95 | 185.98 | 190.07 | 188.95 | 188.00 |
| 188.23 | 188.46 | 187.09 | 190.08 | 189.69 | 188.57 |
| 188.76 | 188.82 | 187.62 | 192.09 | 189.75 | 188.93 |
| 189.37 | 189.28 | 187.98 | 194.15 | 191.12 | 190.26 |
| 189.68 | 189.85 | 188.64 | 194.53 | 192.54 | 192.19 |
| 190.40 | 190.37 | 188.87 | 195.76 | 194.07 | 193.19 |
| 191.04 | 190.88 | 189.51 | 195.82 | 194.86 | 193.69 |
| 192.59 | 192.55 | 189.94 | 196.20 | 195.08 | 193.94 |
| 194.07 | 194.28 | 190.63 | 196.77 | 195.51 | 195.03 |
| 196.63 | 196.20 | 192.31 | 197.61 | 196.78 | 196.21 |
| 196.99 | 196.76 | 193.63 | 197.62 | 196.82 | 196.27 |
| 197.73 | 197.66 | 196.41 | 198.02 | 197.40 | 196.44 |

---

---

|        |        |        |        |        |        |
|--------|--------|--------|--------|--------|--------|
| 197.99 | 198.67 | 196.59 | 198.11 | 197.50 | 197.00 |
| 198.82 | 199.14 | 197.60 | 208.49 | 197.60 | 197.06 |
| 199.80 | 199.60 | 198.08 | 208.83 | 208.78 | 208.36 |
| 199.97 | 200.02 | 198.62 | 209.40 | 208.89 | 208.77 |
| 200.32 | 200.98 | 199.66 | 209.41 | 209.24 | 208.90 |
| 202.72 | 202.88 | 199.81 | 213.73 | 209.42 | 208.97 |
| 202.91 | 204.62 | 199.87 | 215.49 | 213.33 | 212.72 |
| 205.34 | 205.89 | 202.71 | 215.93 | 215.39 | 214.72 |
| 206.38 | 206.62 | 202.77 | 215.93 | 215.52 | 215.09 |
| 207.08 | 207.20 | 205.71 | 218.07 | 216.06 | 215.11 |
| 208.00 | 209.03 | 206.19 | 218.08 | 217.12 | 216.43 |
| 214.25 | 215.09 | 206.62 | 221.45 | 217.19 | 216.45 |
| 214.88 | 215.76 | 207.68 | 222.08 | 221.44 | 221.34 |
| 215.79 | 216.90 | 213.97 | 222.08 | 221.98 | 221.92 |
| 217.54 | 221.79 | 214.65 | 222.63 | 222.04 | 221.92 |
| 221.87 | 222.17 | 216.04 | 222.99 | 222.62 | 222.03 |
| 222.43 | 222.27 | 221.51 | 223.21 | 222.97 | 222.13 |
| 222.55 | 223.35 | 221.98 | 224.55 | 223.30 | 222.52 |
| 223.95 | 225.75 | 222.14 | 224.56 | 223.40 | 223.44 |
| 226.17 | 226.50 | 223.42 | 225.49 | 224.28 | 223.57 |
| 226.44 | 226.70 | 224.28 | 225.50 | 225.69 | 225.54 |
| 226.87 | 226.99 | 225.81 | 233.14 | 226.28 | 226.41 |
| 227.16 | 227.21 | 226.37 | 233.31 | 227.46 | 226.70 |
| 227.80 | 228.68 | 226.73 | 235.31 | 229.95 | 226.85 |
| 228.31 | 229.73 | 226.96 | 239.43 | 234.57 | 234.80 |
| 229.53 | 230.11 | 227.76 | 239.59 | 239.24 | 238.95 |
| 229.73 | 230.99 | 229.16 | 239.59 | 239.38 | 239.01 |
| 230.73 | 231.37 | 229.31 | 240.17 | 239.55 | 239.04 |
| 231.35 | 232.72 | 230.09 | 240.69 | 240.14 | 239.73 |
| 232.54 | 233.21 | 230.45 | 240.71 | 240.20 | 240.35 |
| 232.85 | 242.30 | 231.98 | 240.72 | 240.42 | 240.38 |
| 242.39 | 243.09 | 232.08 | 242.03 | 240.74 | 240.84 |
| 243.27 | 244.42 | 242.22 | 242.03 | 241.89 | 241.56 |
| 244.39 | 245.89 | 242.77 | 242.06 | 242.10 | 241.57 |
| 245.51 | 245.94 | 244.11 | 242.56 | 242.37 | 242.35 |
| 245.66 | 246.30 | 244.82 | 248.74 | 242.80 | 242.51 |
| 245.96 | 250.82 | 244.93 | 248.99 | 248.52 | 248.30 |
| 250.95 | 251.47 | 245.30 | 249.00 | 248.94 | 249.00 |
| 251.03 | 251.89 | 250.44 | 250.35 | 249.05 | 249.01 |
| 252.06 | 252.76 | 250.59 | 250.55 | 250.12 | 249.82 |
| 252.87 | 253.50 | 251.75 | 250.56 | 250.23 | 250.01 |
| 253.45 | 255.34 | 252.49 | 250.57 | 250.40 | 250.03 |
| 255.35 | 255.60 | 252.76 | 251.61 | 250.54 | 250.04 |
| 255.40 | 256.30 | 254.81 | 252.71 | 251.59 | 251.31 |

---

|           |         |          |         |            |         |          |         |
|-----------|---------|----------|---------|------------|---------|----------|---------|
|           | 256.53  | 256.70   | 254.96  |            | 253.70  | 252.85   | 252.18  |
|           | 257.08  | 259.46   | 255.77  |            | 253.70  | 253.13   | 252.94  |
|           | 259.51  | 260.71   | 256.00  |            | 254.07  | 253.55   | 252.96  |
|           | 260.61  | 266.55   | 258.97  |            | 256.30  | 253.97   | 253.58  |
|           | 266.52  | 267.50   | 259.63  |            | 257.78  | 256.56   | 256.73  |
|           | 267.13  | 267.76   | 266.00  |            | 257.79  | 257.37   | 256.85  |
|           | 267.43  | 268.65   | 266.43  |            | 264.47  | 257.73   | 256.86  |
|           | 268.56  | 269.73   | 266.82  |            | 265.90  | 264.55   | 264.18  |
|           | 269.73  | 270.76   | 267.44  |            | 265.91  | 265.95   | 265.99  |
|           | 270.35  | 271.49   | 269.15  |            | 265.93  | 266.12   | 266.06  |
|           | 271.42  | 281.81   | 269.67  |            | 497.74  | 266.23   | 266.12  |
|           | 281.44  | 342.62   | 270.74  |            | 503.01  | 318.34   | 373.04  |
|           | 597.30  | 485.93   | 280.78  |            | 894.82  | 420.68   | 491.41  |
|           | 675.85  | 523.92   | 351.01  |            | 3540.98 | 3563.40  | 3514.97 |
|           | 866.89  | 762.66   | 533.48  | Nb/Cu(100) | 42.30   | -1675.50 | 41.90   |
|           | 3608.82 | 3533.35  | 3524.66 |            | 44.80   | 42.10    | 45.31   |
| V/Cu(100) | 47.20   | -1301.35 | 45.07   |            | 47.95   | 46.45    | 46.93   |
|           | 48.45   | 45.36    | 47.45   |            | 48.69   | 47.49    | 48.32   |
|           | 49.24   | 47.70    | 47.61   |            | 49.12   | 48.71    | 51.07   |
|           | 49.64   | 49.54    | 49.39   |            | 53.18   | 48.88    | 51.67   |
|           | 52.36   | 49.62    | 52.79   |            | 53.73   | 51.58    | 53.73   |
|           | 52.82   | 52.26    | 52.92   |            | 53.81   | 53.41    | 55.15   |
|           | 54.14   | 53.34    | 53.47   |            | 54.19   | 54.05    | 56.04   |
|           | 54.25   | 53.88    | 54.37   |            | 54.28   | 54.62    | 57.41   |
|           | 55.37   | 54.29    | 58.21   |            | 61.52   | 59.68    | 63.10   |
|           | 59.24   | 56.78    | 59.68   |            | 62.67   | 61.43    | 63.54   |
|           | 63.54   | 61.29    | 62.91   |            | 63.90   | 64.09    | 64.31   |
|           | 64.98   | 62.89    | 64.39   |            | 64.61   | 64.21    | 66.34   |
|           | 65.04   | 63.39    | 65.79   |            | 69.65   | 68.57    | 68.16   |
|           | 67.57   | 64.85    | 67.01   |            | 70.67   | 69.91    | 70.79   |
|           | 71.60   | 68.56    | 71.26   |            | 72.70   | 70.57    | 72.86   |
|           | 71.87   | 71.39    | 71.43   |            | 72.83   | 71.60    | 72.87   |
|           | 72.55   | 71.63    | 71.47   |            | 73.20   | 72.43    | 73.74   |
|           | 72.56   | 72.17    | 72.90   |            | 73.22   | 72.92    | 73.96   |
|           | 74.06   | 72.60    | 74.36   |            | 73.30   | 73.29    | 74.28   |
|           | 74.20   | 74.06    | 75.05   |            | 75.39   | 75.06    | 75.39   |
|           | 74.23   | 74.10    | 75.50   |            | 81.22   | 75.65    | 82.44   |
|           | 75.62   | 76.01    | 76.00   |            | 82.06   | 80.89    | 82.62   |
|           | 83.35   | 76.22    | 82.87   |            | 84.04   | 83.41    | 84.48   |
|           | 83.53   | 82.96    | 82.99   |            | 84.09   | 83.79    | 85.59   |
|           | 86.69   | 84.09    | 85.72   |            | 86.26   | 85.98    | 85.70   |
|           | 86.70   | 85.86    | 86.09   |            | 86.44   | 86.45    | 86.19   |
|           | 86.86   | 86.33    | 86.95   |            | 88.48   | 86.78    | 87.39   |
|           | 87.38   | 86.81    | 87.06   |            | 88.60   | 88.19    | 87.39   |



---

|        |        |        |        |        |        |
|--------|--------|--------|--------|--------|--------|
| 87.90  | 87.52  | 87.35  | 89.29  | 89.53  | 88.54  |
| 88.99  | 87.57  | 89.15  | 90.79  | 89.86  | 89.63  |
| 89.09  | 89.04  | 89.37  | 93.21  | 90.56  | 91.19  |
| 90.28  | 89.49  | 89.75  | 93.39  | 92.56  | 91.32  |
| 94.23  | 90.63  | 92.75  | 96.24  | 96.11  | 96.03  |
| 94.50  | 93.39  | 93.04  | 96.94  | 96.75  | 96.60  |
| 96.41  | 96.30  | 96.28  | 100.70 | 99.32  | 100.25 |
| 96.96  | 96.86  | 96.78  | 101.25 | 99.84  | 100.77 |
| 101.14 | 97.80  | 100.90 | 101.28 | 100.40 | 100.79 |
| 101.33 | 100.82 | 101.06 | 101.96 | 100.82 | 102.88 |
| 101.35 | 100.94 | 101.11 | 102.35 | 102.03 | 102.92 |
| 101.53 | 101.18 | 101.43 | 102.36 | 102.70 | 102.92 |
| 103.07 | 101.72 | 103.69 | 102.62 | 102.73 | 102.99 |
| 103.08 | 102.91 | 103.97 | 104.47 | 103.45 | 104.75 |
| 103.52 | 103.27 | 104.04 | 104.76 | 104.59 | 106.75 |
| 104.12 | 103.61 | 104.69 | 107.23 | 105.56 | 106.91 |
| 105.88 | 104.20 | 107.58 | 108.52 | 106.91 | 107.87 |
| 108.01 | 107.59 | 108.24 | 108.53 | 107.65 | 107.89 |
| 108.91 | 107.71 | 108.25 | 110.27 | 108.38 | 109.73 |
| 108.99 | 107.91 | 108.91 | 111.19 | 110.02 | 110.26 |
| 109.10 | 108.60 | 108.96 | 111.91 | 110.43 | 111.37 |
| 111.95 | 108.75 | 111.33 | 112.45 | 111.74 | 112.21 |
| 112.34 | 111.12 | 112.08 | 112.74 | 112.07 | 112.66 |
| 112.71 | 111.62 | 112.25 | 112.75 | 112.74 | 112.82 |
| 112.71 | 112.32 | 112.90 | 113.32 | 112.76 | 112.82 |
| 113.03 | 112.93 | 112.97 | 114.01 | 112.87 | 114.19 |
| 113.04 | 112.95 | 113.67 | 114.01 | 113.79 | 114.33 |
| 114.26 | 112.97 | 114.92 | 128.54 | 115.35 | 127.74 |
| 114.26 | 114.15 | 115.36 | 128.62 | 127.96 | 127.75 |
| 128.71 | 115.24 | 127.98 | 128.64 | 128.27 | 127.97 |
| 128.85 | 127.89 | 128.06 | 129.68 | 128.36 | 129.28 |
| 129.14 | 128.59 | 128.10 | 131.30 | 129.42 | 130.32 |
| 129.16 | 128.71 | 128.62 | 131.34 | 130.79 | 130.42 |
| 131.39 | 128.80 | 130.77 | 131.46 | 131.07 | 130.84 |
| 131.89 | 130.30 | 131.31 | 132.32 | 131.12 | 131.10 |
| 132.43 | 131.40 | 131.35 | 132.34 | 131.31 | 131.12 |
| 132.59 | 131.45 | 131.39 | 133.46 | 131.62 | 132.69 |
| 132.60 | 132.00 | 131.43 | 133.47 | 133.01 | 132.81 |
| 133.62 | 132.12 | 132.49 | 134.01 | 133.24 | 132.90 |
| 133.81 | 133.00 | 132.52 | 134.16 | 133.35 | 133.66 |
| 133.82 | 133.36 | 133.13 | 134.37 | 133.72 | 134.02 |
| 133.95 | 133.40 | 133.16 | 135.16 | 133.85 | 135.04 |
| 134.58 | 133.49 | 133.63 | 135.44 | 135.28 | 135.18 |
| 135.55 | 134.03 | 135.22 | 135.44 | 135.39 | 135.21 |

---

---

|        |        |        |        |        |        |
|--------|--------|--------|--------|--------|--------|
| 135.55 | 135.48 | 135.23 | 135.66 | 135.41 | 135.22 |
| 135.70 | 135.52 | 135.37 | 135.98 | 135.49 | 135.73 |
| 136.08 | 135.67 | 135.72 | 136.02 | 135.65 | 135.81 |
| 136.49 | 136.01 | 136.23 | 136.95 | 136.16 | 136.24 |
| 136.88 | 136.46 | 136.80 | 137.15 | 136.74 | 136.79 |
| 136.90 | 136.53 | 136.90 | 137.19 | 136.93 | 136.80 |
| 137.51 | 137.11 | 137.22 | 137.59 | 137.41 | 137.22 |
| 137.51 | 137.50 | 137.47 | 138.16 | 137.92 | 137.81 |
| 137.65 | 137.52 | 137.61 | 139.42 | 138.07 | 138.56 |
| 138.10 | 137.59 | 137.75 | 140.63 | 138.80 | 140.63 |
| 138.16 | 137.87 | 138.11 | 140.67 | 140.57 | 140.69 |
| 140.26 | 138.28 | 138.54 | 140.67 | 140.66 | 140.70 |
| 140.30 | 139.06 | 138.97 | 140.86 | 140.72 | 141.07 |
| 140.71 | 139.66 | 139.08 | 142.61 | 140.96 | 141.49 |
| 140.86 | 139.80 | 140.76 | 142.61 | 140.97 | 141.94 |
| 141.53 | 140.68 | 140.94 | 143.36 | 141.96 | 141.95 |
| 141.56 | 140.93 | 141.08 | 143.54 | 142.30 | 142.54 |
| 142.07 | 140.99 | 141.10 | 143.55 | 142.95 | 142.62 |
| 142.38 | 141.27 | 141.70 | 143.59 | 143.47 | 143.80 |
| 143.40 | 142.26 | 143.56 | 143.61 | 143.82 | 143.81 |
| 143.40 | 143.78 | 143.69 | 145.54 | 143.85 | 144.53 |
| 144.16 | 143.81 | 143.71 | 147.14 | 145.54 | 144.62 |
| 145.45 | 143.95 | 144.44 | 147.28 | 145.83 | 145.48 |
| 145.46 | 144.58 | 144.54 | 148.33 | 146.76 | 147.69 |
| 145.76 | 145.12 | 145.86 | 148.34 | 147.84 | 147.71 |
| 146.09 | 145.82 | 146.41 | 148.64 | 148.33 | 148.60 |
| 146.31 | 146.64 | 146.84 | 151.29 | 148.89 | 149.29 |
| 149.11 | 148.47 | 147.35 | 151.31 | 150.11 | 149.35 |
| 149.11 | 148.50 | 148.31 | 153.08 | 150.87 | 152.13 |
| 151.20 | 149.12 | 148.97 | 157.82 | 153.52 | 157.79 |
| 151.46 | 149.73 | 149.06 | 160.19 | 158.79 | 159.16 |
| 156.28 | 150.60 | 155.62 | 160.25 | 159.65 | 159.28 |
| 157.78 | 156.57 | 156.52 | 161.40 | 159.89 | 159.30 |
| 160.46 | 157.14 | 159.22 | 165.90 | 159.94 | 166.51 |
| 160.57 | 159.46 | 159.48 | 165.90 | 166.56 | 166.52 |
| 165.54 | 159.96 | 164.14 | 167.23 | 166.72 | 166.67 |
| 165.65 | 164.11 | 164.43 | 167.51 | 167.12 | 166.71 |
| 165.80 | 165.42 | 165.22 | 167.52 | 167.41 | 166.83 |
| 167.32 | 165.80 | 166.95 | 168.59 | 167.51 | 167.67 |
| 167.64 | 167.53 | 167.08 | 168.70 | 168.35 | 168.04 |
| 167.64 | 167.62 | 167.19 | 170.19 | 168.41 | 168.75 |
| 168.17 | 167.95 | 168.23 | 170.24 | 169.13 | 168.79 |
| 168.98 | 168.65 | 168.26 | 171.67 | 169.79 | 172.13 |
| 169.46 | 168.74 | 168.47 | 176.47 | 173.05 | 176.20 |

---

---

|        |        |        |        |        |        |
|--------|--------|--------|--------|--------|--------|
| 169.57 | 168.76 | 170.19 | 177.05 | 176.64 | 176.45 |
| 175.91 | 169.93 | 175.00 | 177.48 | 177.26 | 177.12 |
| 176.69 | 175.91 | 176.42 | 177.48 | 177.45 | 177.17 |
| 177.11 | 176.96 | 176.50 | 181.60 | 178.00 | 180.41 |
| 177.12 | 177.15 | 177.11 | 181.91 | 181.37 | 180.96 |
| 182.22 | 177.93 | 180.49 | 184.72 | 181.48 | 182.39 |
| 182.23 | 181.97 | 181.24 | 184.75 | 183.80 | 182.52 |
| 183.96 | 181.99 | 181.59 | 184.96 | 183.88 | 183.03 |
| 185.06 | 183.53 | 182.45 | 185.99 | 184.16 | 185.57 |
| 185.11 | 183.75 | 182.76 | 190.26 | 186.87 | 187.30 |
| 186.12 | 183.98 | 184.67 | 190.43 | 188.65 | 187.68 |
| 187.48 | 186.39 | 185.52 | 190.45 | 188.99 | 189.04 |
| 188.85 | 186.69 | 186.58 | 190.92 | 190.04 | 189.56 |
| 189.19 | 186.95 | 186.80 | 192.27 | 190.46 | 191.23 |
| 190.85 | 188.01 | 188.10 | 192.66 | 192.14 | 191.54 |
| 191.15 | 189.02 | 188.36 | 192.75 | 192.52 | 191.68 |
| 191.37 | 189.44 | 188.83 | 192.79 | 192.55 | 192.23 |
| 193.10 | 190.89 | 190.29 | 192.93 | 192.58 | 192.29 |
| 193.36 | 192.76 | 192.23 | 194.69 | 193.00 | 192.76 |
| 193.45 | 192.95 | 192.39 | 194.69 | 194.62 | 193.86 |
| 194.52 | 193.11 | 192.57 | 205.20 | 194.75 | 194.43 |
| 194.54 | 194.66 | 193.92 | 205.72 | 205.07 | 204.34 |
| 204.50 | 194.83 | 194.20 | 205.75 | 205.64 | 205.50 |
| 205.31 | 204.67 | 204.48 | 206.77 | 206.12 | 205.58 |
| 206.01 | 205.40 | 204.72 | 209.86 | 207.04 | 206.73 |
| 206.05 | 205.63 | 205.46 | 210.10 | 209.45 | 208.76 |
| 209.41 | 205.84 | 205.53 | 210.10 | 209.53 | 209.09 |
| 210.50 | 209.22 | 208.54 | 210.84 | 210.17 | 209.09 |
| 210.50 | 209.99 | 209.51 | 212.89 | 211.01 | 210.39 |
| 211.28 | 210.63 | 209.51 | 212.90 | 212.03 | 211.39 |
| 212.37 | 211.02 | 210.74 | 216.74 | 212.06 | 211.41 |
| 212.40 | 211.34 | 210.74 | 217.23 | 216.74 | 215.94 |
| 216.62 | 211.41 | 210.83 | 217.23 | 217.18 | 216.42 |
| 217.26 | 216.73 | 216.40 | 217.74 | 217.21 | 216.94 |
| 217.26 | 217.18 | 216.42 | 217.95 | 217.30 | 216.95 |
| 217.67 | 217.25 | 217.06 | 218.22 | 217.76 | 217.17 |
| 218.29 | 217.62 | 217.07 | 219.67 | 218.29 | 217.44 |
| 218.95 | 217.64 | 217.59 | 219.69 | 219.51 | 219.03 |
| 219.22 | 217.79 | 217.69 | 220.06 | 219.63 | 219.08 |
| 219.31 | 218.34 | 217.74 | 220.50 | 220.64 | 220.68 |
| 219.50 | 218.97 | 217.84 | 231.87 | 221.55 | 221.50 |
| 220.31 | 220.09 | 220.00 | 232.11 | 227.48 | 226.89 |
| 222.95 | 221.16 | 220.15 | 235.38 | 229.55 | 226.98 |
| 223.14 | 221.58 | 220.19 | 235.66 | 235.51 | 234.97 |

---

|            |         |          |         |            |         |          |         |
|------------|---------|----------|---------|------------|---------|----------|---------|
|            | 231.36  | 221.65   | 221.29  |            | 235.67  | 235.59   | 235.08  |
|            | 235.97  | 231.22   | 231.37  |            | 235.89  | 235.67   | 235.10  |
|            | 235.97  | 235.80   | 235.39  |            | 237.37  | 235.69   | 235.11  |
|            | 235.98  | 235.89   | 235.46  |            | 237.38  | 236.96   | 236.32  |
|            | 236.71  | 235.98   | 235.48  |            | 237.60  | 237.02   | 236.33  |
|            | 237.07  | 236.85   | 236.25  |            | 238.13  | 237.70   | 237.46  |
|            | 237.08  | 236.91   | 236.35  |            | 238.77  | 238.32   | 237.93  |
|            | 237.60  | 236.92   | 236.37  |            | 238.80  | 238.55   | 237.98  |
|            | 238.36  | 237.96   | 237.77  |            | 238.87  | 238.77   | 238.03  |
|            | 238.63  | 238.57   | 238.18  |            | 238.89  | 238.97   | 238.15  |
|            | 238.64  | 238.77   | 238.26  |            | 245.19  | 239.14   | 238.91  |
|            | 238.68  | 238.87   | 238.29  |            | 245.21  | 245.35   | 245.03  |
|            | 244.45  | 239.10   | 238.40  |            | 245.21  | 245.53   | 245.43  |
|            | 244.85  | 244.54   | 243.90  |            | 246.01  | 245.87   | 245.44  |
|            | 244.86  | 244.92   | 244.40  |            | 246.41  | 246.10   | 245.50  |
|            | 245.08  | 245.00   | 244.76  |            | 246.42  | 246.33   | 245.79  |
|            | 245.69  | 245.02   | 244.77  |            | 246.44  | 246.44   | 245.91  |
|            | 245.69  | 245.84   | 245.58  |            | 246.44  | 246.46   | 245.95  |
|            | 246.26  | 246.32   | 245.59  |            | 249.03  | 246.60   | 246.13  |
|            | 246.50  | 246.39   | 245.66  |            | 249.86  | 249.22   | 249.29  |
|            | 248.59  | 246.80   | 246.57  |            | 249.88  | 249.38   | 249.32  |
|            | 249.01  | 248.69   | 247.95  |            | 251.25  | 249.47   | 249.43  |
|            | 249.01  | 248.83   | 248.12  |            | 251.47  | 251.35   | 250.69  |
|            | 251.26  | 248.89   | 248.13  |            | 252.15  | 251.71   | 250.73  |
|            | 251.29  | 251.44   | 250.96  |            | 252.15  | 251.92   | 251.28  |
|            | 252.02  | 252.21   | 251.44  |            | 261.12  | 252.49   | 251.29  |
|            | 252.02  | 252.34   | 251.75  |            | 261.16  | 261.05   | 260.65  |
|            | 260.62  | 252.81   | 251.76  |            | 262.59  | 261.61   | 261.22  |
|            | 261.46  | 260.82   | 260.29  |            | 262.62  | 262.39   | 262.27  |
|            | 261.61  | 261.83   | 261.58  |            | 485.60  | 262.57   | 262.28  |
|            | 261.62  | 261.99   | 261.71  |            | 3563.96 | 3579.31  | 3519.03 |
|            | 488.14  | 262.02   | 261.75  | Ti/Cu(110) | 25.95   | -1726.58 | 28.91   |
|            | 3554.75 | 3567.66  | 3513.66 |            | 29.85   | 34.33    | 33.47   |
| Ta/Cu(100) | 47.23   | -1687.70 | 39.36   |            | 33.54   | 35.61    | 35.94   |
|            | 48.48   | 45.34    | 43.92   |            | 39.36   | 48.84    | 36.94   |
|            | 50.34   | 48.58    | 49.43   |            | 47.94   | 49.32    | 49.21   |
|            | 50.37   | 49.10    | 50.36   |            | 48.05   | 51.30    | 49.48   |
|            | 56.66   | 51.03    | 51.93   |            | 49.54   | 63.64    | 52.49   |
|            | 56.68   | 55.02    | 54.38   |            | 62.54   | 63.93    | 63.71   |
|            | 57.74   | 56.55    | 56.49   |            | 63.28   | 65.98    | 64.78   |
|            | 58.38   | 57.57    | 57.15   |            | 63.44   | 66.25    | 66.14   |
|            | 61.65   | 58.53    | 58.90   |            | 65.67   | 71.73    | 67.46   |
|            | 61.69   | 59.81    | 59.79   |            | 70.97   | 72.23    | 71.63   |
|            | 64.85   | 61.35    | 61.60   |            | 71.33   | 72.24    | 72.16   |

---

|        |        |        |        |        |        |
|--------|--------|--------|--------|--------|--------|
| 65.28  | 63.40  | 63.64  | 72.16  | 72.85  | 72.70  |
| 72.83  | 65.00  | 64.00  | 72.48  | 77.48  | 72.91  |
| 75.27  | 69.33  | 70.16  | 77.51  | 78.68  | 77.91  |
| 75.29  | 72.37  | 71.65  | 77.90  | 79.11  | 77.98  |
| 76.44  | 74.43  | 75.03  | 78.24  | 80.39  | 78.79  |
| 77.38  | 75.64  | 77.28  | 78.92  | 82.98  | 80.89  |
| 77.43  | 76.69  | 77.41  | 82.09  | 84.02  | 82.99  |
| 77.53  | 77.40  | 77.59  | 83.84  | 88.51  | 84.14  |
| 77.59  | 77.50  | 78.05  | 90.49  | 90.56  | 90.47  |
| 81.04  | 77.80  | 78.21  | 90.80  | 93.01  | 91.04  |
| 81.10  | 78.05  | 79.07  | 91.51  | 93.69  | 93.53  |
| 84.25  | 79.93  | 80.60  | 93.54  | 94.02  | 95.33  |
| 84.28  | 82.53  | 82.36  | 94.66  | 97.52  | 95.60  |
| 86.56  | 83.73  | 83.34  | 95.42  | 98.14  | 96.68  |
| 87.23  | 85.14  | 85.11  | 97.92  | 98.18  | 98.30  |
| 90.37  | 86.70  | 86.37  | 98.12  | 99.21  | 99.65  |
| 90.37  | 87.32  | 88.08  | 98.45  | 100.21 | 101.24 |
| 93.88  | 89.37  | 88.18  | 105.77 | 105.19 | 105.27 |
| 94.75  | 90.37  | 92.50  | 106.03 | 107.58 | 106.11 |
| 95.74  | 92.33  | 92.76  | 108.28 | 108.18 | 107.60 |
| 95.78  | 94.42  | 93.79  | 108.44 | 108.63 | 108.32 |
| 96.57  | 94.72  | 94.25  | 108.60 | 109.01 | 108.46 |
| 96.89  | 95.85  | 95.62  | 109.17 | 109.43 | 109.51 |
| 97.41  | 96.31  | 96.23  | 109.42 | 109.99 | 109.60 |
| 103.29 | 97.05  | 96.68  | 110.04 | 110.69 | 110.12 |
| 104.00 | 97.21  | 97.01  | 110.51 | 110.83 | 110.79 |
| 104.00 | 100.07 | 102.96 | 110.56 | 111.04 | 111.86 |
| 104.37 | 102.55 | 102.99 | 113.42 | 113.36 | 113.28 |
| 104.64 | 103.13 | 103.20 | 113.42 | 114.79 | 114.91 |
| 104.68 | 104.15 | 103.88 | 114.54 | 115.68 | 114.94 |
| 104.72 | 104.26 | 104.60 | 115.87 | 116.19 | 115.78 |
| 104.77 | 104.51 | 104.63 | 115.91 | 116.58 | 116.86 |
| 105.96 | 104.91 | 104.91 | 116.11 | 120.14 | 117.39 |
| 105.99 | 105.06 | 104.98 | 119.81 | 120.24 | 118.42 |
| 106.02 | 105.18 | 105.82 | 120.19 | 120.86 | 118.54 |
| 109.84 | 105.96 | 105.99 | 127.63 | 128.73 | 127.32 |
| 112.52 | 106.20 | 106.01 | 128.09 | 128.99 | 128.25 |
| 113.76 | 107.04 | 109.58 | 129.07 | 129.61 | 128.98 |
| 113.93 | 109.92 | 112.57 | 130.84 | 130.53 | 130.33 |
| 113.94 | 112.34 | 112.87 | 133.01 | 134.14 | 133.70 |
| 113.95 | 113.12 | 113.21 | 133.78 | 134.35 | 133.81 |
| 115.54 | 113.64 | 113.35 | 134.06 | 135.03 | 134.73 |
| 115.99 | 114.08 | 113.66 | 135.91 | 135.31 | 135.12 |
| 115.99 | 114.46 | 114.15 | 136.09 | 136.45 | 136.05 |

---

---

|        |        |        |        |        |        |
|--------|--------|--------|--------|--------|--------|
| 126.44 | 115.74 | 115.95 | 136.73 | 137.39 | 136.68 |
| 126.95 | 116.04 | 116.76 | 137.96 | 137.44 | 137.05 |
| 126.96 | 116.85 | 126.08 | 138.05 | 137.71 | 137.76 |
| 127.25 | 126.20 | 126.12 | 138.57 | 139.91 | 139.50 |
| 128.86 | 126.72 | 126.48 | 140.31 | 140.23 | 140.17 |
| 131.28 | 127.16 | 128.54 | 140.73 | 141.93 | 140.49 |
| 132.93 | 128.68 | 130.67 | 141.91 | 143.03 | 142.54 |
| 133.34 | 131.24 | 131.83 | 143.57 | 144.56 | 143.75 |
| 133.37 | 132.26 | 131.91 | 143.94 | 145.08 | 144.18 |
| 133.76 | 132.77 | 131.95 | 144.69 | 145.24 | 145.07 |
| 133.79 | 132.91 | 132.53 | 146.18 | 146.53 | 146.02 |
| 133.86 | 133.58 | 133.08 | 146.70 | 147.12 | 147.29 |
| 134.05 | 133.63 | 133.17 | 147.63 | 149.02 | 147.77 |
| 135.48 | 133.69 | 133.33 | 149.57 | 150.00 | 149.42 |
| 135.49 | 133.93 | 134.37 | 149.60 | 150.04 | 149.88 |
| 135.53 | 135.32 | 134.56 | 149.88 | 151.48 | 149.91 |
| 135.68 | 135.36 | 134.80 | 151.73 | 152.25 | 150.52 |
| 136.07 | 135.38 | 135.02 | 152.52 | 152.86 | 152.26 |
| 136.08 | 135.60 | 135.12 | 154.17 | 155.86 | 155.10 |
| 136.21 | 135.68 | 135.41 | 155.93 | 156.33 | 155.95 |
| 136.41 | 135.85 | 135.49 | 156.64 | 157.33 | 156.85 |
| 137.23 | 135.96 | 135.56 | 157.60 | 158.48 | 157.66 |
| 137.33 | 136.23 | 136.50 | 158.16 | 158.70 | 159.04 |
| 137.34 | 136.84 | 136.58 | 160.91 | 161.00 | 160.53 |
| 138.68 | 136.92 | 136.83 | 164.30 | 165.01 | 163.76 |
| 138.93 | 137.26 | 137.90 | 164.81 | 165.28 | 164.73 |
| 139.41 | 138.62 | 138.17 | 169.22 | 169.06 | 168.25 |
| 140.97 | 138.65 | 138.39 | 173.88 | 173.85 | 172.35 |
| 140.98 | 139.39 | 140.57 | 175.85 | 175.94 | 173.74 |
| 141.23 | 140.89 | 140.60 | 176.61 | 176.79 | 175.50 |
| 141.37 | 140.94 | 140.87 | 177.32 | 177.43 | 175.83 |
| 141.87 | 141.01 | 141.29 | 179.25 | 179.15 | 176.72 |
| 141.89 | 141.33 | 141.29 | 179.55 | 180.08 | 178.88 |
| 143.27 | 141.54 | 141.61 | 179.83 | 180.81 | 180.29 |
| 143.28 | 141.58 | 142.19 | 182.85 | 183.72 | 180.64 |
| 144.99 | 143.40 | 143.21 | 183.94 | 184.60 | 183.17 |
| 145.34 | 143.41 | 143.34 | 184.13 | 184.98 | 184.31 |
| 145.53 | 143.44 | 143.49 | 185.11 | 185.10 | 184.58 |
| 145.69 | 145.08 | 143.51 | 185.32 | 185.86 | 184.63 |
| 145.83 | 145.29 | 144.25 | 185.32 | 186.15 | 185.22 |
| 149.21 | 145.50 | 144.47 | 185.81 | 187.04 | 185.70 |
| 149.22 | 146.29 | 147.49 | 186.50 | 188.12 | 185.99 |
| 149.80 | 148.65 | 147.53 | 187.74 | 188.32 | 187.36 |
| 149.82 | 149.26 | 149.19 | 188.48 | 188.63 | 187.63 |

---

---

|        |        |        |        |        |        |
|--------|--------|--------|--------|--------|--------|
| 152.09 | 149.88 | 149.56 | 188.64 | 188.86 | 187.69 |
| 152.11 | 150.04 | 149.89 | 191.18 | 192.18 | 188.64 |
| 154.49 | 151.21 | 149.89 | 191.24 | 193.13 | 192.06 |
| 158.69 | 151.36 | 153.67 | 193.51 | 193.93 | 192.35 |
| 158.71 | 154.80 | 157.48 | 196.13 | 196.15 | 192.71 |
| 159.00 | 158.36 | 157.56 | 196.54 | 196.33 | 194.59 |
| 163.05 | 158.56 | 158.83 | 197.42 | 197.64 | 195.87 |
| 165.96 | 159.98 | 160.14 | 201.76 | 201.33 | 196.32 |
| 166.06 | 161.47 | 164.85 | 203.28 | 205.59 | 200.31 |
| 168.40 | 164.98 | 164.90 | 210.02 | 210.18 | 203.79 |
| 169.56 | 166.43 | 167.85 | 211.32 | 211.23 | 208.87 |
| 169.56 | 168.52 | 168.24 | 211.39 | 211.43 | 209.98 |
| 169.66 | 168.87 | 168.31 | 211.57 | 211.65 | 210.31 |
| 169.70 | 169.35 | 168.67 | 211.88 | 211.80 | 211.44 |
| 169.95 | 169.57 | 168.70 | 212.76 | 213.49 | 212.05 |
| 172.52 | 169.68 | 168.74 | 213.19 | 213.60 | 212.26 |
| 172.53 | 169.71 | 171.02 | 213.43 | 214.00 | 212.51 |
| 176.64 | 172.68 | 171.96 | 214.73 | 214.83 | 213.11 |
| 178.37 | 173.02 | 175.77 | 215.99 | 216.13 | 214.49 |
| 178.39 | 176.84 | 177.21 | 218.19 | 217.18 | 215.44 |
| 180.00 | 178.28 | 177.34 | 219.11 | 219.56 | 215.63 |
| 180.40 | 178.33 | 179.21 | 219.35 | 220.00 | 218.50 |
| 181.66 | 180.23 | 179.46 | 220.67 | 220.36 | 219.60 |
| 181.77 | 180.57 | 179.73 | 221.33 | 221.20 | 219.68 |
| 183.54 | 181.14 | 179.88 | 221.80 | 222.18 | 220.71 |
| 187.53 | 181.34 | 181.93 | 222.67 | 222.89 | 221.28 |
| 187.64 | 183.01 | 185.57 | 224.97 | 223.41 | 221.61 |
| 187.70 | 187.07 | 186.01 | 227.01 | 227.12 | 223.62 |
| 189.33 | 187.38 | 187.94 | 228.85 | 228.81 | 226.85 |
| 190.90 | 188.73 | 189.83 | 231.03 | 231.17 | 228.28 |
| 192.74 | 190.58 | 190.34 | 232.72 | 233.25 | 230.27 |
| 193.28 | 192.55 | 191.74 | 233.25 | 233.39 | 232.53 |
| 193.81 | 193.35 | 192.45 | 233.27 | 233.62 | 232.66 |
| 193.82 | 193.50 | 192.54 | 233.48 | 233.70 | 233.32 |
| 194.23 | 193.51 | 192.58 | 235.49 | 234.73 | 233.80 |
| 194.70 | 194.21 | 192.76 | 239.12 | 238.65 | 234.78 |
| 195.67 | 194.33 | 193.50 | 239.26 | 239.46 | 238.59 |
| 196.15 | 194.70 | 193.79 | 239.65 | 239.67 | 238.93 |
| 196.21 | 196.06 | 194.64 | 240.31 | 239.92 | 239.22 |
| 205.27 | 196.16 | 198.84 | 240.78 | 240.79 | 239.46 |
| 205.29 | 205.52 | 205.10 | 242.95 | 242.58 | 240.69 |
| 206.20 | 205.91 | 205.29 | 243.96 | 244.58 | 241.38 |
| 206.45 | 206.01 | 205.56 | 429.25 | 249.73 | 244.52 |
| 210.12 | 206.59 | 206.10 | 489.04 | 379.48 | 366.67 |

---

---

|        |        |        |           |         |          |         |
|--------|--------|--------|-----------|---------|----------|---------|
| 210.12 | 209.69 | 208.92 |           | 893.65  | 406.45   | 497.38  |
| 210.69 | 210.20 | 208.93 |           | 3538.42 | 3562.63  | 3510.03 |
| 211.77 | 210.29 | 209.24 | V/Cu(110) | 23.67   | -1223.44 | 22.48   |
| 212.72 | 211.86 | 211.07 |           | 24.34   | 25.08    | 23.89   |
| 212.74 | 212.08 | 211.61 |           | 28.12   | 28.67    | 24.07   |
| 216.54 | 212.30 | 211.62 |           | 45.75   | 30.36    | 29.71   |
| 217.25 | 216.59 | 215.60 |           | 46.89   | 46.28    | 38.59   |
| 217.26 | 216.77 | 216.31 |           | 58.23   | 49.39    | 46.63   |
| 217.43 | 217.07 | 216.35 |           | 58.81   | 58.55    | 49.61   |
| 218.02 | 217.34 | 217.15 |           | 59.03   | 59.25    | 57.90   |
| 218.38 | 217.91 | 217.50 |           | 60.44   | 59.62    | 58.64   |
| 218.46 | 218.46 | 218.05 |           | 61.55   | 60.83    | 58.88   |
| 219.54 | 218.58 | 218.19 |           | 62.17   | 62.24    | 62.19   |
| 220.63 | 220.35 | 218.80 |           | 64.15   | 62.42    | 62.36   |
| 221.63 | 220.49 | 219.75 |           | 64.63   | 64.63    | 62.65   |
| 227.98 | 222.82 | 221.22 |           | 65.45   | 65.61    | 64.38   |
| 228.18 | 226.61 | 225.05 |           | 66.45   | 66.62    | 64.81   |
| 237.31 | 227.51 | 225.11 |           | 66.52   | 66.72    | 66.65   |
| 237.32 | 236.93 | 236.20 |           | 68.59   | 68.34    | 66.83   |
| 237.87 | 237.04 | 236.21 |           | 72.20   | 68.37    | 67.53   |
| 238.21 | 237.70 | 236.61 |           | 73.46   | 72.29    | 68.92   |
| 238.72 | 237.86 | 236.93 |           | 81.92   | 73.94    | 71.43   |
| 238.73 | 238.45 | 237.47 |           | 85.38   | 83.62    | 73.17   |
| 239.32 | 238.50 | 237.48 |           | 88.61   | 87.52    | 86.30   |
| 239.55 | 239.03 | 238.16 |           | 89.20   | 88.25    | 88.20   |
| 242.99 | 239.23 | 238.57 |           | 89.65   | 90.58    | 88.97   |
| 243.00 | 242.30 | 241.15 |           | 92.29   | 91.38    | 90.56   |
| 243.67 | 242.43 | 241.19 |           | 94.09   | 93.88    | 90.79   |
| 244.42 | 243.72 | 242.79 |           | 94.97   | 94.94    | 93.03   |
| 246.13 | 244.35 | 243.40 |           | 95.22   | 95.30    | 94.06   |
| 246.13 | 246.07 | 245.90 |           | 95.23   | 95.54    | 95.35   |
| 246.53 | 246.13 | 245.94 |           | 96.11   | 95.93    | 95.78   |
| 246.90 | 246.20 | 245.98 |           | 101.46  | 100.84   | 99.83   |
| 247.49 | 246.63 | 246.13 |           | 101.46  | 101.30   | 100.06  |
| 247.53 | 247.41 | 246.30 |           | 103.25  | 102.07   | 101.26  |
| 247.88 | 247.61 | 246.34 |           | 103.35  | 103.11   | 101.55  |
| 249.10 | 248.00 | 246.86 |           | 103.59  | 103.14   | 102.13  |
| 251.66 | 249.26 | 248.15 |           | 104.12  | 103.67   | 103.09  |
| 251.74 | 251.54 | 250.89 |           | 104.20  | 103.74   | 103.27  |
| 255.56 | 251.70 | 250.91 |           | 104.31  | 104.51   | 104.36  |
| 256.47 | 255.18 | 254.32 |           | 105.49  | 105.96   | 104.46  |
| 256.47 | 255.84 | 255.15 |           | 106.00  | 106.07   | 104.83  |
| 257.07 | 256.31 | 255.19 |           | 106.50  | 106.63   | 105.81  |
| 259.80 | 256.74 | 255.55 |           | 106.82  | 106.64   | 106.40  |

---



|            |         |          |         |        |        |        |
|------------|---------|----------|---------|--------|--------|--------|
|            | 263.57  | 259.31   | 258.24  | 107.60 | 107.24 | 106.78 |
|            | 263.96  | 263.75   | 263.19  | 108.37 | 107.63 | 106.82 |
|            | 264.07  | 263.90   | 263.22  | 108.39 | 108.31 | 107.23 |
|            | 264.16  | 263.94   | 263.43  | 109.24 | 108.82 | 107.49 |
|            | 506.85  | 264.13   | 263.57  | 110.25 | 109.18 | 108.38 |
|            | 3595.96 | 3571.55  | 3496.28 | 111.67 | 111.48 | 110.88 |
| Zr/Cu(110) | 21.87   | -1532.38 | 19.97   | 113.20 | 112.77 | 111.32 |
|            | 26.25   | 24.59    | 20.74   | 114.78 | 114.69 | 111.45 |
|            | 29.34   | 30.76    | 27.45   | 116.49 | 115.53 | 113.80 |
|            | 41.37   | 42.93    | 29.72   | 118.49 | 116.50 | 114.41 |
|            | 42.88   | 43.66    | 43.69   | 118.72 | 117.75 | 116.74 |
|            | 49.10   | 50.28    | 44.59   | 122.78 | 121.91 | 121.64 |
|            | 51.59   | 53.92    | 50.07   | 124.65 | 124.46 | 123.83 |
|            | 56.44   | 58.27    | 53.93   | 127.43 | 127.28 | 126.81 |
|            | 58.70   | 59.31    | 59.38   | 128.91 | 128.05 | 126.84 |
|            | 62.37   | 61.54    | 59.96   | 128.96 | 129.41 | 128.16 |
|            | 62.79   | 62.78    | 62.18   | 129.27 | 129.50 | 128.55 |
|            | 62.98   | 63.73    | 62.42   | 129.64 | 129.61 | 128.82 |
|            | 64.95   | 64.55    | 63.47   | 129.85 | 129.80 | 128.93 |
|            | 65.88   | 66.00    | 63.99   | 130.80 | 130.45 | 129.61 |
|            | 71.46   | 71.99    | 65.76   | 131.88 | 132.44 | 132.19 |
|            | 72.24   | 72.55    | 72.32   | 132.76 | 133.45 | 132.26 |
|            | 73.13   | 73.67    | 72.64   | 133.97 | 134.12 | 133.08 |
|            | 73.51   | 74.12    | 73.72   | 136.24 | 136.19 | 135.43 |
|            | 73.58   | 74.15    | 73.74   | 136.34 | 136.86 | 135.66 |
|            | 75.65   | 75.74    | 74.32   | 137.66 | 137.47 | 136.35 |
|            | 79.95   | 84.10    | 75.71   | 137.71 | 137.97 | 137.30 |
|            | 84.95   | 85.04    | 85.60   | 139.12 | 138.74 | 138.36 |
|            | 86.37   | 86.50    | 86.02   | 139.39 | 139.34 | 138.49 |
|            | 88.39   | 88.29    | 87.77   | 140.19 | 140.35 | 139.05 |
|            | 88.87   | 88.96    | 88.84   | 140.50 | 140.36 | 139.28 |
|            | 89.05   | 90.44    | 90.92   | 141.33 | 140.64 | 139.70 |
|            | 93.40   | 92.88    | 92.45   | 141.60 | 140.78 | 140.08 |
|            | 93.74   | 93.71    | 92.86   | 142.21 | 142.01 | 140.09 |
|            | 94.01   | 93.79    | 93.51   | 142.53 | 142.02 | 141.82 |
|            | 94.28   | 95.89    | 94.43   | 146.89 | 146.38 | 145.36 |
|            | 99.26   | 97.72    | 97.39   | 147.01 | 147.10 | 145.39 |
|            | 99.40   | 99.91    | 97.67   | 147.68 | 147.28 | 145.73 |
|            | 99.97   | 99.93    | 99.29   | 148.12 | 148.33 | 146.67 |
|            | 100.35  | 100.81   | 99.52   | 149.90 | 149.55 | 148.15 |
|            | 100.79  | 101.10   | 100.82  | 150.92 | 151.43 | 148.32 |
|            | 101.77  | 101.83   | 101.57  | 155.09 | 155.24 | 154.28 |
|            | 102.27  | 101.98   | 101.66  | 156.88 | 157.05 | 156.24 |
|            | 102.32  | 102.33   | 101.92  | 161.13 | 160.70 | 159.43 |

---

|        |        |        |        |        |        |
|--------|--------|--------|--------|--------|--------|
| 104.87 | 104.43 | 103.41 | 162.22 | 162.68 | 161.34 |
| 105.13 | 105.00 | 104.11 | 163.07 | 162.82 | 161.93 |
| 106.04 | 105.67 | 105.47 | 163.21 | 163.06 | 162.56 |
| 106.48 | 105.81 | 105.66 | 168.75 | 169.93 | 163.55 |
| 106.99 | 107.08 | 106.03 | 170.27 | 170.22 | 168.83 |
| 107.78 | 107.81 | 107.34 | 170.68 | 170.47 | 168.96 |
| 108.13 | 108.46 | 107.37 | 171.37 | 170.49 | 169.30 |
| 108.83 | 110.38 | 107.86 | 171.52 | 171.48 | 169.64 |
| 112.06 | 111.70 | 110.50 | 173.24 | 172.82 | 170.77 |
| 113.60 | 113.18 | 111.96 | 174.59 | 174.60 | 173.01 |
| 114.88 | 115.42 | 115.54 | 175.71 | 174.68 | 173.81 |
| 117.16 | 117.47 | 117.24 | 175.99 | 175.59 | 174.26 |
| 119.19 | 119.48 | 118.68 | 177.05 | 175.82 | 174.90 |
| 123.07 | 122.33 | 121.83 | 177.84 | 177.20 | 175.26 |
| 125.04 | 125.46 | 124.76 | 180.09 | 178.86 | 175.51 |
| 126.08 | 125.99 | 125.67 | 181.74 | 181.17 | 177.80 |
| 126.23 | 126.20 | 125.79 | 184.51 | 184.52 | 180.24 |
| 126.54 | 126.51 | 126.41 | 186.35 | 185.58 | 183.25 |
| 127.43 | 127.12 | 126.82 | 188.44 | 188.34 | 184.13 |
| 127.80 | 127.36 | 127.01 | 191.77 | 188.87 | 186.58 |
| 128.08 | 128.25 | 128.65 | 192.20 | 191.88 | 187.57 |
| 130.76 | 129.46 | 129.31 | 193.54 | 192.89 | 190.95 |
| 131.42 | 131.71 | 130.81 | 194.60 | 194.52 | 191.52 |
| 131.70 | 132.22 | 131.69 | 197.15 | 197.78 | 192.89 |
| 133.46 | 133.71 | 131.95 | 202.18 | 201.87 | 196.09 |
| 134.30 | 134.73 | 133.41 | 202.26 | 201.95 | 200.96 |
| 135.16 | 135.31 | 133.99 | 202.35 | 202.43 | 201.01 |
| 136.34 | 136.71 | 136.09 | 203.06 | 202.52 | 201.37 |
| 136.71 | 136.76 | 136.49 | 203.63 | 204.20 | 202.21 |
| 136.75 | 137.34 | 136.59 | 205.00 | 204.57 | 202.64 |
| 138.50 | 138.42 | 137.65 | 206.05 | 205.83 | 203.21 |
| 140.42 | 139.60 | 138.03 | 207.62 | 206.73 | 204.77 |
| 140.45 | 140.58 | 138.25 | 208.37 | 207.15 | 204.96 |
| 140.46 | 140.71 | 140.05 | 210.30 | 210.52 | 206.77 |
| 141.00 | 140.79 | 140.10 | 211.32 | 211.92 | 209.48 |
| 143.03 | 143.09 | 140.37 | 212.44 | 211.99 | 210.65 |
| 144.86 | 144.27 | 142.79 | 215.11 | 214.85 | 211.88 |
| 146.06 | 146.15 | 143.25 | 216.32 | 216.83 | 213.05 |
| 147.87 | 148.17 | 146.24 | 217.84 | 217.52 | 215.54 |
| 149.23 | 148.31 | 146.77 | 218.05 | 217.77 | 216.55 |
| 149.70 | 150.93 | 148.37 | 218.40 | 218.19 | 216.68 |
| 151.75 | 151.38 | 150.84 | 219.74 | 219.77 | 217.28 |
| 154.52 | 152.22 | 151.99 | 221.72 | 221.31 | 218.22 |
| 154.81 | 154.23 | 153.21 | 222.42 | 222.06 | 219.79 |

---

---

|        |        |        |            |         |          |         |
|--------|--------|--------|------------|---------|----------|---------|
| 155.97 | 156.44 | 153.41 |            | 222.93  | 222.16   | 221.92  |
| 161.49 | 160.51 | 156.38 |            | 223.42  | 223.01   | 222.05  |
| 166.16 | 165.47 | 160.07 |            | 223.75  | 223.57   | 222.14  |
| 167.17 | 166.53 | 165.68 |            | 225.69  | 225.40   | 222.53  |
| 167.86 | 168.04 | 166.78 |            | 226.16  | 225.87   | 224.54  |
| 168.17 | 168.25 | 166.99 |            | 226.45  | 226.31   | 224.94  |
| 172.27 | 168.48 | 167.95 |            | 226.71  | 226.58   | 225.14  |
| 172.90 | 172.56 | 172.18 |            | 228.28  | 227.82   | 225.81  |
| 172.95 | 173.32 | 172.86 |            | 228.86  | 229.01   | 226.99  |
| 173.26 | 174.02 | 173.53 |            | 230.26  | 230.36   | 228.85  |
| 174.74 | 174.63 | 173.80 |            | 233.72  | 233.63   | 229.39  |
| 175.12 | 175.13 | 174.79 |            | 235.34  | 235.67   | 233.24  |
| 175.66 | 175.18 | 174.83 |            | 236.70  | 236.46   | 234.54  |
| 176.58 | 175.73 | 175.32 |            | 403.72  | 264.04   | 235.26  |
| 176.86 | 176.59 | 175.58 |            | 482.94  | 387.61   | 378.93  |
| 178.39 | 177.71 | 175.87 |            | 955.68  | 410.05   | 510.89  |
| 179.16 | 178.85 | 178.31 |            | 3551.13 | 3560.41  | 3505.43 |
| 180.58 | 179.74 | 178.91 | Hf/Cu(110) | 30.16   | -2132.66 | 31.34   |
| 181.19 | 180.35 | 179.27 |            | 30.69   | 31.60    | 31.40   |
| 181.31 | 181.58 | 179.51 |            | 31.22   | 31.82    | 39.38   |
| 182.03 | 181.81 | 181.07 |            | 32.44   | 42.34    | 43.55   |
| 183.63 | 182.62 | 181.18 |            | 40.54   | 44.60    | 48.88   |
| 185.55 | 183.93 | 182.22 |            | 43.04   | 50.50    | 50.95   |
| 188.16 | 185.32 | 184.55 |            | 49.18   | 58.08    | 54.37   |
| 191.73 | 188.54 | 188.07 |            | 56.76   | 59.10    | 59.70   |
| 195.01 | 191.43 | 189.81 |            | 58.25   | 59.95    | 61.66   |
| 196.64 | 193.90 | 192.28 |            | 58.56   | 63.44    | 63.17   |
| 203.34 | 198.18 | 196.91 |            | 63.24   | 63.73    | 63.54   |
| 204.72 | 204.13 | 203.09 |            | 64.19   | 64.38    | 64.01   |
| 205.87 | 204.67 | 204.36 |            | 64.21   | 64.47    | 64.41   |
| 205.99 | 205.67 | 204.39 |            | 65.45   | 67.42    | 65.54   |
| 207.05 | 205.95 | 205.06 |            | 67.27   | 69.34    | 66.85   |
| 208.08 | 207.18 | 207.01 |            | 67.45   | 72.35    | 70.20   |
| 208.17 | 207.76 | 207.52 |            | 71.89   | 72.68    | 72.62   |
| 208.70 | 208.43 | 208.21 |            | 73.26   | 74.41    | 73.41   |
| 210.63 | 208.80 | 208.40 |            | 73.65   | 75.18    | 74.49   |
| 211.96 | 211.02 | 209.97 |            | 74.85   | 75.95    | 74.75   |
| 212.44 | 211.67 | 211.27 |            | 76.05   | 77.20    | 75.88   |
| 213.25 | 212.64 | 212.38 |            | 78.88   | 84.27    | 86.07   |
| 214.50 | 213.55 | 212.42 |            | 85.19   | 86.48    | 88.19   |
| 216.55 | 214.67 | 213.84 |            | 88.34   | 88.56    | 88.39   |
| 218.00 | 215.71 | 214.34 |            | 88.48   | 89.41    | 88.66   |
| 218.35 | 216.63 | 215.29 |            | 89.52   | 90.04    | 90.64   |
| 218.99 | 218.35 | 217.57 |            | 90.00   | 90.71    | 92.02   |

---

|            |         |          |         |        |        |        |
|------------|---------|----------|---------|--------|--------|--------|
|            | 220.53  | 218.50   | 218.40  | 93.06  | 93.95  | 93.02  |
|            | 222.76  | 220.32   | 218.67  | 94.61  | 94.44  | 94.18  |
|            | 223.89  | 222.60   | 220.91  | 95.17  | 95.12  | 94.59  |
|            | 226.07  | 224.11   | 223.82  | 97.22  | 97.65  | 96.85  |
|            | 227.71  | 226.34   | 225.28  | 99.35  | 98.73  | 98.99  |
|            | 228.00  | 227.55   | 227.54  | 100.23 | 100.18 | 99.73  |
|            | 228.21  | 227.74   | 227.71  | 100.93 | 100.68 | 99.80  |
|            | 228.85  | 228.59   | 227.78  | 101.18 | 101.08 | 100.75 |
|            | 230.07  | 229.04   | 228.30  | 101.36 | 101.48 | 101.13 |
|            | 232.10  | 229.86   | 229.05  | 103.02 | 102.79 | 102.25 |
|            | 233.53  | 231.27   | 231.03  | 103.04 | 103.14 | 103.00 |
|            | 233.61  | 233.11   | 232.59  | 105.14 | 105.12 | 104.49 |
|            | 234.39  | 233.90   | 233.87  | 105.53 | 105.40 | 104.51 |
|            | 235.92  | 234.55   | 234.12  | 106.24 | 106.34 | 105.74 |
|            | 236.46  | 235.32   | 235.37  | 106.83 | 106.69 | 105.86 |
|            | 237.47  | 236.30   | 235.42  | 106.95 | 106.90 | 106.20 |
|            | 238.59  | 237.82   | 236.49  | 108.43 | 108.83 | 108.19 |
|            | 448.91  | 238.02   | 237.11  | 109.20 | 108.98 | 108.39 |
|            | 486.97  | 376.21   | 328.66  | 110.06 | 110.36 | 109.71 |
|            | 799.87  | 405.61   | 435.45  | 110.87 | 110.72 | 110.23 |
|            | 3586.67 | 3553.36  | 3507.83 | 113.69 | 113.39 | 111.93 |
| Ta/Cu(110) | 22.49   | -1931.92 | 22.61   | 116.40 | 116.65 | 116.54 |
|            | 28.96   | 33.19    | 31.77   | 116.93 | 117.42 | 117.70 |
|            | 31.00   | 33.28    | 32.16   | 118.47 | 118.98 | 118.68 |
|            | 31.00   | 49.12    | 33.21   | 122.05 | 121.43 | 120.83 |
|            | 32.77   | 50.57    | 47.79   | 124.80 | 125.46 | 124.90 |
|            | 48.45   | 56.62    | 49.58   | 126.16 | 125.96 | 125.59 |
|            | 51.45   | 61.01    | 53.70   | 126.46 | 126.24 | 125.94 |
|            | 55.02   | 62.00    | 60.43   | 127.13 | 126.86 | 126.41 |
|            | 60.15   | 64.37    | 61.26   | 127.83 | 127.49 | 126.90 |
|            | 61.87   | 66.83    | 63.48   | 128.14 | 127.58 | 126.92 |
|            | 64.39   | 67.48    | 65.91   | 128.48 | 128.75 | 129.02 |
|            | 67.10   | 69.55    | 66.48   | 131.62 | 130.78 | 129.68 |
|            | 68.34   | 70.13    | 68.46   | 131.83 | 131.82 | 131.75 |
|            | 68.87   | 70.87    | 69.54   | 132.65 | 133.95 | 131.95 |
|            | 71.05   | 73.84    | 70.40   | 133.78 | 133.99 | 133.08 |
|            | 73.59   | 74.95    | 73.40   | 134.87 | 135.04 | 134.24 |
|            | 73.96   | 81.19    | 73.75   | 135.32 | 135.11 | 134.63 |
|            | 74.24   | 81.34    | 75.45   | 136.15 | 136.30 | 136.14 |
|            | 80.10   | 82.16    | 81.19   | 136.85 | 137.28 | 136.97 |
|            | 82.15   | 84.34    | 82.92   | 136.97 | 137.66 | 137.45 |
|            | 83.28   | 86.78    | 84.45   | 138.83 | 138.88 | 138.49 |
|            | 87.58   | 91.31    | 88.64   | 139.29 | 139.09 | 138.57 |
|            | 89.67   | 92.11    | 91.23   | 140.69 | 140.76 | 139.17 |

---

|        |        |        |        |        |        |
|--------|--------|--------|--------|--------|--------|
| 91.38  | 92.33  | 92.13  | 140.86 | 140.91 | 140.26 |
| 92.89  | 96.51  | 92.68  | 141.00 | 141.02 | 140.71 |
| 96.02  | 96.93  | 94.78  | 142.80 | 143.47 | 143.42 |
| 96.32  | 98.16  | 97.00  | 146.12 | 146.00 | 144.03 |
| 98.50  | 100.15 | 97.78  | 146.32 | 146.35 | 146.31 |
| 100.20 | 101.28 | 98.04  | 146.99 | 147.04 | 146.90 |
| 100.99 | 102.39 | 99.90  | 149.70 | 150.65 | 150.24 |
| 101.29 | 104.36 | 102.02 | 150.65 | 150.97 | 150.65 |
| 104.24 | 104.38 | 103.49 | 151.55 | 152.07 | 152.39 |
| 106.45 | 107.03 | 104.92 | 155.45 | 155.39 | 154.65 |
| 106.90 | 107.63 | 106.17 | 156.39 | 155.51 | 155.38 |
| 107.96 | 107.77 | 107.09 | 157.05 | 157.77 | 157.34 |
| 108.17 | 107.89 | 107.15 | 161.29 | 160.96 | 160.13 |
| 109.93 | 111.17 | 108.59 | 166.84 | 167.16 | 164.83 |
| 111.09 | 111.70 | 111.06 | 167.98 | 167.90 | 166.54 |
| 112.01 | 112.29 | 111.98 | 169.46 | 169.87 | 167.40 |
| 112.22 | 113.10 | 112.17 | 169.56 | 169.98 | 169.15 |
| 113.49 | 113.51 | 112.46 | 171.35 | 171.75 | 169.71 |
| 113.82 | 114.26 | 113.10 | 173.20 | 173.62 | 171.19 |
| 114.08 | 115.45 | 113.42 | 173.26 | 174.06 | 173.41 |
| 115.84 | 116.44 | 115.53 | 173.95 | 174.52 | 174.16 |
| 116.43 | 116.88 | 115.90 | 174.37 | 174.73 | 174.39 |
| 117.17 | 117.26 | 115.92 | 175.13 | 175.54 | 174.82 |
| 117.30 | 117.41 | 116.66 | 176.18 | 175.73 | 175.15 |
| 119.87 | 119.18 | 117.32 | 176.31 | 176.57 | 175.56 |
| 120.01 | 120.42 | 120.37 | 177.67 | 177.43 | 176.11 |
| 122.32 | 122.68 | 121.50 | 177.82 | 178.48 | 176.33 |
| 131.10 | 131.81 | 130.32 | 178.25 | 178.54 | 178.14 |
| 134.81 | 134.40 | 134.26 | 178.84 | 179.82 | 178.43 |
| 135.38 | 135.18 | 134.29 | 181.39 | 182.06 | 179.67 |
| 135.41 | 135.94 | 134.53 | 181.86 | 182.17 | 181.15 |
| 135.90 | 136.14 | 135.62 | 181.98 | 182.39 | 181.49 |
| 136.42 | 136.47 | 135.72 | 183.80 | 182.66 | 181.69 |
| 136.48 | 136.54 | 135.79 | 186.08 | 186.04 | 182.79 |
| 136.54 | 136.61 | 136.32 | 188.56 | 189.22 | 185.66 |
| 137.54 | 138.20 | 137.18 | 191.10 | 190.78 | 188.64 |
| 137.89 | 138.30 | 138.01 | 193.67 | 192.63 | 189.37 |
| 139.70 | 138.60 | 138.14 | 198.08 | 200.26 | 191.55 |
| 143.68 | 143.46 | 141.30 | 203.95 | 204.52 | 199.86 |
| 143.91 | 144.39 | 141.76 | 204.86 | 205.75 | 203.35 |
| 144.89 | 144.70 | 143.38 | 205.83 | 205.86 | 204.88 |
| 145.10 | 144.99 | 143.90 | 206.44 | 206.12 | 205.03 |
| 146.80 | 146.71 | 146.24 | 206.56 | 206.70 | 205.77 |
| 146.82 | 146.89 | 146.74 | 207.82 | 208.06 | 206.70 |

---

---

|        |        |        |           |         |          |         |
|--------|--------|--------|-----------|---------|----------|---------|
| 148.56 | 148.25 | 147.35 |           | 208.05  | 208.37   | 207.52  |
| 150.39 | 150.69 | 149.97 |           | 208.75  | 208.53   | 207.83  |
| 150.46 | 150.81 | 150.36 |           | 211.33  | 211.54   | 208.38  |
| 150.67 | 150.84 | 150.67 |           | 211.76  | 211.77   | 210.32  |
| 150.96 | 151.16 | 150.98 |           | 212.58  | 212.40   | 210.92  |
| 151.60 | 151.48 | 151.00 |           | 213.01  | 213.36   | 212.13  |
| 151.67 | 152.83 | 151.71 |           | 214.58  | 214.02   | 212.63  |
| 153.70 | 154.36 | 152.83 |           | 214.61  | 215.50   | 213.94  |
| 153.81 | 154.37 | 153.28 |           | 215.66  | 215.89   | 214.71  |
| 155.16 | 154.48 | 153.95 |           | 218.82  | 218.46   | 215.65  |
| 156.50 | 156.15 | 154.56 |           | 219.50  | 218.91   | 217.54  |
| 157.51 | 156.57 | 155.62 |           | 220.55  | 220.19   | 218.28  |
| 158.61 | 157.17 | 156.30 |           | 223.66  | 222.88   | 218.51  |
| 162.54 | 163.01 | 156.57 |           | 223.78  | 223.86   | 222.11  |
| 165.79 | 165.75 | 161.89 |           | 226.53  | 226.81   | 223.80  |
| 168.49 | 168.41 | 165.02 |           | 228.30  | 228.15   | 225.73  |
| 168.95 | 168.54 | 166.81 |           | 228.38  | 228.59   | 227.88  |
| 175.58 | 175.10 | 167.86 |           | 228.71  | 228.64   | 228.02  |
| 175.82 | 175.49 | 174.63 |           | 229.03  | 229.33   | 228.06  |
| 175.84 | 175.75 | 174.82 |           | 229.93  | 229.92   | 228.32  |
| 177.00 | 176.81 | 174.96 |           | 232.96  | 232.72   | 229.16  |
| 179.77 | 179.05 | 175.92 |           | 233.60  | 233.15   | 232.20  |
| 180.70 | 180.29 | 179.04 |           | 233.74  | 234.31   | 233.23  |
| 180.92 | 180.73 | 179.13 |           | 234.65  | 234.96   | 234.14  |
| 182.80 | 183.93 | 180.69 |           | 236.17  | 236.12   | 234.29  |
| 184.08 | 184.34 | 183.45 |           | 236.43  | 236.66   | 236.07  |
| 184.35 | 185.01 | 184.14 |           | 236.84  | 237.98   | 236.19  |
| 184.73 | 185.08 | 184.75 |           | 238.21  | 238.79   | 238.05  |
| 187.10 | 187.24 | 185.16 |           | 471.13  | 278.24   | 238.48  |
| 187.28 | 187.54 | 185.79 |           | 525.88  | 403.47   | 338.54  |
| 187.72 | 187.90 | 186.36 |           | 757.64  | 449.56   | 490.79  |
| 188.76 | 187.94 | 186.57 |           | 3580.41 | 3573.08  | 3487.38 |
| 188.92 | 188.81 | 187.85 | W/Cu(110) | 21.68   | -1512.88 | 19.26   |
| 189.39 | 188.90 | 187.94 |           | 21.82   | 21.62    | 20.63   |
| 190.74 | 190.83 | 188.53 |           | 26.19   | 22.48    | 29.18   |
| 192.69 | 192.72 | 189.82 |           | 29.13   | 30.55    | 41.67   |
| 193.65 | 193.11 | 191.93 |           | 39.64   | 42.79    | 43.27   |
| 195.32 | 195.29 | 192.71 |           | 42.50   | 46.60    | 50.25   |
| 198.34 | 198.04 | 194.63 |           | 44.73   | 53.84    | 52.51   |
| 199.81 | 199.27 | 197.13 |           | 53.05   | 53.94    | 53.91   |
| 200.55 | 200.57 | 197.77 |           | 53.80   | 54.79    | 54.53   |
| 201.11 | 201.45 | 199.46 |           | 55.53   | 56.30    | 56.29   |
| 203.96 | 204.78 | 200.69 |           | 57.68   | 57.91    | 57.87   |
| 205.65 | 205.11 | 203.70 |           | 58.65   | 59.05    | 58.98   |

---

|           |         |          |         |        |        |        |
|-----------|---------|----------|---------|--------|--------|--------|
|           | 209.37  | 209.54   | 204.86  | 58.68  | 59.31  | 59.17  |
|           | 209.89  | 210.39   | 208.70  | 58.89  | 59.56  | 59.38  |
|           | 210.23  | 210.46   | 209.50  | 59.47  | 59.76  | 60.50  |
|           | 210.31  | 210.65   | 209.89  | 60.57  | 60.23  | 61.07  |
|           | 210.67  | 210.86   | 210.12  | 60.78  | 62.31  | 63.59  |
|           | 212.29  | 212.03   | 210.33  | 61.16  | 64.80  | 65.52  |
|           | 212.81  | 213.00   | 211.40  | 65.59  | 68.11  | 67.56  |
|           | 214.67  | 213.53   | 211.82  | 68.28  | 69.06  | 67.91  |
|           | 214.77  | 214.58   | 212.12  | 68.66  | 78.98  | 72.87  |
|           | 217.18  | 216.87   | 213.00  | 79.95  | 83.66  | 80.63  |
|           | 217.43  | 217.85   | 215.52  | 84.67  | 85.70  | 84.92  |
|           | 217.62  | 218.47   | 217.42  | 85.01  | 85.84  | 85.48  |
|           | 217.87  | 218.59   | 217.69  | 86.54  | 87.28  | 85.61  |
|           | 218.52  | 219.07   | 218.30  | 86.89  | 89.00  | 85.70  |
|           | 219.93  | 220.03   | 218.72  | 89.12  | 90.36  | 88.85  |
|           | 220.48  | 220.33   | 218.81  | 90.15  | 90.53  | 89.17  |
|           | 224.40  | 220.85   | 218.92  | 90.82  | 91.41  | 90.37  |
|           | 224.71  | 224.99   | 222.65  | 91.78  | 91.72  | 90.38  |
|           | 225.87  | 225.87   | 223.93  | 91.80  | 92.54  | 91.69  |
|           | 226.15  | 226.43   | 225.58  | 92.36  | 93.58  | 91.85  |
|           | 228.47  | 228.06   | 226.37  | 92.54  | 94.66  | 93.84  |
|           | 231.76  | 231.91   | 227.07  | 94.51  | 95.29  | 94.35  |
|           | 231.89  | 232.37   | 231.20  | 96.18  | 95.55  | 94.77  |
|           | 233.66  | 232.66   | 231.75  | 96.53  | 96.54  | 95.87  |
|           | 234.17  | 233.32   | 232.18  | 96.87  | 97.28  | 96.46  |
|           | 235.24  | 233.34   | 232.92  | 97.50  | 97.54  | 96.61  |
|           | 235.74  | 235.95   | 234.32  | 99.07  | 98.46  | 97.29  |
|           | 236.68  | 236.78   | 235.56  | 99.16  | 99.38  | 97.86  |
|           | 238.01  | 238.12   | 236.45  | 99.37  | 99.50  | 98.87  |
|           | 239.15  | 238.89   | 237.29  | 100.36 | 100.16 | 99.12  |
|           | 240.80  | 240.37   | 237.74  | 100.58 | 100.59 | 100.13 |
|           | 243.04  | 243.33   | 239.24  | 101.58 | 101.53 | 100.93 |
|           | 428.05  | 246.77   | 243.10  | 101.86 | 102.13 | 101.22 |
|           | 498.16  | 391.19   | 335.44  | 103.35 | 102.62 | 101.60 |
|           | 909.71  | 447.58   | 529.12  | 104.76 | 103.94 | 103.15 |
|           | 3589.71 | 3571.14  | 3493.34 | 104.92 | 104.08 | 103.44 |
| V/Cu(211) | 25.90   | -1886.42 | 26.69   | 105.11 | 108.13 | 103.70 |
|           | 37.76   | 27.62    | 42.66   | 108.19 | 108.23 | 107.27 |
|           | 42.53   | 37.54    | 42.91   | 108.89 | 108.30 | 107.61 |
|           | 42.80   | 42.55    | 44.27   | 113.16 | 112.57 | 112.34 |
|           | 44.34   | 42.75    | 49.13   | 115.83 | 115.54 | 114.33 |
|           | 55.92   | 44.39    | 56.15   | 115.97 | 116.06 | 115.87 |
|           | 56.65   | 55.60    | 56.43   | 118.76 | 118.65 | 118.40 |
|           | 59.03   | 56.66    | 59.01   | 118.79 | 119.68 | 119.38 |

---

|        |        |        |        |        |        |
|--------|--------|--------|--------|--------|--------|
| 60.19  | 59.12  | 61.38  | 121.26 | 121.17 | 120.40 |
| 62.25  | 60.05  | 61.95  | 121.58 | 121.79 | 120.77 |
| 68.31  | 62.11  | 68.70  | 122.00 | 122.30 | 121.83 |
| 70.10  | 68.78  | 69.45  | 122.19 | 122.51 | 121.91 |
| 70.14  | 69.97  | 69.91  | 122.66 | 122.65 | 122.69 |
| 70.43  | 70.04  | 70.07  | 125.71 | 123.72 | 124.49 |
| 70.95  | 70.37  | 70.62  | 127.39 | 127.55 | 126.25 |
| 71.38  | 70.74  | 71.84  | 127.81 | 128.04 | 127.30 |
| 72.21  | 71.96  | 71.93  | 128.68 | 129.43 | 127.62 |
| 76.85  | 72.18  | 73.28  | 129.38 | 129.48 | 128.47 |
| 77.20  | 76.71  | 77.07  | 129.84 | 129.57 | 128.70 |
| 77.65  | 77.26  | 77.15  | 130.04 | 129.88 | 128.93 |
| 78.66  | 77.93  | 78.89  | 132.26 | 131.90 | 131.10 |
| 83.98  | 78.97  | 79.02  | 132.86 | 132.79 | 131.32 |
| 85.36  | 83.81  | 84.40  | 133.12 | 132.87 | 132.05 |
| 86.62  | 84.98  | 84.45  | 133.95 | 133.21 | 132.25 |
| 87.96  | 85.91  | 87.35  | 134.99 | 134.76 | 133.03 |
| 88.00  | 86.81  | 88.17  | 135.20 | 135.91 | 133.80 |
| 88.52  | 87.88  | 88.66  | 137.02 | 136.83 | 135.82 |
| 89.02  | 88.33  | 88.75  | 137.09 | 137.05 | 135.94 |
| 89.17  | 88.95  | 89.78  | 137.53 | 137.22 | 136.19 |
| 93.95  | 89.49  | 91.69  | 137.64 | 138.70 | 138.28 |
| 95.19  | 93.88  | 95.20  | 141.85 | 138.95 | 138.94 |
| 95.89  | 95.33  | 95.88  | 142.06 | 142.21 | 140.90 |
| 99.81  | 95.98  | 96.02  | 142.32 | 142.34 | 141.06 |
| 100.19 | 99.08  | 99.71  | 143.32 | 143.00 | 142.13 |
| 100.35 | 99.61  | 99.95  | 145.29 | 144.91 | 143.33 |
| 101.44 | 100.31 | 100.33 | 149.15 | 148.98 | 143.73 |
| 102.09 | 101.46 | 101.00 | 150.89 | 150.95 | 148.22 |
| 102.40 | 101.94 | 101.61 | 155.08 | 154.91 | 150.48 |
| 103.56 | 102.37 | 102.00 | 155.73 | 155.74 | 154.22 |
| 103.75 | 103.28 | 103.19 | 156.16 | 156.45 | 155.14 |
| 104.83 | 103.37 | 103.42 | 156.43 | 156.58 | 155.40 |
| 105.56 | 104.77 | 104.35 | 164.08 | 163.78 | 156.51 |
| 105.72 | 105.51 | 105.24 | 164.32 | 164.24 | 164.17 |
| 105.81 | 105.53 | 105.74 | 165.02 | 165.00 | 164.18 |
| 106.80 | 105.74 | 106.26 | 166.07 | 165.55 | 164.82 |
| 107.40 | 106.77 | 106.98 | 166.59 | 166.41 | 165.23 |
| 107.58 | 107.60 | 107.72 | 167.50 | 167.40 | 166.18 |
| 108.72 | 107.83 | 107.76 | 168.13 | 168.13 | 166.76 |
| 109.03 | 108.51 | 109.03 | 170.10 | 170.21 | 167.47 |
| 109.07 | 109.19 | 109.72 | 171.60 | 170.62 | 169.21 |
| 110.24 | 109.30 | 110.43 | 171.66 | 171.44 | 170.12 |
| 111.47 | 110.42 | 111.04 | 171.85 | 171.74 | 170.35 |

---



---

|        |        |        |        |        |        |
|--------|--------|--------|--------|--------|--------|
| 117.78 | 117.52 | 117.76 | 171.94 | 172.00 | 171.04 |
| 117.88 | 118.22 | 118.50 | 176.52 | 176.15 | 171.39 |
| 119.76 | 120.20 | 120.71 | 178.02 | 176.91 | 175.93 |
| 119.96 | 120.23 | 120.74 | 179.81 | 179.65 | 177.08 |
| 122.06 | 121.81 | 122.40 | 182.15 | 181.49 | 178.74 |
| 122.34 | 122.51 | 122.99 | 182.34 | 182.05 | 180.30 |
| 123.11 | 123.09 | 123.55 | 187.25 | 186.82 | 181.34 |
| 123.25 | 123.53 | 124.34 | 187.29 | 187.42 | 185.64 |
| 123.73 | 123.90 | 124.71 | 193.03 | 193.14 | 186.20 |
| 124.69 | 124.17 | 124.88 | 196.03 | 196.06 | 192.08 |
| 125.50 | 125.70 | 125.80 | 196.86 | 196.87 | 195.52 |
| 125.85 | 125.91 | 125.91 | 196.87 | 196.92 | 195.93 |
| 127.89 | 127.74 | 127.27 | 197.78 | 198.01 | 196.83 |
| 128.82 | 129.21 | 128.96 | 199.26 | 199.11 | 197.37 |
| 129.40 | 129.30 | 129.07 | 200.04 | 199.70 | 197.93 |
| 129.78 | 129.49 | 129.36 | 201.11 | 201.15 | 199.58 |
| 130.20 | 129.77 | 130.15 | 201.29 | 201.51 | 200.15 |
| 131.26 | 131.23 | 131.24 | 202.70 | 203.17 | 200.59 |
| 132.39 | 131.90 | 132.18 | 202.70 | 203.62 | 201.60 |
| 134.18 | 134.12 | 133.72 | 204.58 | 204.11 | 203.59 |
| 134.24 | 134.29 | 134.26 | 205.44 | 205.41 | 204.07 |
| 134.58 | 134.42 | 134.36 | 206.19 | 205.63 | 204.28 |
| 134.71 | 134.58 | 134.47 | 211.34 | 210.97 | 204.35 |
| 134.79 | 134.69 | 134.81 | 212.62 | 212.79 | 209.80 |
| 135.08 | 134.88 | 135.93 | 212.91 | 213.42 | 211.99 |
| 136.02 | 135.80 | 137.18 | 213.36 | 213.44 | 212.31 |
| 138.00 | 137.81 | 138.77 | 213.94 | 214.16 | 213.23 |
| 139.72 | 139.56 | 138.97 | 216.33 | 214.39 | 213.42 |
| 139.92 | 140.06 | 140.06 | 217.84 | 216.24 | 215.59 |
| 140.33 | 140.35 | 140.10 | 218.95 | 217.28 | 216.47 |
| 140.43 | 140.40 | 140.44 | 219.44 | 218.92 | 218.27 |
| 140.94 | 140.99 | 140.59 | 219.94 | 219.30 | 218.40 |
| 141.35 | 141.22 | 141.11 | 220.13 | 220.19 | 218.42 |
| 143.22 | 143.05 | 143.50 | 221.00 | 220.32 | 219.16 |
| 143.93 | 144.08 | 143.77 | 221.31 | 221.21 | 220.13 |
| 144.03 | 144.19 | 144.00 | 221.51 | 221.96 | 220.69 |
| 144.41 | 144.52 | 144.53 | 222.34 | 222.11 | 221.03 |
| 144.53 | 144.79 | 144.70 | 223.04 | 223.26 | 221.78 |
| 145.95 | 145.89 | 146.02 | 224.98 | 225.76 | 222.58 |
| 147.13 | 147.27 | 147.01 | 226.68 | 225.93 | 224.87 |
| 149.00 | 148.86 | 148.72 | 226.69 | 226.50 | 225.58 |
| 149.21 | 149.18 | 149.31 | 229.74 | 230.06 | 226.23 |
| 149.68 | 150.20 | 149.83 | 233.60 | 234.02 | 228.91 |
| 152.00 | 152.21 | 152.03 | 414.80 | 244.78 | 233.59 |

---

---

|        |        |        |            |         |          |         |
|--------|--------|--------|------------|---------|----------|---------|
| 152.05 | 152.38 | 152.31 |            | 505.15  | 395.79   | 361.51  |
| 153.25 | 153.03 | 152.56 |            | 913.77  | 526.99   | 536.61  |
| 153.54 | 153.54 | 153.07 |            | 3605.67 | 3571.59  | 3508.01 |
| 154.11 | 153.66 | 153.87 | Zr/Cu(211) | 23.63   | -1737.38 | 22.47   |
| 156.46 | 156.31 | 156.39 |            | 44.51   | 24.17    | 23.21   |
| 157.40 | 157.34 | 157.26 |            | 44.59   | 25.95    | 36.42   |
| 158.52 | 158.61 | 157.66 |            | 48.96   | 44.15    | 43.46   |
| 159.14 | 159.00 | 157.92 |            | 49.48   | 44.30    | 43.83   |
| 159.31 | 159.09 | 158.82 |            | 50.28   | 49.32    | 49.21   |
| 159.37 | 159.40 | 159.40 |            | 51.03   | 50.57    | 50.27   |
| 159.58 | 159.61 | 159.46 |            | 58.51   | 51.04    | 50.90   |
| 160.56 | 161.66 | 160.93 |            | 58.74   | 58.50    | 57.46   |
| 161.70 | 161.92 | 161.59 |            | 60.11   | 59.11    | 59.51   |
| 162.15 | 161.93 | 162.12 |            | 66.57   | 60.68    | 61.15   |
| 162.75 | 162.83 | 162.50 |            | 68.89   | 67.64    | 66.56   |
| 162.95 | 163.47 | 162.82 |            | 70.50   | 68.83    | 68.82   |
| 163.88 | 163.54 | 163.10 |            | 71.77   | 71.06    | 69.54   |
| 164.06 | 164.36 | 163.46 |            | 71.91   | 71.73    | 70.00   |
| 164.38 | 164.54 | 164.50 |            | 73.07   | 71.91    | 72.02   |
| 165.20 | 165.29 | 164.60 |            | 76.02   | 73.37    | 72.43   |
| 166.83 | 166.89 | 165.58 |            | 77.19   | 75.61    | 73.97   |
| 167.49 | 167.05 | 166.45 |            | 78.06   | 77.56    | 77.41   |
| 168.03 | 167.88 | 167.47 |            | 78.76   | 78.56    | 79.05   |
| 168.34 | 168.12 | 167.69 |            | 79.52   | 79.44    | 79.94   |
| 171.44 | 171.32 | 168.95 |            | 82.32   | 79.84    | 80.01   |
| 171.69 | 171.59 | 170.71 |            | 84.49   | 81.88    | 80.75   |
| 171.87 | 171.77 | 171.37 |            | 84.72   | 84.97    | 84.66   |
| 172.21 | 172.45 | 171.97 |            | 85.82   | 85.12    | 85.48   |
| 172.98 | 173.09 | 172.60 |            | 86.67   | 85.76    | 85.64   |
| 173.51 | 173.25 | 172.73 |            | 87.78   | 88.04    | 87.51   |
| 173.61 | 173.43 | 172.95 |            | 88.12   | 88.67    | 88.84   |
| 173.77 | 173.83 | 173.00 |            | 88.78   | 88.94    | 89.61   |
| 175.08 | 174.27 | 173.65 |            | 91.25   | 91.67    | 91.68   |
| 175.66 | 174.94 | 173.99 |            | 91.84   | 92.07    | 92.22   |
| 179.86 | 179.58 | 175.06 |            | 92.32   | 94.00    | 93.75   |
| 184.00 | 183.99 | 180.16 |            | 92.66   | 94.65    | 95.92   |
| 184.65 | 184.16 | 184.39 |            | 96.52   | 96.48    | 96.32   |
| 186.54 | 186.24 | 184.70 |            | 97.23   | 97.65    | 97.30   |
| 186.76 | 186.54 | 185.76 |            | 97.52   | 97.67    | 97.55   |
| 188.49 | 187.33 | 186.03 |            | 98.11   | 98.25    | 98.55   |
| 188.94 | 188.53 | 186.47 |            | 100.05  | 99.69    | 98.81   |
| 189.38 | 188.75 | 188.32 |            | 100.70  | 100.75   | 99.25   |
| 189.62 | 189.82 | 188.41 |            | 101.26  | 101.24   | 100.27  |
| 190.10 | 189.92 | 189.11 |            | 101.40  | 101.50   | 100.79  |

---

---

|        |        |        |        |        |        |
|--------|--------|--------|--------|--------|--------|
| 190.70 | 190.21 | 189.80 | 101.79 | 102.45 | 101.00 |
| 192.48 | 192.10 | 189.83 | 103.04 | 103.11 | 102.60 |
| 193.55 | 193.49 | 191.78 | 103.39 | 103.64 | 102.77 |
| 194.66 | 194.31 | 193.35 | 104.85 | 104.73 | 103.65 |
| 196.28 | 195.75 | 193.87 | 105.05 | 105.66 | 104.33 |
| 196.83 | 196.26 | 195.55 | 107.37 | 106.99 | 105.96 |
| 196.87 | 196.50 | 195.58 | 108.68 | 108.66 | 107.00 |
| 197.80 | 197.21 | 196.09 | 109.25 | 109.39 | 108.07 |
| 198.19 | 197.75 | 196.89 | 109.79 | 109.53 | 109.29 |
| 199.63 | 199.55 | 197.67 | 110.93 | 111.60 | 109.50 |
| 200.94 | 200.84 | 199.16 | 115.21 | 115.46 | 111.78 |
| 201.28 | 200.95 | 200.48 | 115.63 | 116.14 | 115.04 |
| 202.94 | 202.92 | 200.57 | 116.36 | 117.34 | 115.56 |
| 203.58 | 203.09 | 201.94 | 117.42 | 117.36 | 116.97 |
| 204.96 | 204.15 | 202.67 | 118.12 | 118.34 | 117.23 |
| 205.31 | 204.49 | 204.12 | 118.13 | 118.42 | 118.16 |
| 205.63 | 205.19 | 204.21 | 120.37 | 121.01 | 118.27 |
| 206.96 | 206.32 | 204.73 | 121.04 | 121.52 | 120.71 |
| 209.99 | 209.82 | 206.17 | 121.40 | 121.69 | 120.76 |
| 211.18 | 210.86 | 209.81 | 123.08 | 123.04 | 121.22 |
| 212.55 | 211.11 | 210.89 | 123.14 | 123.30 | 122.38 |
| 212.86 | 212.30 | 211.31 | 123.73 | 124.19 | 123.02 |
| 213.77 | 212.82 | 211.66 | 125.78 | 125.75 | 124.09 |
| 215.73 | 215.53 | 212.82 | 127.55 | 128.04 | 125.14 |
| 216.18 | 215.89 | 215.52 | 128.63 | 129.03 | 127.89 |
| 217.09 | 216.27 | 216.10 | 128.71 | 129.10 | 127.95 |
| 220.16 | 218.09 | 216.29 | 129.39 | 129.28 | 128.96 |
| 221.33 | 220.17 | 219.95 | 130.22 | 130.37 | 129.35 |
| 221.92 | 221.27 | 221.03 | 130.23 | 130.68 | 129.92 |
| 225.54 | 221.77 | 221.54 | 130.97 | 130.90 | 130.25 |
| 226.41 | 225.34 | 225.23 | 131.37 | 131.59 | 130.29 |
| 240.32 | 226.32 | 226.04 | 132.56 | 132.87 | 131.11 |
| 242.48 | 240.73 | 241.13 | 132.72 | 133.15 | 132.38 |
| 244.78 | 241.45 | 241.84 | 134.00 | 133.76 | 132.76 |
| 246.09 | 244.78 | 245.24 | 134.49 | 134.45 | 133.66 |
| 247.75 | 245.56 | 245.33 | 134.53 | 134.98 | 134.31 |
| 247.89 | 247.86 | 247.17 | 134.98 | 135.10 | 134.79 |
| 248.91 | 247.98 | 247.85 | 135.35 | 135.36 | 135.02 |
| 252.05 | 248.89 | 249.30 | 136.35 | 136.30 | 135.68 |
| 253.14 | 251.80 | 251.20 | 136.68 | 137.45 | 136.09 |
| 255.52 | 253.11 | 252.60 | 137.85 | 138.62 | 137.26 |
| 256.30 | 255.33 | 254.54 | 140.01 | 140.05 | 139.00 |
| 258.10 | 256.09 | 255.45 | 140.04 | 140.49 | 139.45 |
| 258.48 | 258.13 | 256.89 | 141.42 | 141.30 | 140.10 |

---

---

|            |         |          |         |        |        |        |
|------------|---------|----------|---------|--------|--------|--------|
|            | 259.36  | 258.73   | 257.47  | 141.82 | 141.69 | 140.78 |
|            | 260.92  | 259.20   | 258.27  | 141.83 | 142.01 | 141.34 |
|            | 261.33  | 260.57   | 259.92  | 142.09 | 142.01 | 141.44 |
|            | 264.30  | 261.21   | 260.31  | 143.34 | 143.70 | 141.84 |
|            | 266.51  | 264.25   | 262.83  | 144.15 | 143.87 | 142.58 |
|            | 267.88  | 266.47   | 265.32  | 144.19 | 144.88 | 142.72 |
|            | 269.42  | 267.81   | 266.93  | 145.79 | 145.85 | 145.24 |
|            | 521.08  | 269.43   | 268.69  | 146.25 | 146.77 | 145.63 |
|            | 532.55  | 412.27   | 370.14  | 146.76 | 147.03 | 146.45 |
|            | 959.93  | 423.86   | 493.96  | 147.80 | 148.10 | 146.74 |
|            | 3558.02 | 3567.68  | 3540.18 | 148.75 | 148.38 | 147.42 |
| Nb/Cu(211) | 26.66   | -1468.84 | 25.44   | 148.88 | 149.30 | 148.34 |
|            | 37.93   | 27.07    | 41.87   | 150.40 | 150.51 | 149.01 |
|            | 41.83   | 41.27    | 42.38   | 150.94 | 151.27 | 150.52 |
|            | 42.25   | 41.99    | 44.21   | 151.86 | 152.25 | 150.72 |
|            | 44.64   | 42.19    | 54.46   | 153.15 | 152.50 | 151.95 |
|            | 54.43   | 44.74    | 56.00   | 153.33 | 153.39 | 152.21 |
|            | 56.75   | 54.01    | 56.73   | 154.19 | 154.20 | 153.40 |
|            | 58.74   | 56.72    | 59.53   | 154.76 | 154.94 | 153.50 |
|            | 59.78   | 58.68    | 60.11   | 155.36 | 155.18 | 154.21 |
|            | 62.29   | 59.41    | 63.13   | 155.92 | 156.33 | 154.28 |
|            | 68.27   | 62.07    | 67.25   | 156.84 | 156.68 | 155.22 |
|            | 69.66   | 68.41    | 69.63   | 157.49 | 157.17 | 155.41 |
|            | 70.10   | 69.56    | 69.73   | 158.07 | 158.20 | 156.51 |
|            | 70.12   | 69.61    | 69.98   | 158.74 | 158.83 | 157.70 |
|            | 70.29   | 70.04    | 70.32   | 159.29 | 158.87 | 158.19 |
|            | 71.30   | 70.56    | 71.68   | 159.40 | 161.17 | 158.40 |
|            | 72.01   | 71.05    | 71.95   | 162.25 | 162.70 | 161.13 |
|            | 77.08   | 71.74    | 73.32   | 163.45 | 163.06 | 162.58 |
|            | 77.42   | 76.47    | 76.66   | 163.53 | 163.77 | 162.62 |
|            | 78.03   | 77.28    | 77.23   | 164.43 | 164.19 | 163.42 |
|            | 78.46   | 78.07    | 77.77   | 166.05 | 166.03 | 163.68 |
|            | 82.60   | 78.36    | 79.09   | 166.12 | 166.40 | 165.44 |
|            | 83.01   | 82.45    | 83.73   | 166.41 | 166.52 | 166.20 |
|            | 85.04   | 84.74    | 84.25   | 167.47 | 168.60 | 166.53 |
|            | 85.20   | 84.80    | 85.54   | 170.74 | 170.95 | 167.99 |
|            | 86.49   | 86.02    | 86.80   | 172.09 | 171.43 | 169.90 |
|            | 87.99   | 87.79    | 87.67   | 172.92 | 173.21 | 171.04 |
|            | 88.34   | 88.66    | 88.49   | 174.74 | 175.12 | 173.00 |
|            | 88.79   | 88.81    | 89.19   | 174.85 | 175.47 | 174.31 |
|            | 89.47   | 89.56    | 89.74   | 175.41 | 175.60 | 175.25 |
|            | 93.47   | 93.76    | 95.21   | 176.83 | 177.53 | 175.56 |
|            | 95.43   | 95.77    | 95.67   | 177.31 | 177.92 | 177.50 |
|            | 96.01   | 96.18    | 95.90   | 178.87 | 179.52 | 177.72 |

---

---

|        |        |        |        |        |        |
|--------|--------|--------|--------|--------|--------|
| 98.17  | 96.78  | 97.49  | 180.12 | 180.84 | 179.56 |
| 99.94  | 99.83  | 99.63  | 180.84 | 180.95 | 179.91 |
| 100.02 | 100.08 | 99.88  | 181.92 | 182.57 | 181.22 |
| 101.38 | 101.07 | 100.86 | 183.61 | 183.70 | 182.48 |
| 101.78 | 101.65 | 101.15 | 183.81 | 184.07 | 183.17 |
| 102.29 | 102.28 | 101.84 | 187.17 | 187.40 | 183.71 |
| 102.91 | 102.70 | 102.30 | 187.89 | 187.75 | 186.82 |
| 103.89 | 103.44 | 103.31 | 187.94 | 187.88 | 187.65 |
| 103.94 | 103.80 | 103.75 | 189.34 | 189.58 | 187.68 |
| 105.39 | 105.07 | 104.82 | 190.08 | 190.58 | 189.48 |
| 105.80 | 105.60 | 105.12 | 192.55 | 192.44 | 190.39 |
| 106.45 | 105.74 | 106.00 | 193.87 | 193.83 | 192.18 |
| 107.53 | 107.27 | 107.15 | 197.24 | 197.24 | 193.47 |
| 107.86 | 107.64 | 107.60 | 198.78 | 199.03 | 197.16 |
| 107.89 | 107.96 | 107.62 | 198.85 | 199.06 | 198.47 |
| 108.68 | 108.08 | 108.45 | 199.65 | 199.70 | 198.57 |
| 108.88 | 108.83 | 108.87 | 200.39 | 200.40 | 199.14 |
| 109.10 | 109.34 | 109.94 | 201.13 | 201.51 | 199.70 |
| 110.69 | 110.81 | 110.83 | 201.76 | 202.02 | 201.24 |
| 117.89 | 117.98 | 118.21 | 201.94 | 202.03 | 201.54 |
| 118.35 | 118.05 | 118.40 | 203.05 | 202.98 | 202.03 |
| 119.26 | 119.36 | 120.51 | 203.58 | 203.40 | 202.55 |
| 120.56 | 120.49 | 120.70 | 204.75 | 204.62 | 202.75 |
| 121.33 | 121.29 | 121.50 | 208.32 | 208.12 | 203.75 |
| 122.06 | 121.38 | 122.38 | 208.50 | 208.66 | 206.82 |
| 122.89 | 122.75 | 122.41 | 209.63 | 209.61 | 208.24 |
| 123.30 | 123.14 | 123.19 | 210.46 | 210.88 | 208.68 |
| 124.02 | 124.28 | 123.80 | 212.94 | 212.61 | 210.71 |
| 124.87 | 124.85 | 124.85 | 213.03 | 213.08 | 211.91 |
| 126.41 | 125.79 | 125.50 | 214.73 | 213.89 | 212.06 |
| 126.81 | 126.44 | 126.32 | 215.25 | 215.33 | 213.07 |
| 128.01 | 127.76 | 126.45 | 215.99 | 216.08 | 214.97 |
| 128.14 | 128.45 | 127.11 | 216.42 | 216.32 | 215.58 |
| 129.51 | 129.42 | 128.58 | 220.11 | 220.16 | 215.66 |
| 129.70 | 129.48 | 128.90 | 220.67 | 220.68 | 219.87 |
| 130.30 | 129.75 | 129.54 | 221.22 | 221.22 | 220.41 |
| 131.16 | 130.97 | 130.04 | 224.44 | 224.75 | 220.70 |
| 132.81 | 132.45 | 131.15 | 227.78 | 228.14 | 224.44 |
| 133.43 | 132.63 | 132.51 | 228.81 | 229.26 | 227.76 |
| 134.03 | 133.88 | 132.71 | 228.95 | 229.87 | 228.95 |
| 134.13 | 134.00 | 133.58 | 229.87 | 230.03 | 229.50 |
| 134.66 | 134.56 | 134.24 | 234.33 | 235.83 | 229.85 |
| 134.92 | 134.76 | 134.38 | 235.91 | 236.07 | 234.87 |
| 135.36 | 134.76 | 134.51 | 237.13 | 236.83 | 235.72 |

---

---

|        |        |        |            |         |          |         |
|--------|--------|--------|------------|---------|----------|---------|
| 136.35 | 135.43 | 135.02 |            | 239.60  | 239.46   | 236.90  |
| 138.34 | 138.44 | 135.94 |            | 239.98  | 239.58   | 238.16  |
| 139.88 | 139.82 | 138.60 |            | 241.29  | 240.85   | 238.20  |
| 140.21 | 139.88 | 139.13 |            | 241.37  | 241.13   | 239.72  |
| 140.31 | 140.20 | 139.81 |            | 243.33  | 243.10   | 240.19  |
| 140.53 | 140.55 | 140.29 |            | 243.77  | 243.20   | 242.10  |
| 140.92 | 140.93 | 140.52 |            | 244.11  | 243.97   | 242.21  |
| 141.49 | 141.04 | 140.85 |            | 245.03  | 244.82   | 242.96  |
| 143.41 | 143.28 | 140.94 |            | 245.91  | 245.07   | 243.72  |
| 144.15 | 143.83 | 143.46 |            | 245.93  | 245.73   | 244.58  |
| 144.21 | 144.09 | 143.86 |            | 247.08  | 246.62   | 244.90  |
| 144.41 | 144.50 | 143.93 |            | 248.08  | 248.01   | 245.66  |
| 146.89 | 145.46 | 144.91 |            | 248.45  | 248.50   | 247.40  |
| 146.99 | 146.74 | 146.43 |            | 249.18  | 248.72   | 247.96  |
| 147.34 | 147.18 | 146.60 |            | 250.32  | 250.29   | 248.31  |
| 149.46 | 149.41 | 146.62 |            | 252.43  | 251.14   | 249.63  |
| 149.65 | 149.80 | 149.08 |            | 255.21  | 252.43   | 251.27  |
| 150.71 | 150.42 | 149.66 |            | 256.82  | 255.25   | 252.41  |
| 151.92 | 151.80 | 149.89 |            | 485.19  | 257.19   | 254.57  |
| 152.14 | 152.30 | 151.86 |            | 565.38  | 357.74   | 323.35  |
| 154.49 | 153.45 | 152.38 |            | 797.32  | 431.39   | 517.46  |
| 154.53 | 154.17 | 152.96 |            | 3534.58 | 3570.35  | 3513.91 |
| 155.91 | 155.47 | 154.10 | Hf/Cu(211) | 20.99   | -1674.29 | 23.91   |
| 156.97 | 156.71 | 155.06 |            | 40.37   | 22.98    | 42.67   |
| 157.39 | 156.87 | 156.31 |            | 43.70   | 42.32    | 42.89   |
| 158.18 | 157.98 | 157.15 |            | 45.88   | 43.58    | 44.61   |
| 159.28 | 159.19 | 157.19 |            | 48.14   | 47.49    | 47.66   |
| 159.58 | 159.27 | 158.64 |            | 49.70   | 48.94    | 49.12   |
| 160.18 | 160.07 | 159.07 |            | 52.83   | 50.89    | 49.29   |
| 160.32 | 160.51 | 160.14 |            | 59.19   | 57.17    | 52.86   |
| 161.79 | 161.85 | 160.78 |            | 60.12   | 59.81    | 59.17   |
| 162.50 | 162.06 | 161.55 |            | 61.75   | 60.73    | 59.47   |
| 162.72 | 162.56 | 162.45 |            | 65.70   | 64.57    | 62.15   |
| 163.63 | 163.17 | 162.49 |            | 68.53   | 67.82    | 66.74   |
| 163.80 | 163.63 | 163.09 |            | 70.16   | 69.00    | 68.86   |
| 164.35 | 164.26 | 163.45 |            | 70.74   | 70.20    | 69.61   |
| 164.56 | 164.60 | 163.73 |            | 71.61   | 71.36    | 70.74   |
| 165.75 | 165.11 | 164.43 |            | 74.34   | 71.79    | 71.25   |
| 166.10 | 166.10 | 165.18 |            | 75.51   | 74.29    | 71.99   |
| 167.29 | 167.15 | 165.77 |            | 77.39   | 76.22    | 74.40   |
| 168.11 | 167.76 | 166.68 |            | 78.62   | 78.13    | 76.55   |
| 168.54 | 167.99 | 167.42 |            | 79.17   | 79.42    | 78.61   |
| 170.25 | 170.07 | 167.65 |            | 80.83   | 79.55    | 79.81   |
| 171.39 | 170.95 | 170.08 |            | 82.85   | 81.29    | 80.19   |

---

---

|        |        |        |        |        |        |
|--------|--------|--------|--------|--------|--------|
| 171.76 | 171.42 | 170.59 | 84.90  | 83.89  | 81.12  |
| 173.02 | 172.48 | 170.73 | 85.64  | 85.20  | 84.47  |
| 173.16 | 172.55 | 172.15 | 86.74  | 85.98  | 84.96  |
| 173.35 | 173.01 | 172.51 | 87.82  | 87.95  | 86.05  |
| 173.61 | 173.13 | 172.76 | 88.39  | 88.19  | 87.79  |
| 174.19 | 174.18 | 172.81 | 88.76  | 89.07  | 89.06  |
| 175.38 | 174.30 | 173.99 | 89.63  | 89.57  | 89.43  |
| 175.39 | 174.86 | 174.64 | 90.32  | 90.63  | 90.59  |
| 176.08 | 176.04 | 174.97 | 91.89  | 92.32  | 92.41  |
| 180.62 | 180.14 | 175.58 | 92.52  | 94.42  | 92.54  |
| 185.43 | 182.64 | 180.30 | 96.20  | 96.31  | 95.89  |
| 186.27 | 185.54 | 185.08 | 97.25  | 97.35  | 96.33  |
| 186.30 | 185.79 | 185.35 | 97.62  | 98.10  | 97.36  |
| 187.93 | 185.86 | 185.52 | 97.89  | 98.42  | 98.42  |
| 188.54 | 187.30 | 186.60 | 99.87  | 99.77  | 99.24  |
| 188.97 | 188.28 | 187.41 | 99.93  | 100.03 | 99.45  |
| 189.37 | 188.93 | 187.95 | 100.37 | 100.85 | 100.11 |
| 190.23 | 189.13 | 188.80 | 100.78 | 101.06 | 100.99 |
| 191.29 | 189.85 | 189.64 | 101.71 | 102.47 | 101.42 |
| 192.17 | 191.49 | 190.21 | 102.75 | 102.70 | 102.87 |
| 193.60 | 191.88 | 190.52 | 103.01 | 103.46 | 103.36 |
| 194.10 | 193.17 | 192.93 | 104.31 | 103.92 | 103.62 |
| 195.49 | 194.45 | 193.23 | 104.63 | 104.49 | 104.18 |
| 196.39 | 194.80 | 194.36 | 105.30 | 106.38 | 106.02 |
| 197.08 | 195.80 | 195.71 | 107.32 | 107.65 | 107.91 |
| 197.55 | 196.74 | 196.07 | 108.76 | 108.75 | 107.97 |
| 197.70 | 196.80 | 196.22 | 109.41 | 109.30 | 109.54 |
| 199.24 | 197.74 | 197.04 | 109.75 | 109.62 | 109.82 |
| 200.37 | 198.45 | 198.18 | 110.94 | 111.28 | 111.31 |
| 201.19 | 199.89 | 199.77 | 114.61 | 115.61 | 115.14 |
| 201.96 | 201.13 | 200.53 | 115.32 | 115.83 | 115.45 |
| 204.10 | 201.48 | 201.05 | 115.77 | 116.26 | 116.29 |
| 204.79 | 203.00 | 202.29 | 117.58 | 117.69 | 117.44 |
| 205.09 | 203.75 | 203.96 | 117.85 | 118.10 | 117.81 |
| 205.78 | 204.90 | 203.97 | 117.93 | 118.17 | 118.01 |
| 207.25 | 205.74 | 204.86 | 119.68 | 120.10 | 119.88 |
| 208.02 | 206.14 | 205.55 | 120.45 | 120.68 | 120.51 |
| 210.09 | 207.36 | 206.71 | 120.63 | 121.18 | 120.79 |
| 212.08 | 209.88 | 209.79 | 122.82 | 122.71 | 122.58 |
| 212.96 | 210.71 | 211.13 | 122.89 | 123.17 | 123.09 |
| 214.09 | 211.80 | 211.55 | 123.69 | 123.64 | 123.62 |
| 215.92 | 213.37 | 211.73 | 125.92 | 125.96 | 125.40 |
| 215.98 | 214.89 | 215.18 | 127.15 | 127.68 | 127.77 |
| 216.06 | 215.86 | 215.54 | 128.41 | 128.92 | 128.42 |

---

|            |         |          |         |        |        |        |
|------------|---------|----------|---------|--------|--------|--------|
|            | 217.25  | 216.05   | 215.83  | 128.59 | 129.09 | 129.11 |
|            | 220.53  | 216.12   | 216.25  | 129.22 | 129.42 | 129.34 |
|            | 221.63  | 220.37   | 220.56  | 129.77 | 129.73 | 129.57 |
|            | 222.82  | 221.33   | 221.30  | 130.09 | 130.62 | 130.20 |
|            | 226.39  | 222.01   | 222.14  | 130.36 | 130.79 | 130.79 |
|            | 226.41  | 226.05   | 225.75  | 131.07 | 131.23 | 130.96 |
|            | 243.21  | 226.10   | 226.26  | 132.54 | 132.74 | 132.40 |
|            | 244.49  | 243.04   | 242.70  | 132.67 | 132.93 | 132.94 |
|            | 246.74  | 244.13   | 243.57  | 133.57 | 133.75 | 133.70 |
|            | 247.38  | 246.56   | 246.47  | 134.23 | 134.86 | 134.89 |
|            | 248.74  | 247.15   | 246.60  | 134.76 | 135.00 | 135.07 |
|            | 250.76  | 248.53   | 247.53  | 134.94 | 135.08 | 135.09 |
|            | 251.84  | 250.18   | 249.40  | 135.34 | 135.16 | 135.55 |
|            | 253.52  | 251.25   | 251.73  | 135.56 | 136.35 | 136.25 |
|            | 255.12  | 253.34   | 253.35  | 136.51 | 136.40 | 136.48 |
|            | 256.26  | 254.71   | 253.81  | 137.04 | 137.92 | 138.32 |
|            | 256.42  | 255.06   | 254.50  | 139.80 | 139.83 | 139.44 |
|            | 258.13  | 256.13   | 256.54  | 140.10 | 139.97 | 139.52 |
|            | 258.19  | 257.54   | 256.61  | 140.41 | 140.74 | 140.55 |
|            | 259.35  | 258.06   | 256.84  | 141.41 | 141.44 | 140.89 |
|            | 260.81  | 258.65   | 257.88  | 141.53 | 141.56 | 141.19 |
|            | 260.94  | 260.30   | 259.84  | 142.35 | 141.73 | 141.70 |
|            | 263.86  | 260.46   | 260.02  | 142.95 | 143.02 | 142.45 |
|            | 266.12  | 263.55   | 261.40  | 143.47 | 144.10 | 143.57 |
|            | 267.70  | 265.87   | 264.72  | 144.31 | 144.61 | 145.11 |
|            | 269.17  | 267.31   | 266.47  | 145.79 | 145.79 | 145.54 |
|            | 530.93  | 268.97   | 268.49  | 146.10 | 145.91 | 146.05 |
|            | 545.92  | 392.51   | 341.57  | 146.73 | 147.02 | 146.83 |
|            | 876.07  | 411.02   | 477.52  | 148.03 | 147.46 | 146.91 |
|            | 3573.99 | 3573.69  | 3534.27 | 148.04 | 148.64 | 148.75 |
| Ta/Cu(211) | 22.34   | -1384.83 | 24.37   | 148.66 | 148.79 | 149.12 |
|            | 36.69   | 22.32    | 36.67   | 150.33 | 150.59 | 150.59 |
|            | 45.95   | 35.15    | 46.15   | 150.88 | 151.08 | 150.76 |
|            | 47.22   | 45.89    | 47.10   | 151.75 | 152.15 | 152.18 |
|            | 52.86   | 47.26    | 53.07   | 152.56 | 152.81 | 152.34 |
|            | 58.49   | 51.58    | 58.94   | 153.10 | 152.96 | 153.09 |
|            | 59.57   | 57.55    | 59.51   | 153.87 | 153.38 | 153.16 |
|            | 61.87   | 59.79    | 61.78   | 153.91 | 154.07 | 153.80 |
|            | 62.12   | 61.70    | 62.34   | 154.60 | 155.01 | 154.40 |
|            | 62.21   | 61.96    | 62.50   | 155.67 | 156.10 | 155.46 |
|            | 62.91   | 62.13    | 64.16   | 156.41 | 156.14 | 155.48 |
|            | 64.59   | 64.71    | 67.74   | 156.85 | 156.75 | 155.88 |
|            | 68.04   | 67.18    | 69.20   | 158.02 | 157.81 | 156.75 |
|            | 69.42   | 69.47    | 70.30   | 158.61 | 158.75 | 157.62 |



---

|        |        |        |        |        |        |
|--------|--------|--------|--------|--------|--------|
| 70.18  | 69.89  | 71.11  | 158.82 | 159.86 | 158.59 |
| 71.62  | 71.12  | 71.62  | 160.25 | 160.22 | 159.48 |
| 73.27  | 72.70  | 73.26  | 161.78 | 162.41 | 160.19 |
| 74.11  | 73.27  | 74.72  | 162.90 | 162.85 | 162.52 |
| 74.71  | 74.43  | 76.46  | 163.17 | 163.32 | 162.76 |
| 76.52  | 76.42  | 78.68  | 164.28 | 163.96 | 163.18 |
| 79.44  | 79.14  | 79.97  | 164.80 | 165.23 | 163.74 |
| 81.09  | 80.73  | 80.42  | 165.05 | 165.42 | 164.91 |
| 83.11  | 83.00  | 82.95  | 166.52 | 166.52 | 165.19 |
| 84.59  | 84.20  | 83.82  | 166.79 | 167.44 | 166.40 |
| 85.56  | 85.42  | 84.90  | 169.08 | 168.66 | 167.49 |
| 87.23  | 87.05  | 86.04  | 171.01 | 171.29 | 168.10 |
| 89.46  | 88.62  | 87.24  | 172.91 | 173.31 | 171.69 |
| 89.79  | 90.01  | 90.03  | 173.54 | 174.03 | 172.80 |
| 91.48  | 90.67  | 90.55  | 175.33 | 175.48 | 174.35 |
| 91.56  | 91.53  | 91.17  | 176.33 | 176.16 | 175.08 |
| 92.48  | 92.86  | 91.66  | 176.84 | 177.45 | 175.86 |
| 93.90  | 93.03  | 93.22  | 176.94 | 177.61 | 177.45 |
| 94.58  | 93.50  | 94.03  | 179.01 | 179.35 | 177.85 |
| 99.71  | 99.67  | 97.27  | 179.19 | 179.98 | 179.37 |
| 101.08 | 99.90  | 99.22  | 181.52 | 182.04 | 180.42 |
| 102.39 | 102.05 | 100.89 | 181.98 | 182.15 | 181.21 |
| 103.54 | 102.36 | 102.25 | 183.56 | 183.30 | 182.14 |
| 103.71 | 103.02 | 103.05 | 184.20 | 184.76 | 182.83 |
| 104.04 | 103.16 | 103.33 | 186.51 | 186.90 | 184.78 |
| 105.26 | 104.64 | 103.76 | 187.23 | 187.29 | 186.77 |
| 105.93 | 105.17 | 104.60 | 187.56 | 187.41 | 187.06 |
| 106.21 | 106.03 | 105.08 | 189.06 | 189.38 | 187.27 |
| 106.56 | 106.18 | 105.34 | 189.58 | 190.07 | 189.34 |
| 106.93 | 106.83 | 106.66 | 191.98 | 192.01 | 190.03 |
| 107.40 | 107.09 | 107.26 | 193.71 | 193.49 | 191.86 |
| 108.09 | 107.53 | 107.45 | 196.70 | 196.74 | 193.16 |
| 109.15 | 108.36 | 107.49 | 198.69 | 198.80 | 196.70 |
| 109.88 | 109.27 | 109.15 | 199.28 | 199.11 | 198.61 |
| 110.98 | 110.06 | 110.16 | 199.42 | 199.79 | 198.62 |
| 111.91 | 110.72 | 111.12 | 199.98 | 199.83 | 199.27 |
| 112.74 | 111.98 | 111.61 | 200.58 | 200.82 | 199.59 |
| 119.38 | 112.17 | 112.00 | 201.62 | 201.87 | 200.62 |
| 119.47 | 118.60 | 117.80 | 201.65 | 202.14 | 201.64 |
| 121.78 | 119.23 | 118.99 | 203.16 | 202.67 | 202.02 |
| 122.04 | 122.36 | 122.79 | 203.24 | 202.96 | 202.41 |
| 122.45 | 122.48 | 123.23 | 203.77 | 203.91 | 202.50 |
| 122.92 | 123.12 | 123.40 | 205.86 | 205.06 | 203.46 |
| 123.22 | 123.17 | 123.53 | 209.25 | 208.99 | 203.61 |

---

---

|        |        |        |           |         |          |         |
|--------|--------|--------|-----------|---------|----------|---------|
| 123.80 | 124.28 | 124.81 |           | 209.83  | 209.55   | 208.71  |
| 126.03 | 124.64 | 124.98 |           | 210.16  | 210.23   | 208.72  |
| 126.97 | 126.36 | 126.51 |           | 212.27  | 211.45   | 209.97  |
| 127.56 | 126.94 | 126.72 |           | 212.64  | 211.69   | 210.86  |
| 128.03 | 127.12 | 127.27 |           | 213.27  | 213.18   | 211.05  |
| 128.52 | 128.25 | 128.00 |           | 214.61  | 214.76   | 212.74  |
| 129.87 | 128.87 | 128.60 |           | 216.00  | 215.90   | 214.95  |
| 130.10 | 129.51 | 129.04 |           | 217.31  | 216.71   | 215.56  |
| 130.62 | 129.71 | 129.44 |           | 220.15  | 219.81   | 216.03  |
| 130.84 | 130.22 | 129.68 |           | 221.12  | 220.78   | 219.76  |
| 131.91 | 130.72 | 129.92 |           | 221.17  | 220.85   | 220.48  |
| 132.99 | 131.49 | 131.07 |           | 224.51  | 224.82   | 220.58  |
| 133.25 | 133.36 | 132.90 |           | 228.35  | 228.69   | 224.72  |
| 134.17 | 133.42 | 133.11 |           | 228.53  | 228.88   | 228.55  |
| 134.70 | 133.99 | 133.80 |           | 229.54  | 229.89   | 228.81  |
| 134.86 | 134.65 | 134.30 |           | 230.01  | 230.01   | 229.47  |
| 135.63 | 134.70 | 134.69 |           | 236.24  | 235.72   | 229.96  |
| 137.20 | 135.39 | 134.97 |           | 237.15  | 236.63   | 234.93  |
| 137.73 | 137.41 | 136.13 |           | 240.03  | 239.50   | 235.99  |
| 138.27 | 137.76 | 137.56 |           | 240.97  | 240.25   | 238.29  |
| 139.49 | 138.23 | 138.01 |           | 241.07  | 240.54   | 239.37  |
| 140.02 | 139.45 | 139.06 |           | 241.57  | 241.36   | 239.74  |
| 141.01 | 140.04 | 139.49 |           | 242.06  | 241.74   | 240.72  |
| 141.15 | 140.81 | 139.92 |           | 243.46  | 243.19   | 241.42  |
| 141.69 | 141.26 | 140.73 |           | 243.87  | 243.69   | 242.63  |
| 141.87 | 141.57 | 141.42 |           | 244.50  | 244.05   | 242.88  |
| 141.91 | 141.58 | 141.56 |           | 245.43  | 244.78   | 243.92  |
| 143.01 | 142.28 | 142.05 |           | 246.43  | 245.48   | 244.56  |
| 143.64 | 143.28 | 142.65 |           | 246.51  | 246.01   | 244.75  |
| 145.52 | 143.85 | 142.92 |           | 246.93  | 246.59   | 244.96  |
| 146.07 | 145.07 | 143.91 |           | 247.76  | 247.73   | 246.02  |
| 146.90 | 145.76 | 145.19 |           | 248.01  | 248.09   | 246.37  |
| 147.24 | 146.71 | 145.80 |           | 248.47  | 248.39   | 247.64  |
| 147.66 | 146.96 | 146.20 |           | 250.64  | 250.62   | 248.41  |
| 150.32 | 147.71 | 147.59 |           | 251.66  | 251.23   | 250.36  |
| 150.98 | 150.37 | 147.86 |           | 252.18  | 251.89   | 250.74  |
| 151.50 | 150.78 | 149.93 |           | 255.50  | 255.38   | 251.09  |
| 152.72 | 151.71 | 150.39 |           | 548.61  | 317.33   | 254.64  |
| 153.21 | 152.69 | 151.68 |           | 584.45  | 393.33   | 340.47  |
| 154.24 | 153.17 | 152.37 |           | 778.55  | 470.46   | 494.98  |
| 154.31 | 153.77 | 152.40 |           | 3566.57 | 3571.27  | 3498.48 |
| 155.75 | 154.26 | 152.89 | W/Cu(211) | 23.55   | -1224.30 | 23.95   |
| 157.23 | 155.12 | 153.85 |           | 40.72   | 26.28    | 40.73   |
| 157.52 | 155.56 | 154.29 |           | 41.55   | 40.82    | 43.44   |

---

---

|        |        |        |        |        |        |
|--------|--------|--------|--------|--------|--------|
| 157.98 | 157.00 | 155.38 | 45.83  | 42.91  | 45.78  |
| 158.05 | 158.17 | 157.03 | 50.05  | 45.94  | 51.00  |
| 158.98 | 158.33 | 157.77 | 53.94  | 46.39  | 53.37  |
| 159.32 | 158.37 | 158.32 | 56.93  | 50.87  | 58.68  |
| 160.23 | 159.09 | 158.49 | 59.18  | 54.09  | 58.94  |
| 161.18 | 160.15 | 158.86 | 61.61  | 57.05  | 61.22  |
| 161.35 | 160.89 | 160.65 | 67.82  | 59.24  | 66.58  |
| 162.53 | 161.25 | 160.95 | 68.99  | 62.21  | 67.27  |
| 162.71 | 162.48 | 161.30 | 70.35  | 68.02  | 69.63  |
| 163.94 | 162.56 | 162.29 | 70.51  | 69.11  | 69.69  |
| 165.43 | 163.91 | 162.50 | 71.12  | 69.68  | 70.97  |
| 167.49 | 164.87 | 163.46 | 71.43  | 70.84  | 72.36  |
| 167.72 | 167.60 | 164.93 | 75.91  | 71.15  | 73.80  |
| 167.97 | 167.62 | 167.26 | 77.51  | 71.73  | 74.15  |
| 168.26 | 167.94 | 167.45 | 79.10  | 75.04  | 77.63  |
| 168.66 | 168.42 | 167.83 | 79.95  | 77.75  | 78.23  |
| 169.13 | 168.78 | 168.24 | 80.00  | 79.30  | 79.52  |
| 169.86 | 168.82 | 168.36 | 82.75  | 80.43  | 80.25  |
| 170.19 | 169.13 | 168.54 | 84.83  | 80.62  | 81.76  |
| 170.51 | 169.62 | 169.09 | 84.93  | 82.82  | 83.82  |
| 171.27 | 169.99 | 169.56 | 86.02  | 84.92  | 84.97  |
| 172.19 | 171.05 | 169.74 | 87.04  | 85.00  | 86.70  |
| 172.88 | 172.04 | 170.74 | 88.08  | 87.53  | 87.31  |
| 175.14 | 172.80 | 171.49 | 88.11  | 88.53  | 88.00  |
| 175.17 | 175.09 | 172.90 | 89.14  | 88.61  | 88.53  |
| 176.26 | 175.21 | 173.65 | 89.30  | 89.17  | 88.86  |
| 179.30 | 175.95 | 174.57 | 92.19  | 89.39  | 89.25  |
| 181.92 | 179.81 | 175.09 | 93.10  | 92.65  | 92.27  |
| 181.99 | 182.10 | 180.51 | 95.55  | 93.33  | 93.37  |
| 188.52 | 183.03 | 182.05 | 99.07  | 95.10  | 96.28  |
| 188.96 | 188.52 | 183.23 | 99.59  | 95.68  | 98.11  |
| 189.57 | 188.84 | 188.28 | 100.74 | 99.48  | 99.04  |
| 191.69 | 189.11 | 188.37 | 100.89 | 99.73  | 99.62  |
| 192.16 | 191.25 | 188.64 | 101.35 | 100.81 | 100.52 |
| 192.65 | 191.87 | 190.92 | 101.77 | 100.94 | 100.68 |
| 193.40 | 192.14 | 191.23 | 103.13 | 101.50 | 101.89 |
| 194.69 | 193.34 | 191.56 | 103.45 | 102.03 | 102.10 |
| 195.08 | 194.00 | 193.14 | 104.28 | 102.82 | 102.78 |
| 195.37 | 194.76 | 193.76 | 105.16 | 103.81 | 104.36 |
| 195.66 | 195.37 | 194.33 | 105.91 | 104.44 | 104.66 |
| 197.19 | 195.92 | 195.13 | 106.32 | 104.89 | 105.76 |
| 197.49 | 196.94 | 195.57 | 106.47 | 106.32 | 106.39 |
| 198.25 | 197.11 | 196.81 | 107.31 | 106.53 | 106.94 |
| 200.72 | 198.10 | 197.08 | 107.59 | 106.76 | 106.96 |

---

---

|        |        |        |        |        |        |
|--------|--------|--------|--------|--------|--------|
| 201.53 | 200.80 | 197.39 | 108.81 | 107.08 | 107.99 |
| 203.76 | 201.24 | 199.90 | 109.37 | 107.91 | 108.78 |
| 203.87 | 203.28 | 200.79 | 111.10 | 109.22 | 109.45 |
| 205.70 | 204.40 | 202.06 | 111.19 | 109.75 | 111.60 |
| 206.51 | 204.87 | 202.38 | 116.20 | 111.51 | 111.84 |
| 207.21 | 205.26 | 204.00 | 117.52 | 111.74 | 116.88 |
| 209.36 | 206.79 | 204.41 | 118.70 | 117.49 | 117.56 |
| 209.57 | 209.38 | 206.13 | 120.00 | 117.97 | 118.94 |
| 209.66 | 209.85 | 209.04 | 121.60 | 120.47 | 119.65 |
| 210.19 | 209.97 | 209.79 | 122.46 | 121.67 | 121.40 |
| 211.31 | 210.46 | 209.88 | 122.88 | 122.73 | 122.23 |
| 213.01 | 211.12 | 210.47 | 123.42 | 123.28 | 122.37 |
| 214.31 | 212.78 | 211.07 | 123.68 | 123.44 | 123.06 |
| 214.59 | 214.06 | 212.50 | 123.87 | 123.59 | 123.31 |
| 215.25 | 214.19 | 213.83 | 123.97 | 123.86 | 123.60 |
| 215.59 | 215.15 | 213.98 | 124.06 | 123.89 | 124.29 |
| 216.09 | 215.88 | 214.42 | 125.01 | 124.83 | 125.35 |
| 216.35 | 216.50 | 215.25 | 125.79 | 125.61 | 125.88 |
| 217.44 | 217.16 | 216.50 | 126.15 | 125.83 | 126.34 |
| 218.71 | 217.46 | 216.94 | 128.33 | 126.51 | 126.60 |
| 220.21 | 218.68 | 217.36 | 129.08 | 126.93 | 126.83 |
| 223.68 | 219.41 | 218.56 | 129.25 | 128.99 | 128.41 |
| 225.88 | 225.58 | 219.00 | 129.90 | 129.42 | 129.77 |
| 226.39 | 225.75 | 225.22 | 131.03 | 130.12 | 129.89 |
| 234.03 | 232.40 | 225.27 | 131.42 | 130.22 | 130.16 |
| 239.96 | 239.69 | 232.33 | 132.05 | 131.32 | 130.52 |
| 240.21 | 239.86 | 239.31 | 132.83 | 131.73 | 131.29 |
| 244.41 | 243.93 | 239.43 | 133.66 | 131.93 | 132.11 |
| 244.94 | 244.59 | 243.40 | 134.07 | 133.20 | 132.50 |
| 246.36 | 246.04 | 244.55 | 135.21 | 133.79 | 133.03 |
| 246.73 | 246.51 | 245.05 | 135.59 | 135.07 | 135.09 |
| 248.50 | 248.33 | 246.27 | 135.75 | 135.57 | 135.22 |
| 248.82 | 248.37 | 247.91 | 138.13 | 135.61 | 135.61 |
| 250.29 | 250.35 | 248.04 | 138.78 | 138.13 | 137.97 |
| 251.41 | 250.65 | 249.80 | 141.12 | 138.63 | 138.59 |
| 251.51 | 251.38 | 250.03 | 141.23 | 140.97 | 140.63 |
| 252.08 | 251.67 | 250.75 | 141.58 | 141.28 | 141.06 |
| 252.37 | 252.24 | 251.05 | 142.38 | 141.89 | 141.79 |
| 253.51 | 252.85 | 252.05 | 143.78 | 142.59 | 142.56 |
| 254.53 | 254.14 | 252.66 | 144.77 | 144.04 | 143.43 |
| 255.82 | 254.44 | 254.34 | 145.81 | 145.19 | 144.26 |
| 256.08 | 255.92 | 255.50 | 147.46 | 145.50 | 144.88 |
| 258.25 | 257.92 | 255.59 | 147.71 | 147.76 | 148.03 |
| 260.54 | 260.35 | 257.69 | 148.86 | 148.02 | 148.08 |

---

|            |         |          |         |        |        |        |
|------------|---------|----------|---------|--------|--------|--------|
|            | 262.25  | 262.07   | 260.07  | 148.89 | 148.71 | 148.48 |
|            | 600.80  | 262.24   | 262.04  | 149.29 | 148.97 | 148.58 |
|            | 619.16  | 431.65   | 330.40  | 150.36 | 149.66 | 149.50 |
|            | 881.62  | 453.20   | 491.55  | 152.28 | 150.32 | 149.62 |
|            | 3602.16 | 3574.90  | 3517.56 | 152.55 | 152.03 | 150.23 |
| Sc/Cu(320) | 7.50    | -1371.09 | 6.75    | 153.39 | 152.10 | 150.45 |
|            | 10.36   | 7.80     | 10.57   | 153.42 | 153.06 | 151.60 |
|            | 12.51   | 12.00    | 13.49   | 154.53 | 153.39 | 152.17 |
|            | 28.41   | 17.80    | 16.27   | 154.95 | 154.35 | 153.68 |
|            | 28.92   | 26.62    | 27.15   | 155.85 | 154.60 | 153.90 |
|            | 29.26   | 28.43    | 28.69   | 156.11 | 155.94 | 154.98 |
|            | 35.60   | 29.15    | 30.07   | 156.58 | 156.19 | 155.62 |
|            | 38.70   | 35.50    | 35.64   | 157.92 | 156.52 | 156.03 |
|            | 40.52   | 38.50    | 38.46   | 159.00 | 157.56 | 156.90 |
|            | 42.44   | 40.81    | 40.75   | 160.05 | 158.86 | 157.84 |
|            | 51.53   | 42.28    | 41.96   | 160.22 | 159.82 | 159.06 |
|            | 53.51   | 50.83    | 47.44   | 160.38 | 160.08 | 159.50 |
|            | 55.42   | 53.44    | 52.75   | 160.66 | 160.50 | 159.77 |
|            | 56.84   | 55.77    | 53.92   | 161.62 | 160.87 | 160.75 |
|            | 58.08   | 57.41    | 57.51   | 162.08 | 161.63 | 160.96 |
|            | 61.16   | 58.58    | 58.06   | 162.62 | 161.97 | 160.98 |
|            | 62.47   | 60.02    | 59.36   | 163.25 | 162.44 | 161.46 |
|            | 62.98   | 61.90    | 61.56   | 166.20 | 163.50 | 163.05 |
|            | 63.22   | 62.69    | 62.84   | 166.63 | 166.36 | 166.41 |
|            | 63.46   | 63.13    | 63.22   | 167.29 | 166.70 | 166.61 |
|            | 63.94   | 63.50    | 63.46   | 167.51 | 167.20 | 166.72 |
|            | 64.58   | 63.69    | 63.87   | 168.40 | 167.23 | 166.94 |
|            | 65.36   | 64.07    | 64.15   | 168.65 | 168.33 | 167.94 |
|            | 65.49   | 64.72    | 64.54   | 170.08 | 168.58 | 168.07 |
|            | 65.86   | 65.68    | 65.31   | 170.25 | 170.15 | 169.55 |
|            | 66.46   | 66.00    | 65.44   | 170.67 | 170.25 | 169.95 |
|            | 68.63   | 66.38    | 66.32   | 171.95 | 170.91 | 171.15 |
|            | 69.12   | 68.30    | 67.54   | 172.09 | 171.94 | 171.71 |
|            | 69.55   | 69.28    | 68.66   | 172.32 | 172.21 | 172.08 |
|            | 69.66   | 69.29    | 69.07   | 173.51 | 173.37 | 172.93 |
|            | 71.11   | 69.77    | 69.56   | 174.44 | 173.86 | 172.96 |
|            | 72.11   | 70.83    | 70.61   | 175.17 | 174.69 | 174.36 |
|            | 72.66   | 71.55    | 71.48   | 175.39 | 175.35 | 175.02 |
|            | 73.24   | 72.78    | 72.34   | 177.99 | 175.64 | 175.48 |
|            | 74.21   | 73.51    | 73.26   | 180.84 | 178.04 | 178.45 |
|            | 76.92   | 73.65    | 73.74   | 180.89 | 180.54 | 180.39 |
|            | 77.50   | 75.35    | 74.48   | 182.45 | 180.68 | 180.61 |
|            | 77.68   | 76.92    | 76.65   | 182.97 | 182.60 | 182.58 |
|            | 78.50   | 77.04    | 77.06   | 183.80 | 182.86 | 182.91 |

---

|        |        |        |        |        |        |
|--------|--------|--------|--------|--------|--------|
| 80.23  | 77.58  | 77.48  | 184.28 | 183.62 | 183.37 |
| 81.23  | 78.85  | 78.77  | 186.20 | 184.22 | 183.69 |
| 83.17  | 80.46  | 80.89  | 186.82 | 186.66 | 186.18 |
| 83.58  | 81.39  | 81.81  | 187.30 | 186.95 | 186.65 |
| 88.62  | 83.56  | 83.66  | 189.57 | 187.35 | 187.71 |
| 89.01  | 84.14  | 84.14  | 190.78 | 188.91 | 188.67 |
| 89.49  | 88.59  | 87.30  | 192.46 | 190.66 | 190.73 |
| 90.31  | 89.16  | 88.65  | 193.34 | 192.11 | 191.82 |
| 90.46  | 89.69  | 89.23  | 193.98 | 192.65 | 193.15 |
| 91.03  | 89.83  | 89.60  | 194.49 | 193.87 | 193.76 |
| 91.51  | 90.59  | 90.09  | 196.12 | 194.42 | 194.06 |
| 91.91  | 91.13  | 90.94  | 197.39 | 196.70 | 196.22 |
| 92.01  | 91.32  | 91.36  | 197.94 | 196.96 | 196.47 |
| 95.19  | 91.90  | 91.45  | 199.20 | 197.91 | 197.85 |
| 95.30  | 92.05  | 92.09  | 199.53 | 198.87 | 199.26 |
| 97.33  | 94.72  | 92.18  | 202.46 | 199.75 | 199.30 |
| 98.55  | 94.93  | 94.70  | 202.82 | 202.10 | 201.01 |
| 99.54  | 97.91  | 94.96  | 203.41 | 202.86 | 202.62 |
| 99.77  | 98.58  | 97.77  | 207.59 | 203.56 | 203.34 |
| 100.21 | 99.29  | 98.39  | 207.83 | 207.14 | 206.78 |
| 101.29 | 100.03 | 99.31  | 208.08 | 207.89 | 207.91 |
| 102.15 | 100.12 | 100.03 | 209.76 | 208.13 | 208.31 |
| 103.01 | 101.19 | 100.42 | 209.94 | 209.96 | 208.95 |
| 103.44 | 101.72 | 101.53 | 210.57 | 210.07 | 210.36 |
| 105.04 | 103.22 | 101.88 | 213.63 | 210.71 | 210.43 |
| 105.98 | 104.21 | 103.17 | 214.18 | 214.00 | 214.40 |
| 106.91 | 104.52 | 103.71 | 215.13 | 214.92 | 214.82 |
| 107.94 | 105.70 | 104.60 | 218.44 | 215.46 | 215.57 |
| 108.38 | 106.95 | 105.83 | 218.79 | 218.52 | 217.85 |
| 108.87 | 107.86 | 106.62 | 218.93 | 218.61 | 218.64 |
| 110.45 | 108.00 | 107.60 | 219.17 | 219.23 | 219.16 |
| 110.70 | 108.71 | 108.47 | 221.70 | 219.38 | 219.36 |
| 110.85 | 110.49 | 108.71 | 223.00 | 222.02 | 222.19 |
| 112.76 | 111.01 | 110.58 | 229.36 | 223.05 | 222.63 |
| 113.19 | 111.21 | 111.12 | 229.86 | 229.77 | 229.40 |
| 113.54 | 113.10 | 112.06 | 233.49 | 229.90 | 229.83 |
| 114.06 | 113.43 | 112.98 | 242.28 | 234.07 | 234.46 |
| 114.70 | 114.02 | 113.37 | 243.35 | 242.06 | 240.55 |
| 114.98 | 114.65 | 114.20 | 246.29 | 243.18 | 241.97 |
| 115.76 | 115.13 | 114.62 | 248.02 | 246.06 | 244.29 |
| 117.33 | 116.19 | 114.99 | 249.45 | 248.16 | 245.56 |
| 117.46 | 116.91 | 116.03 | 249.77 | 249.68 | 246.33 |
| 118.24 | 117.23 | 116.95 | 250.70 | 249.73 | 248.26 |
| 118.49 | 118.21 | 117.75 | 251.71 | 250.59 | 249.15 |

---

---

|        |        |        |           |         |          |         |
|--------|--------|--------|-----------|---------|----------|---------|
| 118.72 | 118.41 | 118.21 |           | 253.63  | 251.05   | 249.41  |
| 119.05 | 118.79 | 118.21 |           | 253.70  | 252.96   | 250.90  |
| 119.42 | 119.12 | 118.71 |           | 254.29  | 253.04   | 250.95  |
| 119.86 | 119.85 | 118.84 |           | 254.68  | 254.06   | 252.24  |
| 120.12 | 120.08 | 119.53 |           | 256.31  | 254.65   | 253.07  |
| 120.98 | 120.44 | 119.78 |           | 256.81  | 255.45   | 253.26  |
| 121.53 | 120.97 | 120.01 |           | 257.85  | 255.99   | 253.96  |
| 121.81 | 121.46 | 120.74 |           | 259.05  | 257.33   | 254.39  |
| 122.66 | 121.88 | 121.40 |           | 260.68  | 258.61   | 254.92  |
| 124.26 | 122.34 | 121.74 |           | 261.69  | 260.48   | 259.38  |
| 125.70 | 124.27 | 121.94 |           | 263.88  | 260.81   | 261.38  |
| 126.09 | 125.84 | 124.17 |           | 267.04  | 263.27   | 261.67  |
| 126.42 | 125.88 | 125.44 |           | 559.87  | 267.48   | 268.98  |
| 127.09 | 126.46 | 125.98 |           | 595.36  | 408.40   | 347.67  |
| 127.42 | 126.74 | 126.02 |           | 930.39  | 489.55   | 541.29  |
| 128.63 | 127.25 | 126.54 |           | 3598.66 | 3570.36  | 3521.21 |
| 128.90 | 128.51 | 127.31 | V/Cu(320) | 11.88   | -1982.05 | 12.26   |
| 129.67 | 128.83 | 128.49 |           | 15.54   | 15.90    | 15.77   |
| 129.86 | 129.33 | 128.79 |           | 16.56   | 16.38    | 17.08   |
| 130.60 | 129.59 | 129.24 |           | 17.03   | 24.18    | 23.69   |
| 131.92 | 130.20 | 129.47 |           | 24.44   | 25.29    | 24.63   |
| 133.21 | 132.05 | 130.19 |           | 25.38   | 26.12    | 25.24   |
| 135.29 | 132.83 | 131.96 |           | 26.46   | 33.62    | 31.05   |
| 137.34 | 135.35 | 132.72 |           | 34.01   | 35.24    | 32.75   |
| 137.87 | 136.46 | 135.69 |           | 35.52   | 37.19    | 34.19   |
| 138.31 | 137.21 | 137.09 |           | 37.34   | 37.87    | 35.05   |
| 138.61 | 137.90 | 137.55 |           | 38.27   | 47.94    | 36.84   |
| 139.17 | 138.66 | 138.24 |           | 49.00   | 49.81    | 37.78   |
| 140.06 | 138.87 | 138.54 |           | 49.77   | 50.85    | 49.06   |
| 140.91 | 140.37 | 138.68 |           | 53.45   | 53.37    | 49.28   |
| 141.84 | 140.59 | 140.30 |           | 54.17   | 54.17    | 51.53   |
| 143.69 | 141.52 | 140.59 |           | 54.33   | 54.75    | 53.19   |
| 145.86 | 142.28 | 141.36 |           | 55.15   | 55.47    | 54.03   |
| 146.24 | 144.52 | 143.92 |           | 55.68   | 57.48    | 54.84   |
| 147.13 | 145.96 | 145.55 |           | 57.47   | 57.53    | 55.21   |
| 147.57 | 146.38 | 146.04 |           | 57.99   | 58.06    | 57.54   |
| 148.08 | 147.20 | 147.03 |           | 58.76   | 59.31    | 57.70   |
| 148.47 | 147.65 | 147.55 |           | 59.36   | 62.07    | 58.53   |
| 148.85 | 148.05 | 147.89 |           | 62.85   | 62.91    | 60.26   |
| 149.26 | 148.48 | 148.29 |           | 63.37   | 63.53    | 62.23   |
| 149.81 | 148.62 | 148.53 |           | 63.62   | 63.68    | 62.76   |
| 149.93 | 149.26 | 148.98 |           | 63.96   | 64.26    | 63.43   |
| 150.76 | 149.97 | 149.59 |           | 64.58   | 64.55    | 63.91   |
| 151.77 | 150.10 | 149.86 |           | 65.16   | 64.98    | 64.09   |

---

---

|        |        |        |        |        |        |
|--------|--------|--------|--------|--------|--------|
| 152.88 | 151.19 | 150.75 | 65.53  | 65.62  | 64.62  |
| 153.24 | 152.17 | 151.73 | 66.44  | 66.83  | 65.51  |
| 153.72 | 153.11 | 152.75 | 67.40  | 67.45  | 65.82  |
| 154.86 | 153.45 | 153.26 | 67.66  | 68.51  | 67.02  |
| 155.11 | 153.65 | 153.45 | 69.68  | 69.69  | 67.67  |
| 155.57 | 155.04 | 154.67 | 69.99  | 70.13  | 68.64  |
| 157.13 | 155.43 | 155.44 | 70.24  | 70.72  | 69.65  |
| 159.57 | 155.89 | 155.86 | 71.29  | 71.31  | 70.22  |
| 160.26 | 157.04 | 156.97 | 71.48  | 71.65  | 70.89  |
| 161.85 | 159.82 | 159.51 | 72.05  | 74.94  | 71.20  |
| 162.49 | 160.61 | 160.22 | 75.28  | 75.37  | 71.78  |
| 162.78 | 162.28 | 161.81 | 76.35  | 76.62  | 75.16  |
| 162.98 | 162.51 | 162.03 | 77.95  | 78.01  | 75.71  |
| 163.36 | 163.13 | 162.43 | 79.60  | 79.64  | 78.40  |
| 164.07 | 163.20 | 162.68 | 80.84  | 81.10  | 79.36  |
| 164.48 | 163.53 | 163.20 | 81.74  | 82.78  | 80.73  |
| 164.63 | 164.33 | 163.45 | 85.86  | 85.14  | 81.18  |
| 165.48 | 164.66 | 164.25 | 88.00  | 87.98  | 87.58  |
| 168.44 | 164.88 | 164.34 | 89.09  | 88.78  | 88.11  |
| 169.52 | 165.70 | 164.89 | 90.13  | 90.16  | 89.69  |
| 170.48 | 168.92 | 168.28 | 90.46  | 90.74  | 90.05  |
| 171.89 | 169.61 | 169.14 | 91.02  | 91.25  | 90.66  |
| 173.15 | 170.78 | 170.32 | 91.85  | 91.94  | 90.86  |
| 173.33 | 171.97 | 171.85 | 92.27  | 92.26  | 91.36  |
| 174.08 | 173.24 | 173.05 | 92.91  | 93.10  | 91.97  |
| 175.73 | 173.63 | 173.35 | 93.59  | 93.77  | 92.58  |
| 176.35 | 174.06 | 173.83 | 94.52  | 94.63  | 93.49  |
| 176.86 | 176.21 | 175.51 | 94.96  | 95.19  | 94.30  |
| 177.24 | 176.74 | 176.43 | 95.87  | 95.81  | 94.92  |
| 178.44 | 177.45 | 176.76 | 96.83  | 96.54  | 95.66  |
| 178.59 | 177.53 | 177.04 | 97.14  | 96.85  | 95.80  |
| 179.29 | 178.50 | 178.17 | 97.41  | 98.03  | 96.89  |
| 179.76 | 178.75 | 178.29 | 98.31  | 98.29  | 97.12  |
| 180.11 | 179.51 | 178.93 | 99.05  | 99.02  | 97.58  |
| 180.90 | 180.06 | 179.46 | 102.25 | 102.24 | 100.63 |
| 181.12 | 180.80 | 180.46 | 102.92 | 102.92 | 101.94 |
| 181.81 | 181.12 | 181.03 | 103.02 | 103.08 | 102.21 |
| 184.36 | 181.79 | 181.31 | 103.74 | 103.67 | 103.11 |
| 185.36 | 182.86 | 182.33 | 104.30 | 104.23 | 103.64 |
| 186.47 | 184.89 | 184.35 | 104.61 | 104.41 | 104.11 |
| 187.05 | 185.87 | 185.41 | 105.78 | 105.45 | 104.34 |
| 188.31 | 186.67 | 186.20 | 106.40 | 106.40 | 105.38 |
| 188.75 | 187.46 | 186.92 | 107.17 | 106.98 | 106.37 |
| 189.01 | 188.66 | 187.96 | 107.32 | 107.27 | 106.69 |

---



---

|        |        |        |        |        |        |
|--------|--------|--------|--------|--------|--------|
| 189.81 | 189.21 | 188.31 | 110.52 | 110.15 | 107.20 |
| 190.23 | 189.33 | 189.00 | 111.16 | 110.59 | 108.88 |
| 192.84 | 189.98 | 189.22 | 111.64 | 111.70 | 110.23 |
| 193.66 | 190.24 | 189.63 | 112.43 | 112.45 | 111.26 |
| 195.49 | 192.36 | 191.22 | 113.11 | 113.04 | 112.00 |
| 196.25 | 193.19 | 192.64 | 113.92 | 113.89 | 112.42 |
| 196.77 | 194.01 | 193.57 | 114.19 | 114.03 | 112.83 |
| 198.02 | 195.43 | 194.72 | 114.36 | 114.35 | 113.67 |
| 200.33 | 196.73 | 196.21 | 114.99 | 114.82 | 113.83 |
| 200.63 | 198.19 | 197.97 | 115.06 | 114.93 | 114.36 |
| 201.81 | 198.91 | 198.13 | 115.16 | 114.98 | 114.51 |
| 203.34 | 200.33 | 199.95 | 115.69 | 115.53 | 114.58 |
| 203.98 | 201.67 | 201.23 | 115.95 | 115.62 | 115.07 |
| 204.38 | 203.19 | 202.68 | 116.36 | 116.31 | 115.26 |
| 205.88 | 203.80 | 203.12 | 116.42 | 116.41 | 115.51 |
| 206.75 | 204.34 | 203.62 | 116.84 | 116.57 | 115.95 |
| 206.83 | 205.33 | 204.47 | 116.90 | 117.05 | 116.16 |
| 208.43 | 206.74 | 206.20 | 117.35 | 117.11 | 116.25 |
| 208.79 | 207.04 | 206.47 | 117.49 | 117.36 | 116.68 |
| 209.16 | 207.92 | 206.78 | 120.05 | 119.91 | 117.12 |
| 209.78 | 208.57 | 207.86 | 121.17 | 120.85 | 119.30 |
| 212.05 | 209.22 | 208.83 | 121.56 | 121.40 | 120.68 |
| 212.86 | 209.91 | 209.13 | 122.02 | 121.72 | 120.98 |
| 213.30 | 210.85 | 209.96 | 124.07 | 123.40 | 121.25 |
| 213.59 | 212.33 | 211.74 | 124.82 | 124.62 | 122.18 |
| 214.23 | 212.96 | 212.47 | 125.98 | 125.97 | 123.51 |
| 215.63 | 213.48 | 212.92 | 127.00 | 126.79 | 125.52 |
| 215.93 | 213.85 | 213.55 | 127.11 | 127.05 | 126.31 |
| 216.43 | 215.32 | 214.79 | 127.35 | 127.47 | 126.48 |
| 216.87 | 216.07 | 215.68 | 128.14 | 127.76 | 126.84 |
| 217.60 | 216.56 | 215.93 | 128.43 | 128.34 | 127.52 |
| 217.66 | 216.96 | 216.46 | 129.03 | 128.66 | 127.96 |
| 218.55 | 217.68 | 217.05 | 129.19 | 129.08 | 128.47 |
| 219.11 | 217.87 | 217.33 | 130.08 | 130.00 | 128.80 |
| 219.64 | 218.31 | 217.75 | 131.48 | 131.49 | 129.46 |
| 220.20 | 219.07 | 218.42 | 132.40 | 132.46 | 130.25 |
| 221.03 | 219.28 | 218.84 | 133.14 | 133.04 | 132.20 |
| 221.47 | 220.07 | 219.54 | 136.91 | 136.41 | 132.64 |
| 221.83 | 220.87 | 220.46 | 137.61 | 137.53 | 136.14 |
| 222.31 | 221.24 | 220.65 | 137.84 | 137.77 | 137.03 |
| 223.28 | 221.56 | 221.21 | 138.39 | 138.22 | 137.32 |
| 223.66 | 222.38 | 222.04 | 139.18 | 138.97 | 137.45 |
| 224.86 | 223.28 | 222.92 | 139.56 | 139.93 | 138.68 |
| 226.08 | 223.46 | 223.05 | 141.32 | 141.17 | 139.08 |

---

|            |         |          |         |        |        |        |
|------------|---------|----------|---------|--------|--------|--------|
|            | 226.67  | 224.75   | 224.51  | 141.75 | 141.79 | 140.88 |
|            | 226.81  | 226.23   | 225.69  | 142.49 | 142.55 | 141.15 |
|            | 227.25  | 226.55   | 226.06  | 144.95 | 144.71 | 142.33 |
|            | 228.11  | 226.69   | 226.10  | 145.16 | 145.15 | 144.01 |
|            | 228.23  | 227.36   | 226.77  | 146.42 | 146.11 | 144.63 |
|            | 229.23  | 227.70   | 226.92  | 147.37 | 146.87 | 145.74 |
|            | 229.50  | 228.31   | 227.76  | 147.93 | 147.40 | 146.66 |
|            | 230.50  | 229.24   | 228.11  | 148.30 | 148.08 | 147.08 |
|            | 230.76  | 229.35   | 228.83  | 148.50 | 148.47 | 147.76 |
|            | 231.79  | 230.54   | 229.71  | 148.96 | 148.75 | 147.78 |
|            | 232.03  | 230.65   | 230.23  | 149.56 | 149.71 | 148.06 |
|            | 232.57  | 231.74   | 231.01  | 150.21 | 150.22 | 149.32 |
|            | 232.98  | 231.97   | 231.35  | 151.12 | 151.15 | 149.58 |
|            | 233.47  | 232.24   | 231.78  | 152.26 | 152.12 | 150.21 |
|            | 235.00  | 232.77   | 232.28  | 153.35 | 153.36 | 151.82 |
|            | 235.52  | 233.16   | 232.43  | 154.33 | 154.21 | 152.79 |
|            | 236.39  | 234.56   | 233.62  | 154.83 | 155.09 | 153.77 |
|            | 237.36  | 235.02   | 234.49  | 155.62 | 155.52 | 154.08 |
|            | 237.94  | 236.52   | 235.74  | 158.03 | 156.71 | 155.24 |
|            | 238.22  | 236.57   | 235.98  | 158.56 | 158.26 | 155.48 |
|            | 238.91  | 237.97   | 237.28  | 160.21 | 160.09 | 157.50 |
|            | 240.10  | 238.10   | 237.64  | 160.86 | 160.61 | 159.57 |
|            | 240.92  | 239.27   | 238.48  | 161.22 | 161.21 | 160.03 |
|            | 365.44  | 240.03   | 239.01  | 161.75 | 161.62 | 160.28 |
|            | 390.96  | 240.40   | 239.87  | 161.91 | 161.98 | 161.12 |
|            | 643.05  | 339.83   | 334.44  | 162.17 | 162.20 | 161.27 |
|            | 692.43  | 384.59   | 447.33  | 162.75 | 162.63 | 161.46 |
|            | 3528.02 | 3548.00  | 3516.22 | 163.36 | 162.95 | 162.09 |
| Nb/Cu(320) | 13.90   | -1776.56 | 13.30   | 164.00 | 163.87 | 162.67 |
|            | 16.31   | 15.34    | 17.06   | 164.85 | 164.75 | 163.39 |
|            | 17.93   | 16.56    | 17.26   | 167.99 | 167.70 | 163.55 |
|            | 23.75   | 23.78    | 22.91   | 168.35 | 168.08 | 166.78 |
|            | 25.76   | 25.84    | 25.23   | 169.10 | 168.94 | 167.70 |
|            | 26.38   | 26.16    | 25.48   | 170.44 | 170.45 | 168.55 |
|            | 30.65   | 30.84    | 27.22   | 171.11 | 171.09 | 169.92 |
|            | 35.31   | 35.16    | 30.57   | 171.43 | 171.35 | 170.38 |
|            | 36.51   | 36.55    | 33.84   | 171.86 | 171.54 | 170.61 |
|            | 37.88   | 37.61    | 34.82   | 173.56 | 172.15 | 171.15 |
|            | 41.99   | 44.98    | 36.30   | 174.37 | 174.17 | 171.37 |
|            | 46.41   | 48.24    | 37.32   | 174.64 | 174.55 | 173.57 |
|            | 48.09   | 49.88    | 48.36   | 174.78 | 174.85 | 173.90 |
|            | 49.98   | 53.95    | 48.95   | 175.88 | 175.54 | 173.98 |
|            | 53.87   | 54.12    | 49.89   | 176.82 | 176.52 | 175.09 |
|            | 54.22   | 54.76    | 53.65   | 177.09 | 176.97 | 175.74 |

---

|       |       |       |        |        |        |
|-------|-------|-------|--------|--------|--------|
| 54.69 | 55.04 | 53.95 | 177.32 | 177.26 | 176.67 |
| 55.28 | 57.08 | 54.67 | 178.19 | 178.37 | 176.88 |
| 56.85 | 57.44 | 55.02 | 180.93 | 180.80 | 177.86 |
| 57.39 | 58.20 | 57.02 | 181.09 | 181.04 | 179.73 |
| 58.47 | 58.88 | 57.32 | 182.68 | 182.43 | 180.53 |
| 59.19 | 61.70 | 58.27 | 183.43 | 183.38 | 181.80 |
| 61.58 | 62.77 | 59.12 | 184.29 | 184.08 | 182.60 |
| 62.69 | 63.28 | 61.88 | 184.89 | 184.85 | 183.65 |
| 63.29 | 63.60 | 62.24 | 185.20 | 185.19 | 184.43 |
| 63.52 | 64.05 | 63.18 | 186.16 | 185.91 | 184.53 |
| 64.15 | 64.31 | 63.87 | 187.50 | 187.29 | 185.61 |
| 64.91 | 64.87 | 63.87 | 187.68 | 187.55 | 186.83 |
| 65.08 | 65.59 | 64.38 | 189.15 | 188.92 | 186.94 |
| 65.71 | 66.83 | 65.16 | 191.25 | 191.18 | 188.60 |
| 67.02 | 67.80 | 65.55 | 192.20 | 192.19 | 190.59 |
| 67.89 | 68.32 | 66.92 | 192.55 | 192.53 | 191.09 |
| 68.41 | 69.57 | 67.85 | 193.54 | 193.17 | 192.10 |
| 69.67 | 70.04 | 68.51 | 194.87 | 194.78 | 192.81 |
| 69.93 | 70.64 | 69.43 | 196.78 | 196.88 | 194.11 |
| 70.76 | 71.15 | 70.05 | 198.23 | 197.89 | 196.21 |
| 71.40 | 71.53 | 70.73 | 198.53 | 198.57 | 197.11 |
| 71.65 | 74.51 | 71.03 | 199.77 | 200.02 | 197.87 |
| 74.78 | 74.79 | 71.46 | 201.19 | 200.87 | 199.34 |
| 75.60 | 75.59 | 74.80 | 202.04 | 202.01 | 200.52 |
| 78.00 | 78.13 | 75.40 | 202.66 | 202.44 | 201.24 |
| 79.33 | 79.80 | 78.28 | 203.34 | 202.81 | 201.60 |
| 80.13 | 81.24 | 79.28 | 203.76 | 203.63 | 202.06 |
| 80.98 | 81.48 | 80.45 | 204.20 | 203.93 | 203.11 |
| 85.85 | 86.26 | 81.21 | 204.74 | 204.47 | 203.40 |
| 87.06 | 87.64 | 86.47 | 205.87 | 205.50 | 203.93 |
| 88.40 | 88.45 | 87.84 | 206.94 | 206.69 | 204.97 |
| 89.82 | 89.89 | 89.60 | 207.45 | 207.25 | 206.02 |
| 90.58 | 90.90 | 89.95 | 208.06 | 208.06 | 206.74 |
| 90.77 | 91.17 | 90.75 | 209.15 | 209.06 | 207.16 |
| 91.07 | 91.71 | 91.11 | 211.26 | 211.06 | 208.37 |
| 91.53 | 92.06 | 91.42 | 212.67 | 212.47 | 210.69 |
| 92.13 | 92.24 | 91.68 | 212.75 | 212.75 | 211.75 |
| 93.86 | 93.92 | 92.37 | 213.10 | 212.96 | 212.02 |
| 94.24 | 94.50 | 93.91 | 214.63 | 214.29 | 212.47 |
| 94.93 | 94.80 | 94.26 | 214.95 | 214.65 | 213.78 |
| 95.44 | 95.56 | 94.85 | 215.32 | 215.30 | 214.21 |
| 95.97 | 96.22 | 95.14 | 215.48 | 215.42 | 214.50 |
| 96.82 | 96.50 | 95.69 | 215.76 | 215.59 | 214.71 |
| 97.09 | 97.81 | 96.59 | 216.43 | 216.22 | 215.15 |

---

---

|        |        |        |            |         |          |         |
|--------|--------|--------|------------|---------|----------|---------|
| 98.04  | 98.51  | 97.31  |            | 217.52  | 217.25   | 215.54  |
| 98.46  | 98.98  | 97.98  |            | 218.50  | 218.43   | 216.89  |
| 101.60 | 101.87 | 101.45 |            | 218.70  | 218.58   | 217.65  |
| 102.39 | 102.36 | 101.71 |            | 219.74  | 219.87   | 217.97  |
| 102.61 | 102.82 | 102.46 |            | 220.75  | 220.78   | 219.22  |
| 103.79 | 103.67 | 103.05 |            | 221.09  | 221.01   | 220.20  |
| 103.95 | 104.14 | 103.62 |            | 221.49  | 221.39   | 220.40  |
| 104.28 | 104.20 | 103.89 |            | 221.93  | 221.88   | 220.81  |
| 105.13 | 105.59 | 104.32 |            | 222.55  | 222.44   | 221.43  |
| 106.22 | 106.13 | 105.51 |            | 222.73  | 222.68   | 221.89  |
| 106.31 | 106.64 | 106.18 |            | 224.10  | 223.91   | 222.14  |
| 106.58 | 107.10 | 106.31 |            | 224.37  | 224.49   | 223.40  |
| 107.51 | 108.92 | 107.33 |            | 224.96  | 224.95   | 223.94  |
| 111.63 | 111.83 | 111.30 |            | 226.02  | 225.98   | 224.35  |
| 112.26 | 112.27 | 111.73 |            | 226.61  | 226.43   | 225.24  |
| 112.71 | 112.89 | 111.98 |            | 226.77  | 226.78   | 226.03  |
| 113.04 | 113.15 | 112.83 |            | 228.50  | 228.37   | 226.43  |
| 113.53 | 114.08 | 112.92 |            | 228.95  | 228.84   | 227.86  |
| 114.22 | 114.45 | 113.63 |            | 229.11  | 228.95   | 228.14  |
| 114.64 | 114.63 | 114.06 |            | 229.70  | 229.71   | 228.62  |
| 114.82 | 114.86 | 114.31 |            | 230.11  | 230.05   | 229.04  |
| 115.09 | 115.05 | 114.66 |            | 230.62  | 230.34   | 229.54  |
| 115.21 | 115.23 | 114.72 |            | 230.81  | 230.77   | 229.95  |
| 115.27 | 115.36 | 114.92 |            | 231.16  | 231.03   | 230.21  |
| 115.37 | 115.74 | 115.05 |            | 231.47  | 231.41   | 230.53  |
| 115.96 | 115.97 | 115.39 |            | 233.11  | 233.15   | 230.82  |
| 116.37 | 116.21 | 115.62 |            | 236.17  | 236.08   | 232.58  |
| 116.63 | 116.47 | 116.23 |            | 236.52  | 237.16   | 235.49  |
| 116.92 | 116.83 | 116.54 |            | 238.11  | 237.92   | 236.42  |
| 117.29 | 117.24 | 116.69 |            | 238.86  | 238.65   | 237.42  |
| 117.95 | 117.59 | 116.99 |            | 238.98  | 238.88   | 238.05  |
| 120.01 | 120.03 | 119.56 |            | 239.25  | 239.16   | 238.31  |
| 121.06 | 121.11 | 120.64 |            | 239.63  | 239.59   | 238.65  |
| 121.14 | 121.52 | 120.85 |            | 240.54  | 240.45   | 238.83  |
| 122.31 | 122.62 | 121.79 |            | 242.04  | 242.18   | 239.71  |
| 122.74 | 122.83 | 122.09 |            | 399.92  | 315.35   | 241.53  |
| 125.74 | 125.71 | 124.83 |            | 479.17  | 420.22   | 384.49  |
| 125.81 | 125.78 | 125.47 |            | 965.72  | 469.34   | 479.27  |
| 126.23 | 126.56 | 126.25 |            | 3559.09 | 3588.77  | 3534.32 |
| 127.14 | 127.03 | 126.63 | Ta/Cu(320) | 6.46    | -1497.68 | 15.91   |
| 127.53 | 127.40 | 127.13 |            | 18.48   | 8.46     | 18.03   |
| 128.03 | 128.00 | 127.67 |            | 19.83   | 19.32    | 18.34   |
| 128.47 | 128.37 | 128.03 |            | 23.97   | 24.02    | 24.69   |
| 128.81 | 128.51 | 128.20 |            | 25.27   | 25.27    | 26.94   |

---

---

|        |        |        |       |       |       |
|--------|--------|--------|-------|-------|-------|
| 130.05 | 129.75 | 129.53 | 27.32 | 26.75 | 27.22 |
| 130.82 | 130.92 | 130.29 | 27.85 | 28.06 | 27.65 |
| 131.66 | 131.37 | 131.23 | 30.72 | 30.77 | 30.75 |
| 132.46 | 132.59 | 132.29 | 33.01 | 33.16 | 33.23 |
| 133.56 | 133.08 | 132.88 | 34.34 | 34.08 | 34.29 |
| 136.83 | 137.02 | 136.59 | 38.59 | 36.96 | 38.73 |
| 137.56 | 137.50 | 137.16 | 44.99 | 45.27 | 45.42 |
| 138.10 | 138.07 | 137.59 | 45.66 | 45.92 | 48.92 |
| 138.61 | 138.18 | 137.72 | 48.82 | 49.47 | 52.02 |
| 138.96 | 138.98 | 138.60 | 50.47 | 52.33 | 52.06 |
| 140.08 | 139.98 | 139.68 | 52.42 | 53.56 | 53.82 |
| 141.71 | 141.72 | 141.34 | 53.64 | 54.35 | 55.42 |
| 142.02 | 141.88 | 141.50 | 55.66 | 56.59 | 57.81 |
| 142.90 | 142.84 | 141.67 | 56.72 | 57.80 | 59.01 |
| 144.61 | 144.63 | 142.76 | 58.83 | 59.10 | 59.58 |
| 145.82 | 145.64 | 144.09 | 59.56 | 59.65 | 59.83 |
| 146.96 | 146.88 | 145.27 | 59.76 | 59.87 | 59.85 |
| 147.45 | 147.43 | 146.60 | 60.34 | 60.99 | 60.95 |
| 148.14 | 148.05 | 147.05 | 61.15 | 61.24 | 61.23 |
| 148.57 | 148.57 | 147.80 | 61.41 | 61.50 | 61.52 |
| 148.80 | 148.84 | 147.97 | 63.35 | 63.55 | 63.27 |
| 149.56 | 149.29 | 148.23 | 65.43 | 65.65 | 65.21 |
| 150.36 | 150.35 | 148.79 | 66.31 | 67.02 | 66.93 |
| 150.99 | 150.73 | 150.05 | 67.04 | 67.39 | 67.51 |
| 151.28 | 151.33 | 150.42 | 67.57 | 68.46 | 67.68 |
| 153.11 | 153.02 | 150.67 | 68.52 | 68.88 | 68.44 |
| 154.08 | 154.04 | 152.44 | 69.67 | 69.57 | 69.42 |
| 154.43 | 154.41 | 153.46 | 69.80 | 69.85 | 69.83 |
| 154.67 | 154.80 | 153.70 | 70.44 | 70.89 | 70.25 |
| 156.54 | 156.50 | 153.85 | 70.76 | 71.05 | 71.05 |
| 158.21 | 158.02 | 156.52 | 71.10 | 71.65 | 71.43 |
| 158.69 | 158.34 | 156.62 | 74.28 | 74.44 | 73.73 |
| 160.16 | 160.24 | 157.48 | 74.36 | 74.60 | 74.11 |
| 160.94 | 161.04 | 159.80 | 76.39 | 76.86 | 76.95 |
| 161.36 | 161.46 | 160.71 | 77.73 | 78.20 | 77.79 |
| 161.74 | 161.83 | 160.88 | 78.47 | 78.47 | 78.70 |
| 161.98 | 161.91 | 161.35 | 79.94 | 80.16 | 79.54 |
| 162.06 | 162.21 | 161.40 | 81.49 | 81.45 | 80.24 |
| 163.10 | 162.76 | 161.44 | 81.52 | 81.85 | 81.59 |
| 163.78 | 163.85 | 162.28 | 84.93 | 85.63 | 83.09 |
| 164.44 | 164.43 | 163.43 | 85.54 | 86.54 | 87.00 |
| 166.36 | 165.42 | 163.64 | 89.25 | 89.36 | 88.58 |
| 168.43 | 168.25 | 165.60 | 89.45 | 89.64 | 89.27 |
| 168.70 | 168.58 | 167.88 | 90.11 | 90.20 | 90.02 |

---

---

|        |        |        |        |        |        |
|--------|--------|--------|--------|--------|--------|
| 169.32 | 169.33 | 168.11 | 90.56  | 90.45  | 90.07  |
| 170.82 | 170.76 | 168.79 | 90.89  | 90.97  | 90.57  |
| 171.32 | 171.36 | 170.22 | 91.36  | 91.30  | 90.96  |
| 171.75 | 171.58 | 170.77 | 92.55  | 92.72  | 91.77  |
| 172.06 | 171.84 | 171.08 | 93.67  | 93.78  | 92.46  |
| 174.16 | 174.14 | 171.70 | 94.07  | 94.08  | 93.84  |
| 174.36 | 174.32 | 173.24 | 95.33  | 95.18  | 94.07  |
| 174.74 | 174.40 | 173.76 | 95.71  | 95.76  | 95.07  |
| 175.25 | 175.26 | 173.82 | 97.26  | 96.93  | 95.55  |
| 176.11 | 176.03 | 174.53 | 97.46  | 97.24  | 96.79  |
| 176.92 | 176.92 | 175.38 | 99.57  | 98.00  | 97.23  |
| 177.50 | 177.26 | 176.56 | 100.41 | 100.64 | 99.51  |
| 178.75 | 178.71 | 176.91 | 101.75 | 101.10 | 100.50 |
| 179.42 | 179.15 | 178.34 | 101.88 | 101.85 | 101.08 |
| 181.06 | 180.98 | 178.58 | 102.86 | 102.41 | 101.87 |
| 181.82 | 181.77 | 180.51 | 103.81 | 103.35 | 102.76 |
| 183.44 | 183.41 | 181.19 | 104.67 | 104.33 | 103.48 |
| 184.41 | 184.46 | 182.87 | 105.98 | 106.27 | 105.51 |
| 184.79 | 184.81 | 183.77 | 106.71 | 106.56 | 106.25 |
| 185.33 | 185.28 | 184.31 | 107.44 | 106.95 | 106.45 |
| 186.28 | 185.78 | 184.60 | 107.61 | 107.50 | 107.17 |
| 187.50 | 187.32 | 184.97 | 109.23 | 108.20 | 107.64 |
| 187.63 | 187.54 | 186.72 | 109.46 | 109.19 | 108.44 |
| 188.50 | 188.40 | 187.09 | 109.52 | 109.42 | 109.13 |
| 190.60 | 190.05 | 187.96 | 111.21 | 110.33 | 109.31 |
| 192.19 | 192.13 | 189.44 | 111.48 | 111.15 | 109.70 |
| 192.50 | 192.43 | 191.76 | 112.45 | 111.38 | 110.41 |
| 193.32 | 193.75 | 191.99 | 112.94 | 112.81 | 110.77 |
| 194.42 | 194.14 | 192.64 | 114.84 | 112.99 | 112.30 |
| 194.95 | 194.80 | 193.59 | 115.54 | 115.18 | 112.79 |
| 197.92 | 197.74 | 194.49 | 116.36 | 115.72 | 114.99 |
| 198.30 | 198.25 | 196.73 | 117.04 | 116.58 | 115.60 |
| 199.37 | 199.46 | 197.66 | 117.27 | 117.14 | 116.33 |
| 200.55 | 200.78 | 198.66 | 117.53 | 117.27 | 116.81 |
| 202.05 | 201.93 | 200.31 | 118.10 | 117.72 | 116.93 |
| 202.58 | 202.52 | 201.17 | 118.18 | 118.12 | 117.23 |
| 203.04 | 202.65 | 201.33 | 118.89 | 118.26 | 117.65 |
| 203.32 | 203.13 | 201.81 | 119.04 | 118.77 | 117.95 |
| 203.99 | 203.83 | 202.06 | 119.33 | 119.06 | 118.22 |
| 204.80 | 204.45 | 203.18 | 120.05 | 119.33 | 118.71 |
| 205.37 | 205.07 | 203.92 | 120.67 | 120.12 | 118.94 |
| 206.85 | 206.66 | 204.10 | 121.89 | 120.51 | 119.56 |
| 207.30 | 207.06 | 205.81 | 122.04 | 121.89 | 120.35 |
| 208.11 | 207.82 | 206.18 | 123.14 | 122.02 | 121.54 |

---

---

|        |        |        |        |        |        |
|--------|--------|--------|--------|--------|--------|
| 208.90 | 208.60 | 207.16 | 123.75 | 123.16 | 121.85 |
| 209.61 | 209.25 | 207.90 | 124.09 | 123.57 | 122.67 |
| 212.04 | 212.00 | 208.33 | 124.85 | 124.15 | 122.85 |
| 212.54 | 212.34 | 211.34 | 124.98 | 124.77 | 123.86 |
| 212.72 | 212.52 | 211.71 | 125.20 | 124.87 | 124.00 |
| 213.47 | 213.22 | 211.91 | 126.03 | 124.99 | 124.17 |
| 214.23 | 213.89 | 212.61 | 126.60 | 125.98 | 124.68 |
| 214.94 | 214.80 | 213.11 | 127.23 | 126.59 | 125.74 |
| 215.34 | 214.95 | 213.98 | 127.78 | 127.25 | 126.44 |
| 215.63 | 215.44 | 214.38 | 128.44 | 127.84 | 126.98 |
| 216.06 | 215.76 | 214.95 | 128.91 | 128.49 | 127.51 |
| 216.39 | 216.17 | 215.24 | 131.13 | 128.91 | 128.10 |
| 217.67 | 217.52 | 215.57 | 131.55 | 130.67 | 128.63 |
| 218.30 | 217.96 | 216.83 | 133.49 | 131.37 | 130.73 |
| 218.84 | 218.62 | 217.42 | 134.34 | 133.61 | 130.85 |
| 220.15 | 220.39 | 218.06 | 135.52 | 134.50 | 133.38 |
| 220.74 | 220.80 | 219.85 | 135.86 | 135.43 | 134.63 |
| 221.54 | 221.49 | 220.37 | 138.52 | 135.85 | 135.00 |
| 221.74 | 221.69 | 221.00 | 139.31 | 138.48 | 135.54 |
| 221.85 | 221.91 | 221.21 | 140.99 | 139.51 | 138.34 |
| 222.66 | 222.62 | 221.42 | 141.13 | 140.75 | 139.06 |
| 222.97 | 222.89 | 222.16 | 142.24 | 141.27 | 140.39 |
| 224.42 | 224.37 | 222.46 | 142.70 | 142.11 | 140.73 |
| 224.79 | 224.67 | 223.80 | 143.65 | 142.56 | 141.77 |
| 225.66 | 225.49 | 224.13 | 143.93 | 143.66 | 142.22 |
| 226.23 | 226.14 | 224.90 | 144.45 | 143.84 | 143.38 |
| 226.43 | 226.60 | 225.42 | 144.64 | 144.46 | 143.45 |
| 227.26 | 227.28 | 226.20 | 144.96 | 144.72 | 144.17 |
| 228.83 | 228.47 | 226.94 | 145.40 | 144.89 | 144.40 |
| 229.25 | 229.30 | 228.14 | 145.73 | 145.42 | 144.72 |
| 229.52 | 229.41 | 228.70 | 146.66 | 145.80 | 145.41 |
| 230.08 | 229.91 | 228.89 | 146.89 | 146.57 | 145.61 |
| 230.44 | 230.06 | 229.49 | 148.66 | 146.94 | 146.14 |
| 230.60 | 230.58 | 229.68 | 148.97 | 148.68 | 146.89 |
| 231.28 | 230.95 | 230.09 | 149.22 | 148.99 | 148.67 |
| 232.46 | 232.11 | 230.67 | 149.93 | 149.50 | 148.98 |
| 232.52 | 232.32 | 231.33 | 151.36 | 150.05 | 149.43 |
| 233.24 | 233.44 | 231.48 | 151.49 | 151.40 | 149.77 |
| 237.74 | 237.67 | 233.00 | 152.17 | 152.03 | 151.27 |
| 238.34 | 238.27 | 237.09 | 153.12 | 152.31 | 151.65 |
| 238.70 | 238.64 | 237.67 | 154.80 | 153.75 | 152.16 |
| 238.98 | 238.87 | 238.15 | 157.01 | 154.89 | 153.37 |
| 239.37 | 239.19 | 238.25 | 157.92 | 157.46 | 154.59 |
| 239.44 | 239.43 | 238.67 | 158.56 | 158.16 | 157.01 |

---

|           |         |          |         |        |        |        |
|-----------|---------|----------|---------|--------|--------|--------|
|           | 240.38  | 240.08   | 238.92  | 158.88 | 158.71 | 157.66 |
|           | 241.07  | 241.09   | 239.51  | 159.74 | 159.51 | 158.28 |
|           | 243.09  | 243.00   | 240.16  | 160.44 | 159.90 | 159.46 |
|           | 418.97  | 271.05   | 242.49  | 160.75 | 160.58 | 159.72 |
|           | 502.89  | 404.08   | 349.50  | 161.68 | 160.85 | 160.44 |
|           | 887.56  | 421.21   | 469.44  | 162.11 | 161.69 | 160.58 |
|           | 3563.94 | 3592.71  | 3523.10 | 163.13 | 162.30 | 161.42 |
| W/Cu(320) | 6.60    | -1358.43 | 6.93    | 164.49 | 163.19 | 162.14 |
|           | 10.23   | 7.97     | 9.70    | 165.64 | 164.31 | 163.02 |
|           | 10.40   | 12.52    | 11.70   | 168.59 | 168.48 | 164.50 |
|           | 20.38   | 28.05    | 27.23   | 169.19 | 169.01 | 168.01 |
|           | 27.65   | 28.48    | 27.62   | 169.76 | 169.71 | 168.91 |
|           | 28.26   | 30.92    | 28.27   | 171.49 | 171.30 | 169.78 |
|           | 31.53   | 30.88    | 31.52   | 171.97 | 171.86 | 171.08 |
|           | 33.32   | 31.79    | 37.02   | 172.49 | 172.23 | 171.62 |
|           | 37.01   | 36.83    | 38.72   | 173.60 | 173.27 | 171.94 |
|           | 40.45   | 40.47    | 39.92   | 173.78 | 173.63 | 173.02 |
|           | 40.88   | 40.88    | 40.54   | 173.98 | 173.84 | 173.24 |
|           | 44.17   | 45.71    | 44.97   | 174.22 | 173.99 | 173.52 |
|           | 49.44   | 49.30    | 47.34   | 174.81 | 174.25 | 173.75 |
|           | 52.27   | 52.37    | 52.17   | 175.82 | 175.57 | 173.99 |
|           | 56.88   | 56.86    | 53.79   | 176.43 | 175.85 | 175.29 |
|           | 57.92   | 57.66    | 57.09   | 177.58 | 177.37 | 175.68 |
|           | 58.20   | 58.29    | 57.92   | 178.70 | 178.66 | 177.28 |
|           | 59.81   | 59.98    | 58.42   | 179.07 | 178.92 | 178.47 |
|           | 61.28   | 61.35    | 59.72   | 180.94 | 180.75 | 178.65 |
|           | 61.71   | 61.64    | 60.69   | 181.28 | 181.25 | 180.49 |
|           | 62.15   | 63.29    | 61.39   | 182.29 | 181.90 | 180.91 |
|           | 63.41   | 63.63    | 63.25   | 183.02 | 183.06 | 181.65 |
|           | 63.49   | 63.85    | 63.38   | 183.30 | 183.28 | 182.59 |
|           | 63.77   | 64.09    | 63.49   | 184.43 | 184.26 | 182.82 |
|           | 64.18   | 64.24    | 63.90   | 185.95 | 185.01 | 183.72 |
|           | 64.52   | 66.46    | 64.23   | 187.90 | 187.74 | 184.52 |
|           | 66.38   | 66.81    | 64.52   | 188.28 | 188.30 | 187.43 |
|           | 67.23   | 67.32    | 66.54   | 188.59 | 188.43 | 187.97 |
|           | 67.39   | 67.79    | 66.82   | 189.16 | 188.83 | 188.14 |
|           | 67.67   | 68.13    | 67.09   | 189.18 | 189.21 | 188.68 |
|           | 68.09   | 69.33    | 67.68   | 190.67 | 190.16 | 189.14 |
|           | 69.30   | 69.79    | 67.93   | 190.94 | 191.17 | 190.15 |
|           | 70.45   | 70.91    | 69.10   | 192.90 | 192.75 | 190.35 |
|           | 71.36   | 71.98    | 70.00   | 193.27 | 193.20 | 192.78 |
|           | 72.03   | 72.19    | 71.19   | 195.61 | 195.72 | 193.22 |
|           | 72.20   | 72.99    | 72.18   | 196.76 | 196.96 | 195.33 |
|           | 73.05   | 74.98    | 72.80   | 197.74 | 197.91 | 196.05 |



---

|        |        |        |        |        |        |
|--------|--------|--------|--------|--------|--------|
| 75.04  | 76.33  | 73.30  | 199.13 | 199.00 | 197.85 |
| 76.05  | 77.21  | 75.17  | 199.32 | 199.11 | 198.59 |
| 77.20  | 77.44  | 75.92  | 199.81 | 199.80 | 198.79 |
| 77.57  | 79.77  | 76.93  | 200.20 | 200.03 | 199.36 |
| 80.61  | 80.97  | 77.30  | 201.36 | 201.19 | 199.44 |
| 81.48  | 82.37  | 80.47  | 201.87 | 201.65 | 200.87 |
| 83.13  | 83.52  | 81.41  | 203.58 | 203.43 | 201.45 |
| 83.62  | 85.09  | 82.82  | 203.89 | 203.88 | 203.28 |
| 85.41  | 88.54  | 83.32  | 206.30 | 206.43 | 203.53 |
| 88.19  | 89.11  | 87.27  | 206.55 | 206.53 | 205.96 |
| 89.53  | 90.11  | 88.02  | 207.09 | 206.95 | 206.24 |
| 90.11  | 90.84  | 89.45  | 208.00 | 207.96 | 206.62 |
| 90.68  | 91.46  | 90.32  | 208.83 | 208.83 | 207.38 |
| 91.43  | 92.09  | 90.71  | 210.93 | 210.93 | 208.70 |
| 92.20  | 92.56  | 91.39  | 211.35 | 211.32 | 210.49 |
| 93.30  | 93.24  | 92.29  | 212.26 | 212.10 | 210.95 |
| 93.83  | 94.52  | 92.93  | 212.53 | 212.30 | 211.64 |
| 94.27  | 94.68  | 93.84  | 213.32 | 213.32 | 211.86 |
| 94.66  | 95.83  | 94.42  | 214.38 | 214.25 | 212.97 |
| 97.83  | 98.34  | 94.76  | 215.00 | 215.09 | 213.78 |
| 98.54  | 99.01  | 97.57  | 215.55 | 215.48 | 214.80 |
| 99.20  | 99.49  | 98.32  | 215.77 | 215.66 | 215.10 |
| 99.46  | 99.72  | 98.67  | 216.09 | 216.15 | 215.41 |
| 100.12 | 100.27 | 99.56  | 216.71 | 216.54 | 215.62 |
| 101.04 | 100.99 | 100.16 | 216.98 | 216.81 | 216.09 |
| 101.77 | 101.90 | 100.40 | 217.06 | 216.84 | 216.20 |
| 101.96 | 102.19 | 101.44 | 219.66 | 219.50 | 216.49 |
| 103.31 | 103.36 | 102.10 | 220.02 | 219.96 | 219.09 |
| 103.84 | 104.39 | 102.92 | 220.38 | 220.56 | 219.64 |
| 104.51 | 104.44 | 103.63 | 220.52 | 220.60 | 220.15 |
| 105.68 | 105.52 | 104.24 | 221.23 | 221.20 | 220.36 |
| 106.59 | 106.59 | 105.38 | 222.01 | 221.70 | 220.87 |
| 107.00 | 107.01 | 106.46 | 222.34 | 222.48 | 221.43 |
| 108.97 | 109.03 | 106.70 | 224.26 | 224.23 | 222.20 |
| 109.57 | 109.54 | 108.90 | 224.89 | 224.61 | 223.96 |
| 109.87 | 109.69 | 109.46 | 226.31 | 226.07 | 224.32 |
| 111.79 | 112.24 | 109.64 | 226.77 | 226.69 | 225.49 |
| 113.17 | 113.05 | 111.88 | 227.15 | 227.23 | 226.28 |
| 114.02 | 114.31 | 112.95 | 227.35 | 227.42 | 227.05 |
| 114.52 | 114.65 | 114.26 | 228.28 | 228.13 | 227.21 |
| 114.80 | 114.89 | 114.51 | 229.81 | 229.97 | 228.02 |
| 116.61 | 116.64 | 114.79 | 229.94 | 230.02 | 229.47 |
| 116.91 | 116.91 | 116.37 | 230.44 | 230.38 | 229.72 |
| 117.83 | 118.18 | 116.44 | 231.09 | 231.05 | 229.97 |

---

---

|        |        |        |           |         |          |         |
|--------|--------|--------|-----------|---------|----------|---------|
| 118.13 | 118.29 | 117.49 |           | 231.85  | 231.72   | 230.90  |
| 118.40 | 118.61 | 118.11 |           | 232.52  | 232.45   | 231.59  |
| 118.90 | 118.97 | 118.25 |           | 232.68  | 232.50   | 232.20  |
| 119.17 | 118.99 | 118.56 |           | 233.28  | 233.16   | 232.32  |
| 119.36 | 119.55 | 118.79 |           | 233.65  | 233.53   | 233.06  |
| 120.03 | 120.04 | 119.00 |           | 236.25  | 236.18   | 233.51  |
| 120.53 | 120.70 | 119.83 |           | 236.45  | 236.35   | 235.58  |
| 120.89 | 120.95 | 119.93 |           | 237.05  | 236.94   | 235.79  |
| 121.24 | 121.28 | 120.70 |           | 237.59  | 237.54   | 236.47  |
| 121.43 | 121.44 | 121.02 |           | 237.88  | 238.26   | 237.07  |
| 121.74 | 121.55 | 121.22 |           | 238.52  | 238.55   | 237.86  |
| 123.65 | 123.59 | 121.59 |           | 238.89  | 238.82   | 238.47  |
| 124.20 | 124.22 | 122.99 |           | 239.52  | 240.08   | 238.63  |
| 124.90 | 124.70 | 123.62 |           | 240.60  | 241.16   | 240.03  |
| 125.28 | 125.12 | 124.35 |           | 463.96  | 256.21   | 241.38  |
| 126.54 | 126.58 | 124.78 |           | 512.67  | 413.76   | 348.97  |
| 127.15 | 127.43 | 126.55 |           | 903.69  | 473.10   | 483.27  |
| 128.04 | 128.24 | 127.18 |           | 3602.68 | 3591.97  | 3510.19 |
| 128.63 | 128.61 | 127.81 | V/Cu(553) | 11.51   | -2266.13 | 11.35   |
| 128.88 | 129.05 | 128.44 |           | 21.96   | 11.43    | 21.84   |
| 130.05 | 130.08 | 128.77 |           | 31.83   | 22.16    | 26.93   |
| 130.55 | 130.22 | 129.76 |           | 38.05   | 27.41    | 31.89   |
| 131.35 | 130.88 | 130.27 |           | 42.67   | 31.84    | 38.47   |
| 132.56 | 132.51 | 131.02 |           | 44.80   | 38.34    | 43.21   |
| 133.44 | 133.47 | 132.55 |           | 52.43   | 42.82    | 45.30   |
| 133.93 | 133.53 | 133.12 |           | 53.75   | 45.02    | 51.49   |
| 136.07 | 135.97 | 133.25 |           | 54.05   | 52.54    | 52.94   |
| 136.48 | 136.62 | 135.81 |           | 58.89   | 53.81    | 53.83   |
| 139.32 | 139.03 | 136.32 |           | 59.76   | 53.86    | 57.11   |
| 139.62 | 139.57 | 138.99 |           | 60.47   | 59.04    | 59.22   |
| 140.36 | 140.37 | 139.47 |           | 63.14   | 59.73    | 59.91   |
| 141.11 | 141.07 | 140.33 |           | 65.16   | 60.27    | 62.83   |
| 141.34 | 141.19 | 140.95 |           | 67.23   | 63.09    | 64.85   |
| 142.20 | 141.93 | 141.27 |           | 67.49   | 65.09    | 65.24   |
| 144.15 | 143.99 | 142.14 |           | 67.77   | 66.49    | 67.38   |
| 145.42 | 145.74 | 143.42 |           | 69.85   | 67.22    | 67.83   |
| 146.86 | 147.06 | 145.45 |           | 70.01   | 67.41    | 68.90   |
| 147.18 | 147.15 | 146.71 |           | 70.10   | 67.98    | 69.80   |
| 147.83 | 147.43 | 146.86 |           | 70.41   | 69.75    | 70.12   |
| 148.52 | 148.69 | 147.42 |           | 71.06   | 70.08    | 70.26   |
| 149.02 | 149.11 | 148.51 |           | 73.04   | 70.33    | 70.77   |
| 149.36 | 149.35 | 149.10 |           | 76.48   | 70.39    | 71.21   |
| 149.57 | 149.66 | 149.15 |           | 76.86   | 71.14    | 73.24   |
| 150.33 | 150.17 | 149.37 |           | 77.47   | 73.18    | 76.69   |

---

---

|        |        |        |        |        |        |
|--------|--------|--------|--------|--------|--------|
| 151.27 | 151.06 | 150.16 | 77.49  | 76.49  | 76.72  |
| 151.78 | 151.88 | 151.01 | 78.01  | 76.76  | 76.98  |
| 152.55 | 152.14 | 151.75 | 79.48  | 77.36  | 77.52  |
| 153.85 | 153.82 | 152.13 | 82.28  | 77.68  | 77.63  |
| 155.18 | 154.88 | 153.83 | 82.45  | 77.83  | 79.57  |
| 155.22 | 155.43 | 154.76 | 84.44  | 79.55  | 82.15  |
| 156.05 | 156.25 | 155.18 | 84.66  | 82.24  | 82.61  |
| 157.10 | 157.23 | 155.79 | 85.44  | 82.53  | 84.38  |
| 157.54 | 157.69 | 157.06 | 85.64  | 84.39  | 84.56  |
| 158.35 | 158.38 | 157.35 | 86.34  | 84.60  | 85.83  |
| 161.21 | 161.50 | 158.50 | 86.49  | 85.54  | 86.37  |
| 161.81 | 161.67 | 161.20 | 87.43  | 86.37  | 86.45  |
| 162.34 | 162.37 | 161.36 | 90.24  | 86.51  | 87.48  |
| 162.60 | 162.71 | 162.00 | 92.54  | 87.45  | 90.66  |
| 162.89 | 162.86 | 162.23 | 93.14  | 90.60  | 92.73  |
| 163.31 | 163.17 | 162.56 | 94.19  | 92.77  | 93.00  |
| 163.44 | 163.46 | 162.84 | 94.64  | 93.02  | 94.46  |
| 164.15 | 164.39 | 162.95 | 94.89  | 94.31  | 94.58  |
| 165.04 | 164.90 | 163.79 | 95.37  | 94.64  | 94.83  |
| 166.72 | 165.87 | 164.92 | 95.42  | 95.08  | 95.08  |
| 166.86 | 166.82 | 166.05 | 96.69  | 95.49  | 95.94  |
| 169.06 | 169.10 | 166.75 | 97.06  | 95.52  | 96.75  |
| 169.67 | 169.68 | 168.84 | 97.17  | 96.55  | 96.84  |
| 171.76 | 171.84 | 169.41 | 98.35  | 96.82  | 97.00  |
| 173.28 | 173.40 | 171.35 | 98.37  | 97.17  | 98.82  |
| 173.80 | 173.73 | 173.01 | 99.16  | 98.46  | 99.11  |
| 174.51 | 174.51 | 173.55 | 99.78  | 98.53  | 99.41  |
| 175.28 | 174.92 | 174.34 | 99.86  | 99.27  | 100.08 |
| 176.51 | 176.41 | 174.87 | 100.72 | 99.86  | 100.23 |
| 176.63 | 176.69 | 176.22 | 100.78 | 100.01 | 100.42 |
| 177.75 | 177.95 | 176.50 | 100.94 | 100.68 | 100.77 |
| 178.20 | 178.15 | 177.55 | 101.21 | 100.80 | 100.84 |
| 178.51 | 178.37 | 177.86 | 101.45 | 100.88 | 101.17 |
| 178.92 | 178.90 | 178.06 | 101.67 | 101.06 | 101.32 |
| 179.27 | 179.52 | 178.78 | 101.73 | 101.60 | 101.80 |
| 181.41 | 181.71 | 179.07 | 102.26 | 101.71 | 101.84 |
| 181.99 | 181.98 | 181.52 | 102.43 | 101.85 | 102.28 |
| 182.14 | 182.31 | 181.79 | 102.72 | 102.20 | 102.64 |
| 182.67 | 182.78 | 181.83 | 102.94 | 102.77 | 102.81 |
| 182.98 | 183.34 | 182.38 | 103.66 | 102.86 | 103.52 |
| 185.90 | 185.89 | 183.12 | 106.16 | 103.33 | 104.24 |
| 186.87 | 186.85 | 185.61 | 106.33 | 103.53 | 105.97 |
| 187.66 | 187.46 | 186.59 | 106.46 | 106.11 | 106.62 |
| 188.40 | 188.21 | 187.03 | 107.11 | 106.35 | 106.86 |

---

---

|        |        |        |        |        |        |
|--------|--------|--------|--------|--------|--------|
| 189.71 | 189.58 | 187.70 | 108.03 | 106.58 | 107.36 |
| 189.77 | 189.73 | 189.23 | 108.07 | 107.19 | 107.84 |
| 190.70 | 190.71 | 189.43 | 108.65 | 107.22 | 108.13 |
| 191.10 | 191.09 | 190.50 | 109.18 | 108.49 | 108.45 |
| 192.08 | 192.28 | 190.73 | 110.68 | 109.58 | 110.15 |
| 193.26 | 193.30 | 191.75 | 110.87 | 110.40 | 110.69 |
| 194.48 | 194.31 | 193.22 | 111.44 | 110.86 | 111.19 |
| 196.58 | 196.50 | 193.96 | 111.80 | 111.52 | 111.71 |
| 197.04 | 196.91 | 196.36 | 112.99 | 111.66 | 111.92 |
| 197.56 | 197.66 | 196.99 | 113.31 | 112.74 | 112.57 |
| 199.74 | 199.59 | 197.26 | 113.45 | 113.29 | 113.38 |
| 200.08 | 199.98 | 199.27 | 113.90 | 113.41 | 113.67 |
| 200.84 | 201.14 | 199.65 | 114.14 | 113.55 | 113.78 |
| 203.28 | 203.31 | 200.83 | 114.23 | 114.28 | 114.48 |
| 204.42 | 204.39 | 202.99 | 115.05 | 114.65 | 114.63 |
| 204.52 | 204.41 | 203.79 | 115.37 | 114.73 | 115.14 |
| 205.52 | 205.23 | 203.89 | 115.49 | 115.45 | 115.41 |
| 206.02 | 206.05 | 204.95 | 116.17 | 115.54 | 115.77 |
| 206.69 | 206.67 | 205.76 | 116.53 | 115.98 | 115.96 |
| 207.02 | 207.09 | 206.19 | 117.06 | 116.19 | 116.39 |
| 208.38 | 208.10 | 206.58 | 117.76 | 116.79 | 116.93 |
| 208.79 | 208.53 | 207.77 | 118.03 | 117.51 | 117.66 |
| 209.19 | 208.97 | 208.09 | 119.18 | 117.98 | 117.98 |
| 209.58 | 209.56 | 208.80 | 119.44 | 119.06 | 118.80 |
| 211.05 | 210.86 | 209.19 | 119.53 | 119.43 | 119.18 |
| 213.44 | 213.45 | 210.73 | 120.19 | 119.51 | 119.58 |
| 213.89 | 213.65 | 213.15 | 121.30 | 119.88 | 120.74 |
| 214.11 | 213.92 | 213.41 | 121.46 | 121.24 | 121.16 |
| 214.65 | 214.66 | 213.77 | 121.76 | 121.46 | 121.52 |
| 216.01 | 215.86 | 214.39 | 122.03 | 121.72 | 121.83 |
| 216.43 | 216.51 | 215.38 | 122.21 | 121.89 | 121.96 |
| 216.97 | 216.85 | 216.21 | 122.73 | 122.18 | 122.20 |
| 217.40 | 217.42 | 216.67 | 122.86 | 122.59 | 122.62 |
| 217.78 | 217.54 | 217.12 | 123.20 | 122.78 | 123.01 |
| 218.33 | 218.08 | 217.24 | 123.42 | 123.15 | 123.11 |
| 218.60 | 218.50 | 217.72 | 123.56 | 123.33 | 123.29 |
| 219.03 | 218.96 | 218.36 | 123.88 | 123.51 | 123.58 |
| 219.65 | 219.71 | 218.54 | 123.94 | 123.77 | 123.76 |
| 220.85 | 221.01 | 219.54 | 124.33 | 123.98 | 123.93 |
| 221.84 | 221.92 | 220.85 | 124.72 | 124.07 | 124.03 |
| 222.28 | 222.16 | 221.72 | 125.50 | 124.51 | 124.56 |
| 222.40 | 222.66 | 221.91 | 125.66 | 125.29 | 125.40 |
| 222.98 | 223.09 | 222.48 | 125.95 | 125.57 | 125.64 |
| 224.22 | 224.24 | 222.89 | 127.16 | 126.16 | 126.32 |

---

|            |         |          |         |        |        |        |
|------------|---------|----------|---------|--------|--------|--------|
|            | 224.51  | 224.43   | 223.87  | 127.98 | 127.58 | 127.87 |
|            | 226.40  | 226.24   | 224.09  | 128.14 | 127.82 | 127.92 |
|            | 226.56  | 226.92   | 226.05  | 128.75 | 128.10 | 128.27 |
|            | 227.11  | 227.20   | 226.64  | 128.95 | 128.31 | 128.38 |
|            | 227.28  | 227.61   | 226.78  | 129.70 | 128.85 | 128.98 |
|            | 227.85  | 227.67   | 227.22  | 129.97 | 129.71 | 129.56 |
|            | 229.33  | 229.40   | 227.66  | 130.54 | 130.01 | 129.72 |
|            | 229.58  | 229.69   | 228.86  | 130.89 | 130.31 | 130.61 |
|            | 229.84  | 230.00   | 229.46  | 131.27 | 130.66 | 130.88 |
|            | 230.30  | 230.35   | 229.84  | 131.91 | 131.01 | 130.99 |
|            | 230.78  | 230.86   | 230.04  | 133.29 | 131.58 | 132.32 |
|            | 231.01  | 230.90   | 230.58  | 134.18 | 133.19 | 133.37 |
|            | 231.50  | 231.64   | 230.68  | 134.66 | 134.17 | 134.13 |
|            | 231.79  | 231.90   | 231.12  | 134.87 | 134.42 | 134.61 |
|            | 232.25  | 232.18   | 231.76  | 134.95 | 134.83 | 134.83 |
|            | 233.12  | 233.40   | 232.13  | 135.01 | 134.96 | 134.98 |
|            | 233.50  | 233.70   | 233.02  | 135.46 | 135.00 | 135.25 |
|            | 237.88  | 237.90   | 233.61  | 135.60 | 135.39 | 135.59 |
|            | 238.11  | 238.01   | 237.44  | 136.03 | 135.63 | 135.87 |
|            | 239.11  | 239.24   | 237.65  | 136.46 | 135.78 | 136.02 |
|            | 239.24  | 239.44   | 238.75  | 136.92 | 136.22 | 136.27 |
|            | 239.76  | 239.76   | 238.79  | 137.32 | 137.08 | 137.37 |
|            | 239.98  | 239.97   | 239.40  | 138.47 | 137.75 | 137.61 |
|            | 240.41  | 240.50   | 239.82  | 138.84 | 138.50 | 138.51 |
|            | 242.17  | 243.01   | 240.29  | 139.12 | 138.72 | 138.74 |
|            | 243.89  | 245.21   | 243.74  | 139.59 | 139.13 | 139.16 |
|            | 450.08  | 280.62   | 245.58  | 139.71 | 139.40 | 139.34 |
|            | 508.33  | 439.23   | 360.75  | 140.80 | 139.77 | 139.84 |
|            | 932.76  | 513.95   | 511.57  | 140.94 | 140.65 | 140.60 |
|            | 3610.11 | 3591.73  | 3516.81 | 141.47 | 140.87 | 140.85 |
| Cu/Cu(553) | 11.42   | -1271.07 | 11.16   | 141.66 | 141.21 | 141.00 |
|            | 23.15   | 11.07    | 23.34   | 142.31 | 141.63 | 141.35 |
|            | 30.85   | 24.67    | 31.10   | 143.25 | 142.29 | 142.18 |
|            | 38.93   | 30.33    | 36.10   | 143.47 | 143.24 | 143.23 |
|            | 43.31   | 32.83    | 38.87   | 144.98 | 143.32 | 143.34 |
|            | 46.51   | 39.22    | 43.88   | 145.32 | 144.93 | 144.74 |
|            | 47.45   | 43.78    | 46.18   | 145.65 | 145.32 | 145.51 |
|            | 51.87   | 47.12    | 47.62   | 146.02 | 145.42 | 145.57 |
|            | 52.14   | 47.78    | 51.60   | 146.03 | 145.76 | 145.71 |
|            | 55.09   | 52.16    | 52.30   | 146.21 | 146.08 | 145.85 |
|            | 57.77   | 52.53    | 55.24   | 146.57 | 146.10 | 146.10 |
|            | 58.22   | 56.24    | 57.99   | 147.04 | 146.40 | 146.14 |
|            | 63.65   | 58.24    | 58.34   | 147.28 | 146.89 | 146.72 |
|            | 65.05   | 58.64    | 64.02   | 147.36 | 147.28 | 147.00 |

---

|        |       |       |        |        |        |
|--------|-------|-------|--------|--------|--------|
| 65.14  | 64.48 | 65.07 | 147.70 | 147.36 | 147.30 |
| 65.41  | 65.19 | 65.13 | 147.86 | 147.52 | 147.42 |
| 67.61  | 65.50 | 65.41 | 148.01 | 147.85 | 147.81 |
| 68.12  | 65.65 | 67.91 | 148.47 | 148.00 | 148.03 |
| 68.75  | 68.15 | 68.58 | 148.58 | 148.49 | 148.50 |
| 69.44  | 69.15 | 69.26 | 148.95 | 148.69 | 148.54 |
| 69.60  | 69.22 | 69.67 | 149.31 | 149.03 | 148.96 |
| 70.12  | 70.08 | 69.98 | 149.55 | 149.27 | 149.11 |
| 71.38  | 70.13 | 70.27 | 149.87 | 149.44 | 149.60 |
| 72.68  | 70.54 | 71.53 | 150.00 | 149.86 | 149.76 |
| 75.00  | 71.52 | 73.17 | 150.65 | 149.96 | 150.05 |
| 75.68  | 73.52 | 75.54 | 151.00 | 150.61 | 150.41 |
| 75.94  | 76.16 | 75.96 | 151.57 | 150.85 | 150.82 |
| 76.13  | 76.21 | 76.19 | 151.98 | 151.41 | 151.49 |
| 79.65  | 76.34 | 76.46 | 152.21 | 151.86 | 151.86 |
| 80.73  | 76.36 | 79.91 | 152.34 | 152.11 | 151.99 |
| 81.24  | 80.17 | 80.65 | 152.65 | 152.38 | 152.25 |
| 82.78  | 81.73 | 81.76 | 152.95 | 152.59 | 152.48 |
| 83.98  | 81.97 | 82.72 | 152.99 | 152.86 | 152.76 |
| 84.24  | 84.39 | 84.46 | 153.68 | 153.19 | 153.01 |
| 85.63  | 84.54 | 84.47 | 153.98 | 153.61 | 153.53 |
| 85.94  | 84.65 | 85.82 | 155.31 | 153.83 | 153.82 |
| 86.05  | 86.77 | 86.56 | 156.04 | 155.04 | 155.63 |
| 90.68  | 86.90 | 87.18 | 156.81 | 155.62 | 155.72 |
| 90.96  | 87.00 | 89.34 | 156.95 | 156.58 | 156.72 |
| 91.88  | 91.47 | 90.84 | 157.39 | 157.02 | 156.96 |
| 92.74  | 92.55 | 92.54 | 157.54 | 157.48 | 157.10 |
| 93.56  | 92.60 | 92.87 | 157.72 | 157.59 | 157.45 |
| 93.81  | 93.65 | 93.96 | 158.06 | 157.73 | 157.80 |
| 94.28  | 94.26 | 94.18 | 158.59 | 158.15 | 158.03 |
| 94.76  | 94.39 | 94.28 | 158.89 | 158.54 | 158.56 |
| 95.42  | 94.85 | 94.89 | 159.43 | 158.72 | 158.84 |
| 95.66  | 94.92 | 95.11 | 159.59 | 159.39 | 159.38 |
| 96.06  | 95.15 | 95.43 | 160.03 | 159.71 | 159.66 |
| 96.25  | 95.68 | 95.78 | 160.26 | 160.07 | 159.98 |
| 96.81  | 96.70 | 96.41 | 160.59 | 160.27 | 160.18 |
| 97.04  | 97.11 | 96.96 | 160.74 | 160.49 | 160.24 |
| 97.43  | 97.23 | 97.98 | 161.01 | 160.75 | 160.70 |
| 98.81  | 97.99 | 98.05 | 161.36 | 160.93 | 160.89 |
| 98.96  | 98.54 | 98.49 | 161.51 | 161.27 | 161.41 |
| 99.07  | 99.27 | 99.18 | 162.01 | 161.66 | 161.96 |
| 99.74  | 99.38 | 99.36 | 162.34 | 161.99 | 162.26 |
| 99.92  | 99.47 | 99.55 | 163.21 | 162.23 | 162.29 |
| 100.12 | 99.72 | 99.79 | 163.56 | 163.09 | 162.95 |

---

---

|        |        |        |        |        |        |
|--------|--------|--------|--------|--------|--------|
| 100.22 | 99.85  | 100.09 | 164.56 | 163.49 | 163.51 |
| 100.54 | 100.04 | 100.49 | 164.74 | 164.44 | 164.42 |
| 101.31 | 100.88 | 100.79 | 165.18 | 164.66 | 164.59 |
| 101.58 | 101.02 | 101.41 | 165.89 | 164.95 | 164.88 |
| 101.65 | 101.68 | 101.61 | 166.17 | 165.86 | 165.71 |
| 102.06 | 101.84 | 101.80 | 166.39 | 166.16 | 165.94 |
| 102.37 | 102.22 | 102.61 | 166.45 | 166.42 | 166.45 |
| 105.33 | 102.40 | 102.76 | 167.11 | 166.52 | 166.46 |
| 106.83 | 102.87 | 103.66 | 167.35 | 167.17 | 167.05 |
| 107.01 | 106.27 | 105.59 | 167.78 | 167.28 | 167.33 |
| 107.30 | 107.51 | 107.34 | 169.25 | 167.71 | 167.72 |
| 107.41 | 107.60 | 107.46 | 169.50 | 169.24 | 169.23 |
| 107.93 | 107.69 | 107.59 | 169.98 | 169.52 | 169.67 |
| 108.44 | 108.19 | 108.16 | 170.86 | 169.94 | 169.83 |
| 108.50 | 108.66 | 108.42 | 172.14 | 170.75 | 170.74 |
| 109.40 | 109.10 | 109.04 | 173.00 | 172.10 | 172.08 |
| 109.45 | 109.21 | 109.14 | 173.56 | 172.75 | 172.96 |
| 109.68 | 109.43 | 109.74 | 173.82 | 173.58 | 173.54 |
| 110.62 | 109.90 | 109.89 | 175.30 | 173.87 | 173.80 |
| 111.07 | 110.21 | 110.34 | 175.57 | 174.97 | 174.94 |
| 112.21 | 110.76 | 110.98 | 176.56 | 175.63 | 175.63 |
| 112.81 | 111.10 | 111.14 | 176.99 | 176.43 | 176.33 |
| 113.18 | 113.23 | 113.40 | 177.36 | 176.95 | 176.88 |
| 113.69 | 113.51 | 113.63 | 177.78 | 177.33 | 177.19 |
| 113.82 | 113.78 | 113.96 | 178.54 | 177.63 | 177.44 |
| 113.91 | 114.01 | 114.12 | 180.11 | 178.41 | 178.40 |
| 114.16 | 114.46 | 114.22 | 180.58 | 179.96 | 179.78 |
| 114.24 | 114.57 | 114.31 | 182.52 | 180.39 | 180.41 |
| 114.49 | 114.63 | 114.36 | 183.50 | 182.33 | 182.40 |
| 114.76 | 114.81 | 114.57 | 183.53 | 183.26 | 183.09 |
| 115.79 | 114.96 | 114.92 | 183.87 | 183.41 | 183.33 |
| 117.01 | 115.28 | 115.04 | 184.69 | 183.72 | 183.86 |
| 117.23 | 115.44 | 116.12 | 184.89 | 184.36 | 184.13 |
| 117.44 | 117.68 | 117.45 | 185.09 | 184.71 | 184.68 |
| 117.78 | 117.73 | 117.56 | 185.48 | 185.13 | 184.97 |
| 118.08 | 117.75 | 117.67 | 185.61 | 185.36 | 185.19 |
| 118.34 | 118.02 | 117.83 | 188.06 | 185.41 | 185.32 |
| 118.75 | 119.05 | 118.49 | 188.33 | 187.89 | 187.55 |
| 119.49 | 119.49 | 119.25 | 189.00 | 188.18 | 187.79 |
| 119.63 | 119.58 | 119.37 | 189.22 | 188.93 | 188.80 |
| 120.00 | 119.72 | 119.51 | 189.61 | 189.05 | 189.06 |
| 120.12 | 119.78 | 119.61 | 189.97 | 189.46 | 189.49 |
| 120.61 | 120.05 | 119.84 | 190.60 | 190.15 | 189.98 |
| 120.87 | 120.56 | 120.36 | 190.87 | 190.23 | 190.22 |

---

---

|        |        |        |        |        |        |
|--------|--------|--------|--------|--------|--------|
| 121.28 | 120.60 | 120.50 | 191.77 | 190.83 | 190.73 |
| 121.35 | 121.01 | 120.79 | 192.02 | 191.55 | 191.47 |
| 121.63 | 121.33 | 121.14 | 192.39 | 191.89 | 191.61 |
| 121.78 | 121.65 | 121.51 | 193.15 | 191.93 | 191.80 |
| 122.01 | 121.67 | 121.63 | 193.94 | 192.98 | 193.06 |
| 122.27 | 122.24 | 122.24 | 194.02 | 193.77 | 193.66 |
| 123.82 | 122.39 | 122.30 | 196.69 | 194.01 | 193.81 |
| 124.86 | 122.78 | 122.79 | 197.06 | 196.35 | 196.24 |
| 125.34 | 124.88 | 124.94 | 197.65 | 196.92 | 196.62 |
| 125.92 | 125.33 | 125.47 | 198.62 | 197.59 | 197.48 |
| 126.07 | 125.93 | 125.82 | 200.39 | 198.46 | 198.31 |
| 126.38 | 126.29 | 126.25 | 202.22 | 200.34 | 200.53 |
| 126.87 | 126.65 | 126.43 | 202.42 | 202.16 | 201.94 |
| 127.38 | 126.85 | 126.75 | 202.84 | 202.33 | 202.14 |
| 127.66 | 127.14 | 126.93 | 203.07 | 202.58 | 202.33 |
| 129.03 | 127.46 | 127.46 | 203.14 | 202.84 | 202.76 |
| 129.58 | 127.66 | 127.60 | 203.52 | 203.12 | 202.91 |
| 129.85 | 129.65 | 129.45 | 203.99 | 203.44 | 203.39 |
| 130.34 | 129.85 | 129.61 | 204.21 | 204.02 | 203.90 |
| 131.06 | 129.94 | 129.93 | 204.79 | 204.10 | 204.03 |
| 132.08 | 130.29 | 130.25 | 205.22 | 204.77 | 204.72 |
| 132.33 | 131.20 | 131.14 | 207.57 | 205.40 | 205.02 |
| 132.63 | 132.00 | 132.08 | 210.38 | 207.44 | 207.64 |
| 132.78 | 132.62 | 132.28 | 210.61 | 210.13 | 210.24 |
| 132.84 | 132.68 | 132.48 | 210.66 | 210.52 | 210.60 |
| 133.04 | 132.75 | 132.70 | 211.64 | 210.60 | 210.71 |
| 133.41 | 132.90 | 132.74 | 211.84 | 211.20 | 211.23 |
| 133.73 | 133.17 | 132.85 | 212.21 | 212.06 | 211.69 |
| 134.14 | 133.33 | 132.88 | 212.80 | 212.19 | 211.93 |
| 134.64 | 134.07 | 133.70 | 214.44 | 212.32 | 212.11 |
| 135.64 | 134.38 | 133.84 | 214.91 | 214.26 | 214.03 |
| 135.77 | 134.52 | 134.33 | 215.18 | 214.84 | 214.78 |
| 137.07 | 135.49 | 135.35 | 215.39 | 215.16 | 214.98 |
| 137.19 | 136.03 | 135.81 | 216.78 | 215.30 | 215.15 |
| 137.62 | 137.16 | 136.91 | 218.56 | 216.82 | 216.69 |
| 137.75 | 137.24 | 137.29 | 219.85 | 218.63 | 218.43 |
| 137.82 | 137.81 | 137.57 | 220.26 | 219.63 | 219.42 |
| 138.24 | 137.89 | 137.70 | 223.48 | 220.12 | 219.86 |
| 138.38 | 138.34 | 138.14 | 223.77 | 223.26 | 222.98 |
| 139.02 | 138.47 | 138.25 | 224.53 | 223.59 | 223.14 |
| 139.81 | 138.58 | 138.56 | 224.92 | 224.45 | 224.29 |
| 140.00 | 139.20 | 138.91 | 225.33 | 224.76 | 224.39 |
| 140.05 | 139.61 | 139.59 | 225.63 | 225.17 | 225.03 |
| 140.18 | 139.90 | 139.79 | 226.43 | 225.36 | 225.18 |

---



---

|        |        |        |        |        |        |
|--------|--------|--------|--------|--------|--------|
| 140.27 | 139.94 | 139.83 | 227.19 | 225.94 | 225.65 |
| 140.37 | 140.25 | 139.93 | 227.58 | 226.47 | 226.33 |
| 140.50 | 140.38 | 140.02 | 228.12 | 227.67 | 227.58 |
| 140.63 | 140.49 | 140.30 | 228.97 | 228.01 | 228.26 |
| 142.30 | 140.87 | 140.62 | 231.96 | 229.02 | 228.66 |
| 142.50 | 141.38 | 140.99 | 233.11 | 231.56 | 231.38 |
| 144.10 | 142.66 | 142.32 | 233.48 | 232.97 | 232.65 |
| 144.19 | 142.72 | 142.49 | 233.84 | 233.25 | 232.98 |
| 144.31 | 143.20 | 143.31 | 234.92 | 233.97 | 233.57 |
| 144.51 | 144.48 | 144.27 | 235.80 | 234.64 | 234.23 |
| 144.62 | 144.63 | 144.37 | 238.33 | 235.54 | 235.20 |
| 144.79 | 144.82 | 144.41 | 239.19 | 238.11 | 238.12 |
| 145.05 | 144.89 | 144.64 | 240.40 | 238.82 | 238.55 |
| 145.43 | 145.11 | 144.74 | 241.32 | 240.08 | 239.83 |
| 145.59 | 145.16 | 145.13 | 241.95 | 241.09 | 240.86 |
| 145.68 | 145.54 | 145.24 | 244.94 | 241.93 | 241.76 |
| 145.77 | 145.73 | 145.56 | 245.88 | 244.40 | 244.20 |
| 146.21 | 145.75 | 145.76 | 246.44 | 245.72 | 245.47 |
| 147.01 | 145.99 | 145.82 | 247.08 | 246.33 | 246.04 |
| 147.16 | 146.34 | 146.09 | 247.48 | 246.98 | 246.37 |
| 148.12 | 147.21 | 147.04 | 249.10 | 247.27 | 246.90 |
| 148.36 | 147.29 | 147.27 | 249.19 | 249.09 | 248.73 |
| 148.57 | 148.05 | 148.02 | 249.56 | 249.13 | 248.80 |
| 149.76 | 148.28 | 148.16 | 249.68 | 249.62 | 249.44 |
| 149.93 | 148.38 | 148.51 | 250.27 | 249.72 | 249.62 |
| 150.08 | 149.85 | 149.56 | 250.66 | 250.44 | 249.99 |
| 150.33 | 150.37 | 150.16 | 250.97 | 250.56 | 250.16 |
| 150.62 | 150.49 | 150.26 | 251.23 | 251.12 | 250.69 |
| 150.91 | 150.81 | 150.44 | 251.52 | 251.25 | 251.11 |
| 151.34 | 150.85 | 150.74 | 252.49 | 251.42 | 251.12 |
| 151.69 | 151.09 | 151.06 | 252.58 | 252.22 | 251.79 |
| 152.23 | 151.35 | 151.22 | 252.64 | 252.67 | 252.18 |
| 153.36 | 152.04 | 151.85 | 253.66 | 252.75 | 252.34 |
| 153.48 | 152.12 | 152.16 | 253.79 | 253.50 | 252.99 |
| 153.98 | 153.10 | 153.11 | 254.56 | 253.67 | 253.18 |
| 154.63 | 153.17 | 153.17 | 255.43 | 254.20 | 254.03 |
| 154.88 | 154.48 | 154.04 | 256.32 | 255.32 | 254.84 |
| 154.97 | 154.52 | 154.20 | 256.36 | 256.30 | 256.07 |
| 155.32 | 154.82 | 154.87 | 256.66 | 256.34 | 256.10 |
| 155.72 | 154.98 | 155.16 | 257.34 | 256.63 | 256.16 |
| 156.23 | 155.66 | 155.44 | 257.64 | 257.23 | 256.79 |
| 156.75 | 155.70 | 155.65 | 258.38 | 257.61 | 257.20 |
| 157.19 | 156.68 | 155.81 | 259.90 | 258.44 | 258.10 |
| 157.75 | 156.77 | 157.25 | 265.12 | 259.76 | 259.30 |

---

---

|        |        |        |            |         |          |         |
|--------|--------|--------|------------|---------|----------|---------|
| 157.99 | 157.54 | 157.40 |            | 265.65  | 265.06   | 264.78  |
| 158.22 | 157.76 | 157.53 |            | 435.85  | 265.57   | 265.37  |
| 158.29 | 157.80 | 157.65 |            | 603.96  | 308.13   | 377.77  |
| 158.58 | 158.11 | 158.03 |            | 953.67  | 346.88   | 501.30  |
| 158.63 | 158.26 | 158.20 |            | 3575.84 | 3580.52  | 3530.58 |
| 158.69 | 158.46 | 158.25 | Zn/Cu(553) | 11.03   | -1761.85 | 11.02   |
| 158.85 | 158.54 | 158.50 |            | 23.26   | 11.26    | 23.88   |
| 159.44 | 158.67 | 158.54 |            | 31.03   | 23.36    | 31.35   |
| 160.83 | 158.88 | 158.69 |            | 39.05   | 31.22    | 32.99   |
| 161.33 | 159.66 | 159.08 |            | 43.78   | 38.97    | 39.23   |
| 161.73 | 160.12 | 159.92 |            | 46.41   | 43.52    | 43.97   |
| 161.99 | 161.39 | 161.28 |            | 47.58   | 46.07    | 46.17   |
| 162.72 | 161.64 | 161.50 |            | 51.78   | 47.38    | 47.62   |
| 163.33 | 161.89 | 161.95 |            | 52.07   | 49.14    | 49.03   |
| 164.67 | 162.45 | 162.25 |            | 54.87   | 51.85    | 51.74   |
| 164.71 | 163.13 | 162.76 |            | 57.74   | 53.57    | 54.18   |
| 165.34 | 164.69 | 164.51 |            | 58.06   | 56.86    | 56.13   |
| 165.63 | 164.85 | 164.78 |            | 63.91   | 58.00    | 57.92   |
| 166.10 | 165.70 | 165.47 |            | 65.13   | 58.27    | 60.23   |
| 166.24 | 165.81 | 165.66 |            | 65.26   | 64.64    | 64.73   |
| 167.35 | 165.93 | 165.82 |            | 65.41   | 65.21    | 65.11   |
| 169.18 | 166.14 | 165.90 |            | 67.43   | 65.31    | 65.19   |
| 169.43 | 166.84 | 166.70 |            | 67.79   | 65.52    | 65.71   |
| 169.58 | 169.05 | 168.34 |            | 68.52   | 67.42    | 67.51   |
| 169.98 | 169.33 | 169.02 |            | 69.36   | 68.61    | 68.69   |
| 171.31 | 169.59 | 169.18 |            | 69.47   | 69.21    | 69.17   |
| 171.89 | 169.85 | 169.48 |            | 70.15   | 69.41    | 69.59   |
| 173.60 | 170.88 | 169.84 |            | 71.18   | 69.77    | 69.85   |
| 173.85 | 171.42 | 171.19 |            | 72.51   | 70.39    | 70.20   |
| 174.19 | 172.62 | 172.02 |            | 74.57   | 71.07    | 71.15   |
| 174.37 | 173.69 | 173.58 |            | 75.64   | 73.33    | 73.28   |
| 174.98 | 174.12 | 173.92 |            | 76.15   | 75.30    | 75.71   |
| 175.54 | 174.35 | 174.07 |            | 76.30   | 75.80    | 75.80   |
| 175.74 | 174.54 | 174.23 |            | 79.54   | 76.23    | 76.18   |
| 176.15 | 175.06 | 174.55 |            | 80.42   | 76.36    | 76.26   |
| 177.32 | 175.63 | 175.14 |            | 81.03   | 79.25    | 79.59   |
| 177.75 | 176.02 | 175.41 |            | 82.49   | 80.99    | 81.27   |
| 179.92 | 176.46 | 175.81 |            | 83.71   | 81.10    | 81.68   |
| 180.29 | 177.71 | 177.39 |            | 84.09   | 83.70    | 83.48   |
| 180.47 | 178.04 | 177.43 |            | 85.50   | 84.12    | 84.12   |
| 180.59 | 179.61 | 179.77 |            | 85.91   | 84.29    | 84.37   |
| 181.14 | 180.39 | 180.02 |            | 86.02   | 85.95    | 86.21   |
| 181.29 | 180.57 | 180.10 |            | 90.67   | 86.33    | 86.50   |
| 182.47 | 180.71 | 180.50 |            | 90.89   | 86.75    | 86.63   |

---

---

|        |        |        |        |        |        |
|--------|--------|--------|--------|--------|--------|
| 182.96 | 180.87 | 181.10 | 91.35  | 90.93  | 90.65  |
| 183.07 | 181.41 | 181.35 | 92.56  | 91.09  | 91.31  |
| 183.37 | 182.80 | 182.65 | 93.56  | 91.42  | 91.95  |
| 184.68 | 182.97 | 182.81 | 93.64  | 92.26  | 92.94  |
| 184.88 | 183.33 | 182.94 | 94.27  | 93.67  | 93.57  |
| 186.46 | 183.64 | 182.96 | 94.67  | 93.94  | 93.91  |
| 187.81 | 184.84 | 184.55 | 94.93  | 94.06  | 94.38  |
| 188.52 | 185.12 | 184.71 | 95.39  | 94.52  | 94.71  |
| 189.11 | 186.36 | 186.26 | 95.72  | 94.86  | 94.93  |
| 189.28 | 186.92 | 187.24 | 96.43  | 95.32  | 95.36  |
| 189.37 | 187.73 | 187.94 | 96.68  | 95.61  | 95.60  |
| 189.83 | 188.95 | 188.99 | 97.00  | 96.43  | 96.34  |
| 190.14 | 189.22 | 189.03 | 97.50  | 96.83  | 96.95  |
| 191.51 | 189.28 | 189.45 | 98.77  | 97.40  | 97.50  |
| 191.82 | 189.65 | 189.64 | 99.12  | 98.21  | 97.87  |
| 192.11 | 189.94 | 189.79 | 99.39  | 98.51  | 98.77  |
| 193.16 | 190.69 | 191.33 | 99.57  | 99.10  | 98.84  |
| 193.72 | 191.79 | 191.74 | 99.88  | 99.22  | 99.25  |
| 197.09 | 191.92 | 192.00 | 100.13 | 99.34  | 99.40  |
| 197.79 | 192.37 | 193.21 | 100.34 | 99.42  | 99.60  |
| 199.42 | 193.73 | 193.28 | 100.51 | 100.10 | 99.85  |
| 199.89 | 193.83 | 196.93 | 101.26 | 100.43 | 100.02 |
| 200.96 | 197.18 | 197.44 | 101.48 | 100.81 | 100.59 |
| 201.74 | 198.97 | 199.28 | 101.86 | 101.34 | 100.75 |
| 202.34 | 199.81 | 199.65 | 102.20 | 101.55 | 101.43 |
| 203.88 | 199.87 | 200.94 | 102.65 | 101.73 | 101.69 |
| 204.11 | 201.23 | 201.58 | 105.15 | 102.19 | 102.31 |
| 204.74 | 201.81 | 202.09 | 105.90 | 102.49 | 102.59 |
| 204.81 | 202.34 | 204.09 | 107.11 | 106.00 | 102.96 |
| 205.17 | 204.53 | 204.23 | 107.21 | 107.31 | 105.52 |
| 205.47 | 204.67 | 204.42 | 107.47 | 107.42 | 107.41 |
| 206.47 | 204.81 | 204.53 | 107.95 | 107.59 | 107.49 |
| 208.05 | 205.00 | 204.79 | 108.61 | 107.97 | 107.79 |
| 208.12 | 205.11 | 204.86 | 109.06 | 108.30 | 108.27 |
| 209.15 | 205.41 | 206.43 | 109.30 | 108.45 | 108.39 |
| 209.71 | 206.67 | 207.84 | 109.41 | 108.88 | 108.76 |
| 210.95 | 208.36 | 208.09 | 109.89 | 109.18 | 109.06 |
| 211.48 | 208.46 | 209.28 | 110.22 | 109.29 | 109.42 |
| 211.88 | 209.72 | 209.72 | 111.22 | 109.94 | 109.71 |
| 212.34 | 209.90 | 210.85 | 112.03 | 110.14 | 109.99 |
| 212.97 | 211.32 | 211.17 | 112.65 | 110.78 | 110.81 |
| 213.89 | 211.57 | 211.47 | 113.33 | 112.40 | 111.04 |
| 213.96 | 212.11 | 211.88 | 113.57 | 112.62 | 112.77 |
| 215.42 | 212.26 | 212.25 | 113.68 | 113.24 | 113.35 |

---

---

|        |        |        |        |        |        |
|--------|--------|--------|--------|--------|--------|
| 215.57 | 213.52 | 213.74 | 113.95 | 113.49 | 113.53 |
| 215.79 | 213.96 | 214.00 | 114.02 | 113.94 | 113.67 |
| 217.18 | 214.60 | 215.27 | 114.29 | 114.03 | 114.02 |
| 218.55 | 215.74 | 215.36 | 114.41 | 114.19 | 114.17 |
| 218.75 | 215.79 | 215.65 | 114.89 | 114.27 | 114.31 |
| 220.06 | 216.09 | 216.95 | 115.36 | 114.52 | 114.42 |
| 220.43 | 217.25 | 218.31 | 116.31 | 114.64 | 114.57 |
| 220.60 | 218.87 | 218.45 | 117.40 | 114.94 | 114.85 |
| 221.69 | 218.96 | 219.92 | 117.48 | 116.41 | 114.99 |
| 222.18 | 220.50 | 220.05 | 117.67 | 117.05 | 116.43 |
| 224.65 | 220.53 | 220.60 | 117.83 | 117.57 | 117.24 |
| 225.10 | 221.08 | 221.66 | 118.22 | 117.71 | 117.62 |
| 225.76 | 222.11 | 221.77 | 118.77 | 117.99 | 117.68 |
| 226.32 | 222.52 | 224.12 | 119.29 | 118.76 | 117.93 |
| 228.49 | 224.57 | 224.93 | 119.67 | 119.05 | 118.52 |
| 229.51 | 225.00 | 225.58 | 119.82 | 119.22 | 119.27 |
| 229.78 | 225.74 | 226.07 | 120.13 | 119.54 | 119.35 |
| 229.96 | 226.22 | 228.57 | 120.46 | 119.76 | 119.58 |
| 230.47 | 228.94 | 229.15 | 120.85 | 120.09 | 119.65 |
| 232.60 | 229.65 | 229.38 | 121.06 | 120.41 | 119.98 |
| 235.57 | 230.02 | 229.77 | 121.13 | 120.87 | 120.42 |
| 236.14 | 230.20 | 230.05 | 121.46 | 120.95 | 120.64 |
| 236.33 | 230.56 | 231.81 | 121.88 | 121.15 | 120.97 |
| 237.63 | 232.06 | 235.08 | 121.89 | 121.27 | 121.34 |
| 237.81 | 235.62 | 235.55 | 122.27 | 121.88 | 121.50 |
| 240.83 | 235.99 | 236.12 | 123.65 | 121.97 | 121.73 |
| 240.89 | 236.55 | 237.61 | 124.98 | 122.36 | 122.09 |
| 241.91 | 237.95 | 237.71 | 125.43 | 123.99 | 122.33 |
| 242.20 | 238.09 | 240.55 | 125.66 | 124.68 | 124.36 |
| 244.70 | 240.93 | 240.77 | 125.78 | 125.12 | 124.96 |
| 245.18 | 241.22 | 241.52 | 126.40 | 125.96 | 125.23 |
| 245.34 | 241.96 | 241.95 | 126.87 | 126.06 | 125.89 |
| 245.54 | 242.50 | 243.20 | 127.20 | 126.32 | 126.23 |
| 246.07 | 244.95 | 245.04 | 127.79 | 126.78 | 126.48 |
| 246.27 | 245.49 | 245.09 | 128.61 | 127.10 | 126.64 |
| 246.50 | 245.56 | 245.36 | 129.38 | 127.46 | 127.18 |
| 246.54 | 245.66 | 245.59 | 129.54 | 128.65 | 127.56 |
| 246.72 | 246.24 | 245.99 | 130.14 | 129.09 | 128.66 |
| 246.86 | 246.45 | 246.07 | 130.83 | 129.43 | 129.13 |
| 246.99 | 246.53 | 246.18 | 131.90 | 129.87 | 129.57 |
| 247.34 | 246.59 | 246.25 | 132.18 | 130.83 | 129.89 |
| 247.70 | 246.73 | 246.63 | 132.50 | 131.39 | 130.58 |
| 248.00 | 247.03 | 246.82 | 132.80 | 132.27 | 131.08 |
| 248.73 | 247.12 | 246.87 | 132.93 | 132.46 | 132.16 |

---

|            |         |          |         |        |        |        |
|------------|---------|----------|---------|--------|--------|--------|
|            | 249.38  | 247.21   | 246.97  | 133.06 | 132.67 | 132.28 |
|            | 250.82  | 247.28   | 247.27  | 133.43 | 132.96 | 132.47 |
|            | 251.85  | 247.56   | 247.37  | 133.63 | 133.00 | 132.81 |
|            | 251.95  | 247.65   | 248.65  | 134.08 | 133.17 | 132.86 |
|            | 252.04  | 249.20   | 250.29  | 134.75 | 133.99 | 133.12 |
|            | 252.42  | 250.72   | 250.53  | 135.38 | 134.05 | 133.66 |
|            | 253.06  | 251.38   | 251.92  | 135.95 | 134.66 | 133.83 |
|            | 255.77  | 252.14   | 251.94  | 136.62 | 135.25 | 134.38 |
|            | 257.01  | 252.21   | 252.56  | 137.15 | 135.37 | 135.11 |
|            | 261.07  | 252.25   | 252.72  | 137.56 | 136.38 | 135.60 |
|            | 262.38  | 252.99   | 255.15  | 137.80 | 137.07 | 136.66 |
|            | 384.98  | 255.62   | 256.65  | 137.84 | 137.34 | 137.10 |
|            | 437.73  | 256.98   | 259.60  | 138.12 | 137.62 | 137.42 |
|            | 525.06  | 260.56   | 261.47  | 138.25 | 137.71 | 137.48 |
|            | 547.99  | 261.89   | 283.70  | 138.90 | 137.98 | 137.65 |
|            | 557.50  | 390.07   | 503.37  | 139.31 | 138.43 | 137.81 |
|            | 3559.11 | 1669.03  | 3547.94 | 139.72 | 139.00 | 138.38 |
| Nb/Cu(553) | 12.13   | -1203.21 | 10.00   | 139.88 | 139.16 | 138.67 |
|            | 16.63   | 11.65    | 15.14   | 140.08 | 139.35 | 138.90 |
|            | 21.85   | 21.50    | 22.35   | 140.15 | 139.85 | 139.32 |
|            | 31.67   | 31.60    | 31.72   | 140.28 | 140.04 | 139.68 |
|            | 38.15   | 36.70    | 38.56   | 140.49 | 140.18 | 139.88 |
|            | 42.45   | 38.08    | 42.83   | 140.68 | 140.28 | 139.99 |
|            | 44.74   | 38.69    | 43.18   | 142.02 | 140.43 | 140.11 |
|            | 46.34   | 43.62    | 45.20   | 142.33 | 141.08 | 140.11 |
|            | 52.41   | 45.02    | 52.60   | 142.74 | 141.94 | 140.77 |
|            | 53.75   | 52.19    | 53.72   | 143.96 | 142.04 | 141.87 |
|            | 54.72   | 53.79    | 54.94   | 144.22 | 142.61 | 142.34 |
|            | 58.77   | 54.20    | 58.85   | 144.36 | 144.29 | 142.39 |
|            | 59.66   | 58.56    | 59.75   | 144.54 | 144.51 | 144.19 |
|            | 60.89   | 59.68    | 60.72   | 144.74 | 144.56 | 144.32 |
|            | 63.53   | 60.03    | 63.39   | 144.82 | 144.62 | 144.39 |
|            | 65.05   | 63.13    | 64.79   | 145.31 | 144.83 | 144.48 |
|            | 66.37   | 64.95    | 67.10   | 145.60 | 144.93 | 144.57 |
|            | 67.25   | 66.79    | 67.29   | 145.62 | 145.21 | 144.62 |
|            | 67.49   | 67.19    | 68.07   | 145.80 | 145.74 | 145.18 |
|            | 69.26   | 67.87    | 69.09   | 146.29 | 145.83 | 145.41 |
|            | 69.66   | 69.57    | 69.83   | 146.96 | 145.86 | 145.62 |
|            | 69.95   | 69.88    | 70.14   | 147.41 | 146.26 | 145.95 |
|            | 70.54   | 70.18    | 70.30   | 147.87 | 147.11 | 146.12 |
|            | 71.20   | 70.40    | 71.23   | 148.32 | 147.45 | 146.97 |
|            | 73.13   | 71.29    | 73.21   | 148.39 | 147.75 | 147.20 |
|            | 76.06   | 73.13    | 75.96   | 149.51 | 148.23 | 147.81 |
|            | 76.48   | 76.01    | 76.61   | 149.71 | 148.35 | 148.12 |

---

|        |        |        |        |        |        |
|--------|--------|--------|--------|--------|--------|
| 77.28  | 76.64  | 77.18  | 149.99 | 149.42 | 148.28 |
| 77.48  | 77.35  | 77.33  | 150.45 | 149.61 | 149.46 |
| 77.78  | 77.47  | 77.40  | 150.47 | 149.81 | 149.61 |
| 78.99  | 77.76  | 78.91  | 150.82 | 150.21 | 149.94 |
| 81.90  | 78.96  | 82.01  | 151.35 | 150.60 | 150.07 |
| 82.63  | 82.03  | 82.41  | 151.83 | 150.82 | 150.35 |
| 84.17  | 82.63  | 84.05  | 152.31 | 151.21 | 150.68 |
| 84.29  | 84.08  | 84.13  | 153.21 | 151.77 | 151.04 |
| 85.14  | 84.30  | 85.37  | 153.51 | 152.29 | 151.57 |
| 85.75  | 85.25  | 85.79  | 153.99 | 152.87 | 152.32 |
| 86.24  | 85.78  | 86.27  | 154.50 | 153.12 | 152.75 |
| 87.32  | 86.34  | 86.98  | 154.68 | 154.12 | 152.95 |
| 88.86  | 87.23  | 89.69  | 154.90 | 154.40 | 153.93 |
| 91.92  | 89.59  | 92.14  | 155.12 | 154.69 | 154.32 |
| 93.06  | 92.27  | 92.89  | 155.76 | 154.98 | 154.73 |
| 93.53  | 92.84  | 93.84  | 156.21 | 155.03 | 154.98 |
| 93.92  | 93.87  | 94.27  | 156.55 | 155.63 | 155.40 |
| 94.25  | 94.16  | 94.60  | 157.21 | 156.34 | 155.51 |
| 94.76  | 94.71  | 95.07  | 157.70 | 156.44 | 156.21 |
| 95.96  | 94.82  | 95.49  | 157.88 | 157.33 | 156.92 |
| 96.57  | 95.67  | 96.54  | 158.07 | 157.56 | 157.30 |
| 96.80  | 96.67  | 96.67  | 158.31 | 157.61 | 157.52 |
| 96.82  | 96.84  | 96.88  | 158.50 | 157.95 | 157.59 |
| 97.87  | 96.98  | 98.63  | 158.61 | 158.05 | 157.75 |
| 98.28  | 98.38  | 98.91  | 158.82 | 158.20 | 157.95 |
| 99.10  | 98.50  | 99.31  | 158.83 | 158.42 | 158.14 |
| 99.51  | 99.24  | 99.92  | 159.96 | 158.65 | 158.26 |
| 99.66  | 99.83  | 100.13 | 160.57 | 158.83 | 158.50 |
| 99.79  | 99.92  | 100.46 | 161.10 | 159.72 | 158.67 |
| 100.66 | 100.37 | 100.50 | 161.67 | 159.78 | 159.27 |
| 100.81 | 100.69 | 100.69 | 162.05 | 161.10 | 159.88 |
| 100.89 | 100.86 | 100.98 | 162.56 | 161.69 | 160.96 |
| 101.02 | 100.93 | 101.04 | 163.01 | 162.03 | 161.56 |
| 101.45 | 100.97 | 101.45 | 164.65 | 162.32 | 161.70 |
| 101.51 | 101.53 | 101.72 | 164.77 | 162.93 | 162.09 |
| 101.73 | 101.77 | 101.85 | 164.84 | 164.71 | 162.41 |
| 101.88 | 101.82 | 102.29 | 165.65 | 164.84 | 164.47 |
| 102.34 | 102.11 | 102.70 | 165.91 | 164.86 | 164.61 |
| 103.07 | 102.52 | 103.55 | 166.22 | 165.47 | 164.86 |
| 103.64 | 103.40 | 104.10 | 167.31 | 165.77 | 165.39 |
| 106.10 | 103.59 | 106.40 | 168.91 | 166.04 | 165.61 |
| 106.20 | 106.26 | 106.45 | 169.19 | 166.91 | 165.89 |
| 106.55 | 106.32 | 106.87 | 169.58 | 168.90 | 166.72 |
| 107.17 | 106.73 | 107.65 | 169.92 | 169.20 | 168.60 |

---

---

|        |        |        |        |        |        |
|--------|--------|--------|--------|--------|--------|
| 107.61 | 107.34 | 107.73 | 171.23 | 169.57 | 168.95 |
| 107.94 | 107.39 | 108.76 | 172.26 | 169.81 | 169.41 |
| 108.98 | 108.46 | 109.06 | 173.42 | 171.20 | 169.59 |
| 110.59 | 108.52 | 110.02 | 173.69 | 171.97 | 171.14 |
| 110.89 | 110.34 | 110.75 | 173.98 | 173.31 | 172.04 |
| 111.07 | 110.86 | 111.32 | 174.34 | 173.55 | 173.11 |
| 111.67 | 111.19 | 111.64 | 174.63 | 173.80 | 173.47 |
| 112.51 | 111.59 | 112.54 | 175.25 | 174.29 | 173.80 |
| 113.00 | 112.72 | 113.15 | 175.73 | 174.69 | 174.04 |
| 113.39 | 113.01 | 113.26 | 175.87 | 175.34 | 174.52 |
| 113.65 | 113.35 | 113.82 | 177.17 | 175.52 | 175.11 |
| 113.79 | 113.63 | 113.89 | 177.65 | 175.88 | 175.22 |
| 114.69 | 113.75 | 114.87 | 179.30 | 177.31 | 175.68 |
| 114.83 | 114.67 | 115.04 | 180.09 | 177.62 | 177.22 |
| 115.28 | 114.91 | 115.18 | 180.43 | 179.67 | 177.46 |
| 115.43 | 115.18 | 115.32 | 180.68 | 180.06 | 179.31 |
| 115.62 | 115.31 | 115.39 | 180.85 | 180.31 | 179.79 |
| 116.56 | 115.46 | 115.94 | 181.29 | 180.51 | 179.91 |
| 116.81 | 116.14 | 116.56 | 182.39 | 181.00 | 180.18 |
| 117.77 | 116.57 | 117.19 | 182.64 | 181.33 | 180.73 |
| 117.99 | 117.71 | 117.84 | 183.12 | 182.13 | 181.23 |
| 118.15 | 117.92 | 118.08 | 183.15 | 182.83 | 182.01 |
| 119.25 | 118.37 | 118.94 | 184.26 | 183.01 | 182.48 |
| 119.60 | 119.19 | 119.19 | 184.43 | 183.13 | 182.75 |
| 120.00 | 119.46 | 119.52 | 185.87 | 184.31 | 182.86 |
| 121.44 | 119.77 | 121.31 | 187.68 | 184.68 | 184.13 |
| 121.48 | 121.42 | 121.45 | 188.15 | 185.74 | 184.46 |
| 121.63 | 121.54 | 121.66 | 188.59 | 187.51 | 185.45 |
| 122.03 | 121.68 | 121.96 | 189.14 | 188.30 | 186.72 |
| 122.51 | 121.98 | 122.35 | 189.54 | 188.66 | 188.02 |
| 122.77 | 122.44 | 122.55 | 189.63 | 188.97 | 188.54 |
| 122.87 | 122.77 | 122.69 | 190.21 | 189.27 | 188.90 |
| 122.93 | 122.84 | 122.94 | 191.35 | 189.80 | 189.19 |
| 123.30 | 122.98 | 123.03 | 191.64 | 190.17 | 189.68 |
| 123.46 | 123.20 | 123.41 | 192.05 | 191.28 | 190.13 |
| 123.85 | 123.43 | 123.62 | 192.72 | 191.72 | 191.10 |
| 123.88 | 123.75 | 123.79 | 193.41 | 192.10 | 191.62 |
| 124.43 | 123.83 | 124.19 | 197.11 | 193.12 | 192.07 |
| 124.73 | 124.30 | 124.54 | 198.13 | 193.28 | 192.85 |
| 125.37 | 124.61 | 125.08 | 199.20 | 197.09 | 193.13 |
| 125.53 | 125.39 | 125.51 | 199.68 | 197.56 | 196.96 |
| 125.99 | 125.45 | 125.92 | 200.62 | 199.15 | 197.51 |
| 126.52 | 126.32 | 126.47 | 201.74 | 199.98 | 198.72 |
| 127.85 | 126.55 | 127.95 | 202.28 | 200.74 | 199.57 |

---

---

|        |        |        |        |        |        |
|--------|--------|--------|--------|--------|--------|
| 128.15 | 127.94 | 128.01 | 203.38 | 201.72 | 200.56 |
| 128.65 | 128.00 | 128.40 | 203.58 | 202.19 | 201.53 |
| 129.10 | 128.53 | 128.87 | 204.54 | 203.38 | 202.05 |
| 129.22 | 128.74 | 129.29 | 204.73 | 203.68 | 203.31 |
| 129.50 | 129.36 | 129.64 | 205.34 | 204.34 | 203.92 |
| 130.39 | 129.63 | 129.94 | 205.74 | 204.72 | 204.24 |
| 131.08 | 130.21 | 130.56 | 206.01 | 204.98 | 204.53 |
| 131.43 | 130.89 | 131.01 | 207.79 | 205.30 | 204.74 |
| 132.31 | 131.18 | 132.16 | 207.94 | 206.21 | 205.02 |
| 133.56 | 132.09 | 133.56 | 209.07 | 207.88 | 205.91 |
| 133.91 | 133.52 | 133.94 | 209.39 | 208.15 | 207.54 |
| 134.38 | 134.00 | 134.37 | 210.53 | 209.24 | 207.94 |
| 134.73 | 134.37 | 134.68 | 211.13 | 209.73 | 209.01 |
| 134.91 | 134.76 | 134.82 | 211.90 | 210.35 | 209.39 |
| 135.03 | 134.99 | 134.94 | 212.16 | 211.31 | 209.54 |
| 135.48 | 135.02 | 135.69 | 212.91 | 211.64 | 211.05 |
| 135.80 | 135.70 | 135.81 | 213.84 | 212.12 | 211.24 |
| 136.01 | 135.89 | 136.33 | 214.04 | 212.44 | 211.95 |
| 136.91 | 136.27 | 136.99 | 215.37 | 213.17 | 212.47 |
| 137.35 | 136.77 | 137.37 | 215.74 | 213.94 | 213.70 |
| 138.34 | 137.08 | 138.45 | 215.82 | 214.70 | 213.99 |
| 138.75 | 138.37 | 138.58 | 217.05 | 215.69 | 215.16 |
| 138.97 | 138.62 | 138.76 | 218.56 | 215.95 | 215.41 |
| 139.41 | 138.85 | 139.19 | 218.80 | 216.93 | 215.80 |
| 139.54 | 139.21 | 139.38 | 220.10 | 218.20 | 216.79 |
| 140.24 | 139.48 | 140.00 | 220.42 | 218.50 | 218.11 |
| 140.76 | 140.21 | 140.59 | 220.71 | 219.05 | 218.59 |
| 141.45 | 140.71 | 140.94 | 221.43 | 220.28 | 219.82 |
| 141.48 | 141.16 | 141.26 | 222.30 | 220.49 | 220.06 |
| 141.76 | 141.44 | 141.41 | 223.56 | 221.05 | 220.67 |
| 142.50 | 141.65 | 142.09 | 224.54 | 222.01 | 221.77 |
| 143.12 | 142.35 | 143.00 | 225.68 | 222.11 | 221.79 |
| 143.74 | 143.16 | 143.45 | 225.78 | 223.56 | 222.18 |
| 145.37 | 143.55 | 145.25 | 228.54 | 224.83 | 224.57 |
| 145.46 | 145.38 | 145.33 | 228.78 | 225.71 | 225.49 |
| 145.79 | 145.44 | 145.44 | 229.69 | 225.98 | 225.77 |
| 145.97 | 145.63 | 145.63 | 229.99 | 228.59 | 227.42 |
| 146.20 | 145.88 | 145.77 | 230.32 | 229.10 | 228.64 |
| 146.21 | 146.23 | 146.07 | 231.39 | 229.97 | 229.50 |
| 146.43 | 146.28 | 146.21 | 233.83 | 230.17 | 229.86 |
| 146.96 | 146.35 | 146.72 | 235.76 | 230.37 | 229.94 |
| 147.39 | 146.92 | 147.13 | 236.04 | 231.95 | 231.36 |
| 147.57 | 147.44 | 147.21 | 236.63 | 234.57 | 233.97 |
| 147.78 | 147.49 | 147.45 | 237.93 | 236.07 | 235.68 |

---



---

|        |        |        |            |         |          |         |
|--------|--------|--------|------------|---------|----------|---------|
| 148.04 | 147.68 | 147.73 |            | 239.65  | 236.40   | 235.75  |
| 148.14 | 147.89 | 148.01 |            | 240.85  | 236.91   | 236.68  |
| 148.31 | 148.14 | 148.13 |            | 241.71  | 238.05   | 237.84  |
| 148.50 | 148.41 | 148.43 |            | 242.04  | 240.01   | 238.99  |
| 148.82 | 148.58 | 148.80 |            | 243.05  | 241.23   | 240.83  |
| 149.47 | 149.07 | 149.05 |            | 244.94  | 241.39   | 240.93  |
| 149.75 | 149.38 | 149.42 |            | 245.28  | 242.70   | 241.91  |
| 149.83 | 149.65 | 149.76 |            | 245.50  | 243.20   | 242.24  |
| 150.25 | 149.88 | 150.08 |            | 246.02  | 245.62   | 245.04  |
| 150.61 | 150.10 | 150.45 |            | 246.13  | 245.63   | 245.09  |
| 150.94 | 150.63 | 150.66 |            | 246.30  | 245.89   | 245.47  |
| 151.88 | 150.80 | 151.66 |            | 246.59  | 246.05   | 245.55  |
| 152.18 | 151.90 | 151.87 |            | 246.65  | 246.49   | 246.09  |
| 152.23 | 152.21 | 152.04 |            | 247.04  | 246.57   | 246.17  |
| 152.60 | 152.28 | 152.21 |            | 247.11  | 246.66   | 246.25  |
| 152.73 | 152.53 | 152.61 |            | 247.45  | 246.71   | 246.32  |
| 152.92 | 152.77 | 152.69 |            | 247.83  | 247.46   | 246.69  |
| 153.09 | 152.81 | 152.89 |            | 248.19  | 247.53   | 246.74  |
| 154.44 | 153.24 | 153.85 |            | 249.00  | 247.64   | 246.95  |
| 154.81 | 154.10 | 154.15 |            | 249.44  | 247.75   | 247.16  |
| 155.34 | 154.50 | 155.12 |            | 250.69  | 248.01   | 247.35  |
| 156.06 | 155.23 | 155.30 |            | 250.92  | 248.36   | 247.40  |
| 156.97 | 155.46 | 156.51 |            | 252.04  | 249.41   | 248.60  |
| 157.18 | 156.89 | 157.02 |            | 252.16  | 250.87   | 249.56  |
| 157.42 | 157.18 | 157.21 |            | 252.25  | 251.15   | 250.39  |
| 157.65 | 157.50 | 157.37 |            | 252.96  | 252.12   | 252.00  |
| 157.96 | 157.54 | 157.72 |            | 255.84  | 252.13   | 252.01  |
| 158.11 | 158.03 | 157.88 |            | 257.15  | 253.21   | 252.47  |
| 158.70 | 158.27 | 158.30 |            | 261.15  | 254.20   | 252.77  |
| 159.23 | 158.62 | 158.96 |            | 262.18  | 255.86   | 255.23  |
| 159.71 | 158.97 | 159.52 |            | 366.34  | 257.17   | 256.56  |
| 159.86 | 159.82 | 159.69 |            | 450.30  | 261.09   | 257.60  |
| 159.90 | 159.92 | 159.87 |            | 538.52  | 262.38   | 261.30  |
| 160.22 | 160.02 | 160.01 |            | 554.49  | 469.24   | 264.01  |
| 160.41 | 160.17 | 160.12 |            | 603.37  | 549.86   | 432.37  |
| 160.89 | 160.39 | 160.75 |            | 3548.09 | 3496.97  | 3537.93 |
| 161.19 | 160.96 | 161.03 | Cd/Cu(553) | 20.68   | -1679.23 | 21.31   |
| 161.77 | 161.36 | 161.41 |            | 30.71   | 20.81    | 32.63   |
| 162.04 | 161.54 | 161.70 |            | 35.53   | 32.24    | 38.46   |
| 162.20 | 161.84 | 162.07 |            | 40.48   | 38.17    | 43.69   |
| 162.44 | 162.11 | 162.18 |            | 43.60   | 43.06    | 44.98   |
| 163.39 | 162.45 | 162.88 |            | 45.31   | 44.36    | 52.26   |
| 164.05 | 163.45 | 163.45 |            | 52.28   | 46.46    | 53.59   |
| 164.57 | 164.08 | 163.92 |            | 53.65   | 52.64    | 54.09   |

---

---

|        |        |        |       |       |       |
|--------|--------|--------|-------|-------|-------|
| 164.78 | 164.56 | 164.48 | 54.45 | 53.53 | 59.07 |
| 165.71 | 164.92 | 164.87 | 58.98 | 53.88 | 59.74 |
| 165.91 | 165.29 | 165.22 | 59.85 | 59.08 | 60.00 |
| 166.24 | 166.11 | 165.86 | 61.23 | 59.95 | 64.20 |
| 166.38 | 166.35 | 166.19 | 64.26 | 60.03 | 64.83 |
| 166.72 | 166.45 | 166.23 | 65.02 | 64.33 | 65.16 |
| 167.38 | 166.56 | 166.43 | 65.89 | 64.88 | 67.34 |
| 167.49 | 167.26 | 167.05 | 67.27 | 65.07 | 67.61 |
| 167.83 | 167.72 | 167.64 | 67.73 | 67.06 | 69.46 |
| 169.43 | 168.23 | 167.90 | 69.70 | 67.29 | 70.53 |
| 169.80 | 169.47 | 169.38 | 70.49 | 69.45 | 71.07 |
| 170.90 | 169.79 | 169.71 | 71.26 | 70.25 | 71.62 |
| 171.58 | 170.90 | 170.80 | 71.50 | 70.77 | 71.73 |
| 172.19 | 171.74 | 171.44 | 72.81 | 71.59 | 74.79 |
| 173.28 | 172.07 | 171.91 | 74.62 | 71.74 | 75.36 |
| 173.67 | 173.28 | 173.18 | 76.32 | 74.79 | 77.09 |
| 174.27 | 173.65 | 173.48 | 77.00 | 75.37 | 78.06 |
| 175.78 | 174.61 | 174.40 | 78.27 | 76.80 | 78.48 |
| 175.90 | 175.50 | 175.24 | 78.67 | 78.14 | 79.03 |
| 176.75 | 176.07 | 176.08 | 78.88 | 78.40 | 79.17 |
| 177.20 | 176.76 | 176.51 | 80.78 | 78.81 | 82.63 |
| 177.96 | 177.22 | 176.98 | 83.00 | 79.08 | 83.61 |
| 178.56 | 177.89 | 177.70 | 83.32 | 82.10 | 84.03 |
| 178.74 | 178.25 | 178.08 | 83.65 | 83.23 | 84.55 |
| 180.59 | 178.68 | 178.57 | 84.50 | 83.58 | 86.09 |
| 180.75 | 180.39 | 180.08 | 85.04 | 84.21 | 86.36 |
| 183.19 | 180.68 | 180.55 | 86.33 | 85.72 | 86.79 |
| 183.64 | 183.15 | 182.83 | 87.41 | 86.36 | 88.32 |
| 183.69 | 183.57 | 183.34 | 88.03 | 86.53 | 88.45 |
| 183.95 | 183.69 | 183.43 | 89.48 | 87.18 | 90.94 |
| 185.00 | 183.90 | 183.85 | 90.01 | 88.46 | 91.69 |
| 185.20 | 184.91 | 184.71 | 92.00 | 89.04 | 93.18 |
| 185.61 | 185.22 | 184.98 | 93.56 | 91.67 | 93.58 |
| 186.47 | 185.46 | 185.21 | 94.00 | 92.14 | 94.66 |
| 186.68 | 186.24 | 185.73 | 94.49 | 93.02 | 95.38 |
| 187.89 | 186.52 | 186.12 | 94.93 | 94.38 | 95.78 |
| 188.53 | 187.82 | 187.57 | 95.74 | 94.46 | 96.30 |
| 189.39 | 188.40 | 188.06 | 96.49 | 95.38 | 97.13 |
| 189.54 | 189.44 | 189.28 | 96.91 | 96.19 | 97.82 |
| 189.85 | 189.62 | 189.53 | 97.57 | 96.77 | 98.67 |
| 190.35 | 190.07 | 189.85 | 98.40 | 97.55 | 98.89 |
| 190.97 | 190.23 | 189.90 | 98.75 | 98.31 | 99.11 |
| 191.08 | 190.77 | 190.50 | 99.16 | 98.40 | 99.45 |
| 191.83 | 190.97 | 190.81 | 99.55 | 98.90 | 99.79 |

---

---

|        |        |        |        |        |        |
|--------|--------|--------|--------|--------|--------|
| 192.07 | 191.75 | 191.50 | 99.73  | 99.39  | 100.18 |
| 192.60 | 192.00 | 191.63 | 99.93  | 99.52  | 100.88 |
| 193.43 | 192.46 | 192.11 | 100.10 | 100.01 | 100.95 |
| 194.05 | 193.57 | 193.64 | 100.96 | 100.36 | 101.01 |
| 194.29 | 193.90 | 193.77 | 101.05 | 100.79 | 101.43 |
| 196.76 | 194.09 | 193.88 | 101.46 | 100.94 | 101.90 |
| 197.09 | 196.60 | 196.40 | 102.07 | 101.10 | 102.28 |
| 197.68 | 197.03 | 196.73 | 102.43 | 101.49 | 102.32 |
| 199.81 | 197.65 | 197.49 | 102.53 | 101.92 | 102.74 |
| 200.81 | 199.51 | 199.46 | 102.77 | 102.19 | 102.82 |
| 202.31 | 200.93 | 200.72 | 103.09 | 102.61 | 103.03 |
| 202.48 | 202.27 | 201.96 | 104.08 | 102.66 | 104.66 |
| 202.93 | 202.52 | 202.19 | 105.22 | 102.94 | 105.60 |
| 203.12 | 202.85 | 202.57 | 105.63 | 104.59 | 105.95 |
| 203.72 | 203.08 | 202.71 | 106.29 | 105.21 | 106.50 |
| 203.83 | 203.74 | 203.41 | 106.57 | 105.71 | 106.54 |
| 204.26 | 203.79 | 203.50 | 106.86 | 106.18 | 107.37 |
| 205.16 | 204.36 | 204.19 | 107.40 | 106.77 | 108.30 |
| 205.99 | 205.34 | 205.03 | 109.06 | 106.86 | 109.50 |
| 206.28 | 205.68 | 205.59 | 109.20 | 107.78 | 109.84 |
| 207.79 | 205.99 | 205.63 | 109.61 | 108.93 | 110.84 |
| 210.57 | 207.85 | 207.69 | 110.66 | 109.33 | 111.27 |
| 210.71 | 210.56 | 210.42 | 111.84 | 109.54 | 112.04 |
| 211.26 | 210.76 | 210.60 | 112.48 | 110.64 | 112.92 |
| 211.55 | 211.31 | 211.13 | 112.76 | 111.31 | 113.43 |
| 212.16 | 211.92 | 211.67 | 113.52 | 111.79 | 113.68 |
| 212.96 | 212.18 | 211.82 | 113.86 | 112.80 | 114.37 |
| 214.97 | 212.49 | 212.40 | 114.34 | 112.94 | 114.45 |
| 215.18 | 214.96 | 214.75 | 114.63 | 113.80 | 114.77 |
| 215.68 | 215.06 | 214.89 | 114.78 | 114.10 | 115.06 |
| 216.20 | 215.47 | 215.35 | 115.04 | 114.34 | 115.10 |
| 216.63 | 215.95 | 215.52 | 115.16 | 114.63 | 115.46 |
| 218.39 | 216.42 | 216.34 | 115.53 | 114.82 | 115.74 |
| 219.52 | 218.01 | 218.03 | 115.80 | 115.18 | 116.19 |
| 220.23 | 219.11 | 218.91 | 116.18 | 115.45 | 116.29 |
| 221.09 | 219.97 | 219.76 | 116.88 | 115.54 | 117.12 |
| 223.50 | 220.19 | 219.85 | 118.00 | 116.16 | 118.22 |
| 223.70 | 223.34 | 222.94 | 118.26 | 116.36 | 118.39 |
| 224.73 | 223.45 | 223.18 | 119.00 | 117.30 | 119.65 |
| 224.83 | 224.67 | 224.27 | 119.61 | 118.19 | 120.14 |
| 225.40 | 224.72 | 224.50 | 120.44 | 118.30 | 120.79 |
| 225.55 | 225.30 | 225.05 | 121.17 | 119.64 | 121.92 |
| 226.98 | 225.38 | 225.14 | 121.79 | 120.07 | 122.12 |
| 227.70 | 226.65 | 226.29 | 122.23 | 121.48 | 122.25 |

---

---

|        |        |        |        |        |        |
|--------|--------|--------|--------|--------|--------|
| 227.81 | 227.78 | 227.71 | 122.42 | 121.58 | 122.62 |
| 229.43 | 227.82 | 227.84 | 122.61 | 122.09 | 122.63 |
| 229.89 | 229.53 | 229.06 | 122.88 | 122.15 | 123.00 |
| 232.48 | 229.79 | 229.48 | 122.94 | 122.50 | 123.23 |
| 233.26 | 232.51 | 232.35 | 123.08 | 122.62 | 123.73 |
| 234.00 | 233.15 | 232.83 | 123.91 | 122.95 | 123.89 |
| 234.29 | 233.88 | 233.63 | 124.14 | 123.13 | 124.14 |
| 234.96 | 234.28 | 233.95 | 124.27 | 123.46 | 124.32 |
| 235.92 | 234.65 | 234.32 | 124.45 | 123.64 | 124.50 |
| 238.71 | 235.64 | 235.37 | 125.01 | 124.04 | 125.17 |
| 240.53 | 238.62 | 238.47 | 125.33 | 124.20 | 125.63 |
| 241.71 | 240.43 | 240.05 | 125.83 | 124.33 | 125.93 |
| 242.01 | 241.10 | 240.78 | 126.13 | 125.10 | 126.17 |
| 243.22 | 241.95 | 241.66 | 126.33 | 125.55 | 126.37 |
| 245.99 | 243.28 | 242.45 | 126.78 | 125.99 | 127.24 |
| 246.17 | 245.80 | 245.24 | 127.52 | 126.25 | 127.71 |
| 246.82 | 246.13 | 245.59 | 127.82 | 126.35 | 127.98 |
| 247.14 | 246.71 | 245.85 | 128.21 | 127.37 | 128.35 |
| 248.92 | 247.10 | 246.50 | 129.08 | 127.66 | 129.11 |
| 249.00 | 248.76 | 248.11 | 129.38 | 127.91 | 129.68 |
| 249.52 | 249.07 | 248.51 | 129.91 | 128.36 | 130.08 |
| 249.60 | 249.54 | 248.80 | 130.01 | 129.09 | 130.35 |
| 249.97 | 249.67 | 248.91 | 130.26 | 129.72 | 130.73 |
| 250.31 | 249.99 | 249.42 | 131.45 | 130.14 | 131.77 |
| 250.64 | 250.30 | 249.53 | 132.35 | 130.27 | 132.18 |
| 250.95 | 250.57 | 249.94 | 132.85 | 130.73 | 132.77 |
| 251.25 | 251.08 | 250.22 | 133.51 | 131.56 | 133.33 |
| 251.70 | 251.29 | 250.99 | 133.81 | 132.48 | 133.75 |
| 252.25 | 251.89 | 251.15 | 134.07 | 132.79 | 134.21 |
| 252.36 | 252.11 | 251.34 | 134.52 | 133.34 | 134.47 |
| 253.09 | 252.64 | 251.56 | 135.45 | 133.91 | 135.11 |
| 253.60 | 252.83 | 252.25 | 136.08 | 134.15 | 135.93 |
| 253.75 | 253.49 | 252.87 | 136.35 | 134.56 | 136.33 |
| 255.18 | 253.63 | 253.02 | 136.61 | 135.30 | 136.74 |
| 256.03 | 255.01 | 254.28 | 137.07 | 135.90 | 136.96 |
| 256.38 | 255.88 | 255.44 | 137.31 | 136.24 | 137.52 |
| 256.44 | 256.36 | 256.01 | 137.84 | 136.68 | 137.72 |
| 256.96 | 256.41 | 256.09 | 138.35 | 136.75 | 137.98 |
| 257.62 | 256.80 | 256.14 | 138.49 | 137.63 | 138.40 |
| 258.04 | 257.49 | 257.02 | 138.90 | 137.81 | 138.61 |
| 258.58 | 257.58 | 257.17 | 139.03 | 138.17 | 138.94 |
| 259.90 | 258.45 | 257.77 | 139.91 | 138.51 | 139.10 |
| 265.46 | 259.73 | 259.16 | 140.55 | 138.72 | 140.19 |
| 266.19 | 265.45 | 265.20 | 141.13 | 139.08 | 140.67 |

---

|            |         |          |         |        |        |        |
|------------|---------|----------|---------|--------|--------|--------|
|            | 470.49  | 266.12   | 265.73  | 141.32 | 140.45 | 140.84 |
|            | 621.41  | 332.92   | 349.42  | 141.57 | 140.79 | 140.99 |
|            | 879.56  | 369.77   | 526.97  | 142.01 | 140.96 | 141.65 |
|            | 3573.83 | 3584.38  | 3535.05 | 142.41 | 141.12 | 142.07 |
| Ta/Cu(553) | 19.11   | -1861.26 | 19.01   | 143.03 | 141.79 | 142.58 |
|            | 22.39   | 22.37    | 20.60   | 143.67 | 142.14 | 143.32 |
|            | 31.79   | 31.94    | 22.29   | 143.99 | 142.76 | 143.67 |
|            | 39.01   | 39.40    | 32.05   | 144.95 | 143.29 | 144.09 |
|            | 44.16   | 44.74    | 39.55   | 145.39 | 143.84 | 145.04 |
|            | 45.44   | 45.70    | 43.32   | 145.93 | 144.63 | 145.43 |
|            | 52.30   | 52.30    | 45.76   | 146.10 | 145.14 | 145.96 |
|            | 53.44   | 53.36    | 52.51   | 146.56 | 145.33 | 146.55 |
|            | 55.64   | 56.75    | 53.33   | 146.71 | 145.90 | 146.82 |
|            | 58.59   | 58.60    | 54.84   | 147.44 | 146.54 | 146.87 |
|            | 59.73   | 59.54    | 57.78   | 147.63 | 147.03 | 147.40 |
|            | 62.50   | 62.63    | 58.92   | 147.79 | 147.05 | 147.63 |
|            | 63.02   | 62.85    | 60.15   | 148.01 | 147.54 | 147.66 |
|            | 64.45   | 64.54    | 62.81   | 148.20 | 147.77 | 147.78 |
|            | 65.49   | 65.72    | 64.77   | 148.36 | 147.81 | 147.91 |
|            | 66.63   | 66.72    | 64.86   | 148.67 | 148.07 | 148.34 |
|            | 67.40   | 67.44    | 66.70   | 148.82 | 148.18 | 148.58 |
|            | 68.64   | 68.97    | 67.13   | 149.18 | 148.46 | 148.79 |
|            | 71.29   | 71.32    | 68.51   | 149.41 | 148.69 | 149.34 |
|            | 71.43   | 71.45    | 70.99   | 149.88 | 148.78 | 149.49 |
|            | 71.46   | 71.60    | 71.02   | 149.91 | 149.33 | 149.59 |
|            | 71.98   | 72.15    | 71.46   | 150.36 | 149.54 | 149.84 |
|            | 73.73   | 74.08    | 71.73   | 150.80 | 149.72 | 149.89 |
|            | 75.70   | 75.76    | 72.23   | 151.24 | 149.99 | 151.17 |
|            | 77.53   | 77.85    | 74.34   | 151.53 | 150.11 | 151.49 |
|            | 78.06   | 77.94    | 77.22   | 152.03 | 151.18 | 151.64 |
|            | 78.48   | 78.56    | 77.62   | 152.07 | 151.52 | 151.75 |
|            | 78.61   | 78.64    | 77.86   | 152.28 | 151.62 | 151.95 |
|            | 82.20   | 82.33    | 78.55   | 152.30 | 151.93 | 152.20 |
|            | 83.17   | 83.03    | 79.04   | 152.93 | 151.99 | 152.49 |
|            | 83.93   | 83.94    | 82.32   | 153.16 | 152.26 | 152.72 |
|            | 84.22   | 84.34    | 83.79   | 153.50 | 152.47 | 152.82 |
|            | 85.03   | 85.15    | 84.25   | 154.60 | 152.75 | 153.88 |
|            | 86.61   | 86.60    | 84.53   | 154.88 | 152.94 | 154.70 |
|            | 87.20   | 87.22    | 85.34   | 155.68 | 154.17 | 155.19 |
|            | 88.19   | 88.06    | 86.92   | 157.00 | 154.76 | 155.98 |
|            | 90.47   | 91.10    | 87.15   | 157.30 | 155.17 | 156.73 |
|            | 91.18   | 91.39    | 88.24   | 157.42 | 155.80 | 157.21 |
|            | 92.20   | 92.14    | 91.15   | 157.80 | 156.69 | 157.63 |
|            | 93.08   | 93.52    | 91.39   | 157.98 | 157.18 | 157.78 |

---

|        |        |        |        |        |        |
|--------|--------|--------|--------|--------|--------|
| 93.71  | 94.03  | 92.58  | 158.16 | 157.62 | 157.90 |
| 94.14  | 94.31  | 93.73  | 158.82 | 157.78 | 158.93 |
| 95.79  | 95.74  | 94.10  | 159.22 | 158.02 | 159.08 |
| 96.12  | 96.34  | 94.64  | 159.38 | 158.78 | 159.14 |
| 97.28  | 97.41  | 95.87  | 159.96 | 158.98 | 159.19 |
| 97.79  | 98.00  | 96.73  | 160.31 | 159.14 | 159.81 |
| 98.05  | 98.14  | 97.30  | 160.79 | 159.24 | 160.22 |
| 98.35  | 98.53  | 98.14  | 161.06 | 159.70 | 160.62 |
| 98.87  | 98.69  | 98.26  | 161.44 | 160.12 | 160.66 |
| 99.66  | 99.70  | 98.66  | 161.57 | 160.52 | 161.04 |
| 99.84  | 99.96  | 99.21  | 161.97 | 160.66 | 161.29 |
| 99.91  | 100.19 | 99.87  | 163.33 | 161.25 | 162.06 |
| 100.31 | 100.47 | 99.89  | 163.53 | 161.72 | 163.17 |
| 100.92 | 100.85 | 100.18 | 163.61 | 162.14 | 163.55 |
| 101.48 | 101.70 | 100.47 | 163.82 | 163.28 | 163.63 |
| 102.19 | 102.31 | 100.89 | 164.29 | 163.52 | 163.85 |
| 102.39 | 102.70 | 101.91 | 164.73 | 163.64 | 164.10 |
| 102.72 | 102.79 | 102.16 | 164.92 | 163.73 | 164.69 |
| 102.85 | 103.08 | 102.50 | 166.00 | 164.03 | 164.76 |
| 103.27 | 103.34 | 102.75 | 166.54 | 164.59 | 166.01 |
| 103.81 | 103.70 | 102.94 | 166.96 | 164.86 | 166.74 |
| 104.40 | 104.15 | 103.39 | 167.40 | 165.89 | 166.95 |
| 104.61 | 104.53 | 103.59 | 167.63 | 166.57 | 167.09 |
| 105.23 | 105.25 | 104.14 | 167.84 | 166.87 | 167.30 |
| 105.94 | 105.96 | 104.42 | 168.98 | 167.36 | 167.52 |
| 106.74 | 106.89 | 105.27 | 169.58 | 167.41 | 168.47 |
| 107.09 | 107.15 | 105.97 | 170.10 | 167.59 | 169.21 |
| 107.40 | 107.40 | 106.49 | 170.39 | 168.50 | 170.58 |
| 108.61 | 108.65 | 107.09 | 170.76 | 169.21 | 170.66 |
| 109.08 | 108.70 | 107.27 | 171.42 | 170.52 | 170.94 |
| 109.47 | 109.12 | 108.35 | 172.24 | 170.64 | 171.81 |
| 111.47 | 111.52 | 108.75 | 173.31 | 170.88 | 172.93 |
| 112.21 | 112.08 | 109.45 | 174.20 | 171.75 | 173.25 |
| 112.52 | 112.34 | 111.53 | 174.69 | 172.80 | 174.36 |
| 113.26 | 113.30 | 112.15 | 175.21 | 173.28 | 174.65 |
| 113.75 | 113.67 | 112.47 | 176.26 | 174.06 | 175.16 |
| 114.23 | 113.84 | 112.85 | 177.09 | 174.77 | 176.73 |
| 114.73 | 114.42 | 113.72 | 177.24 | 175.54 | 176.93 |
| 115.15 | 115.00 | 114.14 | 177.92 | 176.64 | 177.46 |
| 115.65 | 115.17 | 114.52 | 178.40 | 176.87 | 177.75 |
| 116.17 | 115.71 | 114.80 | 180.33 | 177.48 | 178.46 |
| 116.51 | 116.41 | 115.50 | 181.40 | 177.73 | 180.04 |
| 116.59 | 116.56 | 115.95 | 181.47 | 178.56 | 180.59 |
| 117.12 | 117.22 | 116.23 | 182.84 | 180.00 | 182.47 |

---

---

|        |        |        |        |        |        |
|--------|--------|--------|--------|--------|--------|
| 117.48 | 117.38 | 116.31 | 183.29 | 180.55 | 183.05 |
| 117.57 | 117.52 | 116.72 | 183.57 | 182.50 | 183.21 |
| 117.80 | 117.71 | 116.95 | 183.98 | 183.33 | 183.35 |
| 118.16 | 117.77 | 117.19 | 184.97 | 183.41 | 184.46 |
| 118.81 | 118.74 | 117.32 | 185.12 | 183.50 | 185.03 |
| 119.39 | 118.90 | 117.76 | 185.48 | 184.67 | 185.17 |
| 119.71 | 119.53 | 118.40 | 186.32 | 185.31 | 185.34 |
| 120.44 | 120.41 | 118.88 | 187.51 | 185.34 | 186.24 |
| 121.21 | 121.07 | 119.41 | 187.77 | 185.55 | 187.63 |
| 122.47 | 122.07 | 120.26 | 187.97 | 186.33 | 187.77 |
| 123.03 | 122.76 | 120.95 | 188.80 | 187.86 | 188.71 |
| 123.07 | 122.99 | 121.60 | 189.07 | 188.01 | 189.08 |
| 123.35 | 123.21 | 122.40 | 189.84 | 188.73 | 189.16 |
| 123.71 | 123.67 | 122.70 | 189.99 | 189.08 | 189.83 |
| 124.10 | 123.75 | 123.16 | 190.46 | 189.30 | 189.98 |
| 124.31 | 123.94 | 123.46 | 191.16 | 189.65 | 190.34 |
| 124.73 | 124.45 | 123.55 | 191.69 | 189.75 | 191.26 |
| 125.29 | 124.80 | 123.97 | 192.89 | 190.25 | 191.41 |
| 125.47 | 125.27 | 124.46 | 193.37 | 191.37 | 192.77 |
| 125.75 | 125.72 | 124.59 | 193.61 | 191.46 | 193.36 |
| 126.43 | 125.94 | 125.23 | 194.52 | 192.98 | 193.78 |
| 126.76 | 126.50 | 125.39 | 197.12 | 193.17 | 193.92 |
| 127.15 | 126.94 | 125.59 | 197.26 | 193.80 | 196.79 |
| 127.27 | 127.19 | 126.38 | 197.65 | 194.05 | 197.14 |
| 128.24 | 127.47 | 126.66 | 198.32 | 196.82 | 197.24 |
| 129.02 | 128.76 | 127.12 | 199.45 | 197.14 | 199.28 |
| 129.17 | 129.04 | 127.37 | 200.95 | 197.22 | 200.97 |
| 129.42 | 129.48 | 128.53 | 201.92 | 199.54 | 201.86 |
| 130.04 | 129.64 | 128.91 | 202.53 | 200.86 | 202.16 |
| 130.39 | 129.73 | 129.02 | 202.75 | 201.95 | 202.58 |
| 130.82 | 130.77 | 129.26 | 203.14 | 202.30 | 202.82 |
| 131.34 | 131.13 | 130.53 | 203.97 | 202.42 | 203.06 |
| 133.07 | 131.37 | 130.77 | 204.35 | 203.06 | 204.14 |
| 133.38 | 132.83 | 130.85 | 204.67 | 203.31 | 204.34 |
| 133.93 | 133.48 | 131.56 | 205.83 | 204.38 | 204.96 |
| 134.72 | 133.93 | 132.31 | 206.47 | 204.54 | 205.54 |
| 135.23 | 134.74 | 133.25 | 207.26 | 204.82 | 206.26 |
| 135.31 | 135.05 | 133.46 | 207.68 | 205.39 | 207.38 |
| 135.57 | 135.41 | 134.70 | 210.16 | 206.04 | 210.05 |
| 136.05 | 135.58 | 135.15 | 210.55 | 207.08 | 210.81 |
| 136.29 | 136.08 | 135.37 | 210.94 | 210.05 | 210.90 |
| 136.85 | 136.45 | 135.78 | 211.43 | 210.69 | 211.47 |
| 137.54 | 136.80 | 136.04 | 213.01 | 210.78 | 211.84 |
| 138.73 | 137.56 | 136.72 | 213.29 | 211.47 | 213.28 |

---

---

|        |        |        |        |        |        |
|--------|--------|--------|--------|--------|--------|
| 138.96 | 138.75 | 136.91 | 214.60 | 211.61 | 214.61 |
| 139.43 | 139.29 | 137.32 | 215.52 | 213.35 | 214.93 |
| 139.66 | 139.63 | 138.88 | 215.95 | 214.45 | 215.60 |
| 140.45 | 140.07 | 139.02 | 216.45 | 214.85 | 216.00 |
| 141.35 | 140.27 | 139.23 | 217.20 | 215.81 | 216.62 |
| 141.44 | 141.15 | 139.70 | 218.33 | 215.87 | 217.39 |
| 142.09 | 141.52 | 140.04 | 219.58 | 216.46 | 218.20 |
| 142.21 | 142.01 | 141.31 | 220.54 | 217.11 | 220.03 |
| 142.60 | 142.27 | 141.56 | 222.33 | 217.86 | 220.98 |
| 143.36 | 142.50 | 141.92 | 223.89 | 220.26 | 223.80 |
| 143.61 | 142.74 | 142.15 | 224.52 | 221.24 | 224.36 |
| 144.36 | 144.07 | 142.55 | 225.05 | 223.88 | 224.57 |
| 144.54 | 144.14 | 143.46 | 225.35 | 224.44 | 225.22 |
| 145.04 | 144.48 | 143.62 | 225.65 | 224.80 | 225.72 |
| 145.07 | 145.17 | 144.24 | 226.49 | 225.01 | 226.29 |
| 145.59 | 145.21 | 144.44 | 226.81 | 225.79 | 226.45 |
| 145.66 | 145.42 | 144.94 | 227.81 | 226.34 | 227.44 |
| 146.35 | 145.85 | 145.10 | 227.96 | 226.56 | 227.59 |
| 146.69 | 145.99 | 145.57 | 229.12 | 227.14 | 228.68 |
| 147.66 | 146.37 | 145.77 | 230.69 | 227.41 | 229.21 |
| 148.05 | 147.58 | 145.99 | 231.85 | 229.08 | 231.25 |
| 148.73 | 148.09 | 146.79 | 233.00 | 229.20 | 232.46 |
| 148.84 | 148.71 | 147.97 | 233.78 | 231.56 | 232.64 |
| 149.21 | 148.94 | 148.59 | 234.52 | 232.62 | 233.39 |
| 149.30 | 149.19 | 148.78 | 235.39 | 232.97 | 234.17 |
| 149.56 | 149.42 | 148.93 | 237.82 | 233.52 | 237.53 |
| 150.70 | 149.71 | 149.13 | 238.61 | 234.06 | 238.10 |
| 151.35 | 150.92 | 149.35 | 240.73 | 237.57 | 239.76 |
| 151.69 | 151.10 | 149.59 | 241.98 | 238.15 | 241.39 |
| 152.05 | 151.88 | 150.66 | 242.14 | 239.86 | 241.75 |
| 152.16 | 152.01 | 151.43 | 243.49 | 241.05 | 242.15 |
| 152.65 | 152.10 | 151.87 | 245.17 | 241.96 | 244.79 |
| 152.74 | 152.37 | 151.90 | 245.77 | 242.12 | 246.11 |
| 152.99 | 152.55 | 152.04 | 246.83 | 245.21 | 246.72 |
| 153.36 | 153.28 | 152.16 | 247.49 | 246.36 | 246.99 |
| 153.69 | 153.49 | 152.97 | 247.78 | 246.54 | 247.46 |
| 154.17 | 153.74 | 153.09 | 249.06 | 247.33 | 248.97 |
| 154.84 | 154.19 | 153.27 | 249.27 | 247.56 | 249.08 |
| 155.00 | 154.82 | 153.94 | 249.39 | 249.39 | 249.98 |
| 155.28 | 155.14 | 154.24 | 250.48 | 249.50 | 250.25 |
| 155.67 | 155.25 | 154.85 | 250.69 | 249.92 | 250.87 |
| 155.74 | 155.48 | 154.97 | 250.93 | 250.21 | 250.94 |
| 156.14 | 155.65 | 155.40 | 251.31 | 250.87 | 251.20 |
| 156.36 | 155.82 | 155.46 | 251.83 | 251.15 | 251.56 |

---



---

|        |        |        |           |         |          |         |
|--------|--------|--------|-----------|---------|----------|---------|
| 156.57 | 156.28 | 155.73 |           | 252.31  | 251.37   | 251.87  |
| 156.92 | 156.52 | 156.01 |           | 253.48  | 251.92   | 253.23  |
| 157.13 | 156.68 | 156.17 |           | 253.80  | 252.18   | 253.75  |
| 157.76 | 157.34 | 156.44 |           | 254.25  | 253.56   | 254.06  |
| 158.15 | 157.46 | 156.88 |           | 254.99  | 254.07   | 254.59  |
| 158.53 | 157.99 | 157.18 |           | 255.40  | 254.33   | 254.95  |
| 159.03 | 158.29 | 157.69 |           | 256.54  | 254.84   | 255.67  |
| 159.55 | 158.73 | 158.02 |           | 257.01  | 255.34   | 256.62  |
| 160.09 | 159.63 | 158.38 |           | 257.19  | 256.32   | 256.73  |
| 160.52 | 159.78 | 158.92 |           | 257.40  | 256.84   | 256.88  |
| 160.71 | 160.23 | 159.18 |           | 257.83  | 256.96   | 257.74  |
| 160.98 | 160.72 | 159.84 |           | 258.24  | 257.17   | 258.02  |
| 161.47 | 161.06 | 160.69 |           | 258.60  | 258.17   | 258.39  |
| 161.75 | 161.19 | 160.90 |           | 259.57  | 258.27   | 259.42  |
| 161.85 | 161.75 | 160.94 |           | 261.99  | 258.65   | 261.55  |
| 162.33 | 161.83 | 161.60 |           | 266.41  | 259.16   | 265.51  |
| 162.98 | 162.20 | 161.72 |           | 267.88  | 261.90   | 266.45  |
| 163.25 | 163.06 | 161.93 |           | 442.50  | 266.20   | 285.97  |
| 163.49 | 163.16 | 162.43 |           | 445.24  | 267.19   | 447.27  |
| 163.84 | 163.47 | 162.98 |           | 547.25  | 386.19   | 472.83  |
| 164.35 | 164.21 | 163.19 |           | 565.38  | 642.73   | 1088.67 |
| 164.53 | 164.51 | 163.94 |           | 3531.71 | 3438.40  | 3515.71 |
| 164.91 | 164.57 | 164.08 | W/Cu(553) | 11.60   | -1125.42 | 11.42   |
| 165.45 | 164.66 | 164.42 |           | 23.67   | 23.75    | 23.90   |
| 165.63 | 165.67 | 164.48 |           | 30.24   | 30.23    | 30.11   |
| 166.21 | 165.70 | 165.32 |           | 39.22   | 39.26    | 34.04   |
| 166.37 | 166.37 | 165.57 |           | 42.38   | 42.82    | 39.70   |
| 166.71 | 166.49 | 166.17 |           | 44.14   | 44.57    | 42.24   |
| 167.06 | 166.60 | 166.31 |           | 45.23   | 45.38    | 44.69   |
| 167.87 | 167.00 | 166.60 |           | 50.70   | 50.68    | 45.26   |
| 168.13 | 167.64 | 166.65 |           | 51.31   | 51.54    | 50.63   |
| 168.50 | 168.20 | 167.38 |           | 53.44   | 53.79    | 51.36   |
| 169.38 | 168.64 | 168.23 |           | 56.58   | 56.55    | 52.96   |
| 169.70 | 169.35 | 168.51 |           | 57.52   | 57.56    | 53.60   |
| 169.86 | 169.72 | 168.99 |           | 61.36   | 61.68    | 56.90   |
| 170.02 | 169.77 | 169.46 |           | 63.20   | 63.00    | 58.37   |
| 170.74 | 170.02 | 169.68 |           | 63.83   | 63.76    | 62.99   |
| 170.81 | 170.46 | 169.80 |           | 64.43   | 64.48    | 63.54   |
| 171.97 | 170.63 | 170.33 |           | 65.61   | 65.68    | 64.12   |
| 173.15 | 172.74 | 170.53 |           | 66.38   | 66.41    | 65.08   |
| 174.48 | 173.77 | 172.55 |           | 66.74   | 66.77    | 65.64   |
| 175.37 | 174.19 | 173.40 |           | 67.72   | 67.63    | 66.72   |
| 175.86 | 175.23 | 173.64 |           | 68.14   | 68.31    | 67.36   |
| 176.95 | 176.63 | 175.10 |           | 68.62   | 68.71    | 67.54   |

---

---

|        |        |        |        |        |        |
|--------|--------|--------|--------|--------|--------|
| 178.10 | 177.89 | 176.26 | 70.29  | 70.40  | 68.55  |
| 178.74 | 178.15 | 177.78 | 71.22  | 71.08  | 68.72  |
| 179.00 | 178.82 | 178.00 | 72.26  | 72.39  | 70.37  |
| 180.09 | 179.96 | 178.85 | 73.17  | 73.01  | 71.16  |
| 180.85 | 180.49 | 179.52 | 73.52  | 73.44  | 72.19  |
| 181.57 | 181.57 | 180.15 | 73.88  | 73.87  | 72.97  |
| 181.97 | 182.00 | 181.33 | 77.42  | 77.54  | 73.37  |
| 182.96 | 182.17 | 181.90 | 79.48  | 79.52  | 73.83  |
| 183.19 | 183.35 | 182.08 | 79.90  | 79.79  | 75.14  |
| 184.16 | 183.88 | 183.00 | 80.83  | 80.61  | 78.90  |
| 185.61 | 185.32 | 183.74 | 81.94  | 82.14  | 79.73  |
| 185.91 | 185.81 | 185.21 | 82.65  | 82.55  | 80.87  |
| 186.15 | 186.51 | 185.77 | 83.02  | 83.05  | 81.24  |
| 187.08 | 187.01 | 186.18 | 83.88  | 83.99  | 82.53  |
| 187.52 | 187.39 | 186.66 | 84.68  | 84.62  | 82.96  |
| 187.74 | 187.79 | 187.18 | 87.82  | 87.76  | 83.01  |
| 188.24 | 188.22 | 187.44 | 88.00  | 88.42  | 84.58  |
| 188.59 | 188.56 | 188.11 | 89.02  | 89.56  | 84.62  |
| 189.27 | 189.34 | 188.36 | 91.00  | 91.17  | 87.57  |
| 189.77 | 189.58 | 188.93 | 91.27  | 91.47  | 89.40  |
| 190.54 | 190.33 | 189.38 | 91.45  | 91.57  | 90.28  |
| 190.83 | 190.72 | 190.09 | 91.93  | 92.07  | 90.95  |
| 191.99 | 192.04 | 190.38 | 92.51  | 92.69  | 91.27  |
| 192.27 | 192.24 | 191.84 | 93.90  | 93.54  | 91.56  |
| 193.00 | 192.46 | 191.95 | 94.30  | 94.20  | 92.10  |
| 193.39 | 193.19 | 192.23 | 94.61  | 94.75  | 92.44  |
| 193.71 | 193.64 | 193.01 | 94.82  | 94.96  | 93.64  |
| 193.88 | 193.67 | 193.37 | 95.63  | 95.67  | 94.46  |
| 194.61 | 194.01 | 193.43 | 95.80  | 95.91  | 94.72  |
| 195.27 | 194.36 | 193.70 | 96.15  | 96.44  | 94.95  |
| 197.81 | 197.83 | 194.33 | 96.70  | 96.70  | 95.78  |
| 197.97 | 198.01 | 197.69 | 97.06  | 97.20  | 95.83  |
| 198.41 | 198.41 | 197.79 | 97.19  | 97.24  | 96.65  |
| 198.99 | 198.79 | 198.15 | 97.65  | 97.50  | 96.84  |
| 199.75 | 199.61 | 198.50 | 97.94  | 97.79  | 97.18  |
| 200.26 | 200.12 | 199.59 | 98.00  | 98.23  | 97.33  |
| 200.59 | 200.25 | 199.85 | 98.52  | 98.47  | 97.58  |
| 201.67 | 201.59 | 199.96 | 98.98  | 99.07  | 98.28  |
| 202.11 | 201.98 | 201.22 | 99.29  | 99.37  | 98.33  |
| 203.18 | 202.91 | 201.70 | 99.39  | 99.55  | 98.59  |
| 203.32 | 203.19 | 202.83 | 100.38 | 100.37 | 98.80  |
| 204.00 | 203.83 | 203.02 | 100.42 | 100.45 | 99.25  |
| 204.23 | 204.05 | 203.73 | 100.89 | 100.95 | 99.80  |
| 205.59 | 205.35 | 203.94 | 102.24 | 102.45 | 100.15 |

---

---

|        |        |        |        |        |        |
|--------|--------|--------|--------|--------|--------|
| 205.96 | 205.83 | 205.26 | 103.92 | 104.25 | 100.58 |
| 206.14 | 206.07 | 205.40 | 105.09 | 105.12 | 101.49 |
| 206.70 | 206.34 | 205.75 | 105.43 | 105.78 | 102.23 |
| 207.31 | 207.09 | 206.32 | 105.71 | 105.88 | 104.23 |
| 207.44 | 207.40 | 206.82 | 105.97 | 105.98 | 104.85 |
| 208.90 | 209.11 | 207.18 | 106.32 | 106.56 | 105.07 |
| 209.22 | 209.12 | 208.50 | 106.70 | 106.70 | 105.98 |
| 209.97 | 209.53 | 208.53 | 107.14 | 107.34 | 106.16 |
| 213.04 | 212.87 | 209.03 | 107.55 | 107.59 | 106.80 |
| 213.47 | 213.38 | 212.65 | 107.74 | 108.37 | 107.37 |
| 214.69 | 214.76 | 213.35 | 108.92 | 109.28 | 107.51 |
| 215.22 | 215.32 | 214.41 | 109.44 | 109.68 | 107.69 |
| 215.89 | 215.89 | 214.75 | 109.95 | 109.76 | 108.38 |
| 216.15 | 216.09 | 215.16 | 110.57 | 110.83 | 109.27 |
| 216.58 | 216.20 | 215.47 | 111.08 | 111.17 | 109.84 |
| 218.33 | 216.82 | 215.82 | 111.46 | 111.59 | 110.09 |
| 218.95 | 217.63 | 216.45 | 111.64 | 111.74 | 111.14 |
| 219.87 | 219.55 | 217.07 | 112.16 | 112.32 | 111.38 |
| 220.30 | 219.97 | 219.54 | 112.81 | 113.23 | 111.47 |
| 222.40 | 222.47 | 219.84 | 113.47 | 113.51 | 111.73 |
| 223.69 | 223.94 | 222.23 | 113.89 | 113.76 | 112.09 |
| 224.77 | 224.82 | 223.64 | 114.36 | 114.66 | 113.34 |
| 225.06 | 225.36 | 224.51 | 115.18 | 115.13 | 113.68 |
| 225.49 | 225.64 | 224.83 | 115.46 | 115.44 | 113.87 |
| 227.31 | 227.40 | 225.15 | 115.74 | 115.80 | 114.75 |
| 227.69 | 227.74 | 227.01 | 115.93 | 115.93 | 115.26 |
| 229.58 | 229.49 | 227.32 | 116.08 | 116.16 | 115.39 |
| 229.90 | 229.72 | 229.29 | 116.42 | 116.86 | 115.72 |
| 230.65 | 230.60 | 229.65 | 116.79 | 116.95 | 115.80 |
| 230.92 | 231.03 | 230.43 | 117.31 | 117.16 | 115.96 |
| 232.29 | 232.33 | 230.81 | 117.92 | 117.65 | 116.84 |
| 232.71 | 232.90 | 231.76 | 118.35 | 118.19 | 117.05 |
| 233.24 | 233.41 | 232.00 | 118.69 | 118.63 | 117.40 |
| 234.17 | 234.43 | 233.06 | 119.00 | 119.10 | 118.33 |
| 234.52 | 234.45 | 233.95 | 119.30 | 119.22 | 118.42 |
| 238.34 | 238.27 | 234.28 | 119.42 | 119.50 | 118.69 |
| 239.11 | 239.32 | 237.90 | 119.63 | 119.61 | 118.89 |
| 239.79 | 239.68 | 238.75 | 119.65 | 119.87 | 119.30 |
| 240.90 | 240.96 | 239.46 | 120.00 | 119.99 | 119.43 |
| 241.91 | 241.64 | 240.48 | 120.32 | 120.30 | 119.60 |
| 242.53 | 242.60 | 241.45 | 120.58 | 120.52 | 119.74 |
| 243.86 | 243.78 | 242.10 | 120.84 | 121.07 | 119.87 |
| 244.71 | 244.46 | 243.48 | 121.02 | 121.54 | 120.33 |
| 246.43 | 246.64 | 244.31 | 122.98 | 122.78 | 120.51 |

---

---

|         |         |         |        |        |        |
|---------|---------|---------|--------|--------|--------|
| 247.01  | 246.86  | 245.89  | 123.37 | 123.43 | 121.09 |
| 247.93  | 247.77  | 246.57  | 123.90 | 124.07 | 123.07 |
| 248.41  | 247.94  | 247.31  | 124.26 | 124.60 | 123.46 |
| 248.99  | 248.79  | 247.63  | 124.77 | 124.87 | 123.89 |
| 249.08  | 248.80  | 248.53  | 125.30 | 125.51 | 123.93 |
| 249.12  | 248.97  | 248.61  | 125.67 | 125.96 | 124.81 |
| 249.26  | 249.14  | 248.65  | 126.20 | 126.16 | 125.29 |
| 249.75  | 249.46  | 248.91  | 126.98 | 126.69 | 125.91 |
| 249.96  | 249.66  | 249.38  | 127.50 | 127.45 | 125.96 |
| 250.94  | 250.57  | 249.52  | 127.63 | 127.99 | 126.62 |
| 250.98  | 250.71  | 250.23  | 128.27 | 129.05 | 127.23 |
| 251.66  | 251.42  | 250.34  | 129.93 | 129.52 | 127.91 |
| 251.96  | 251.69  | 251.04  | 130.10 | 130.02 | 128.17 |
| 252.46  | 252.20  | 251.39  | 130.29 | 130.24 | 129.75 |
| 253.03  | 252.98  | 252.19  | 130.83 | 130.81 | 129.94 |
| 253.36  | 253.26  | 252.40  | 131.15 | 131.14 | 130.37 |
| 253.49  | 253.58  | 252.86  | 131.27 | 131.25 | 130.62 |
| 254.02  | 253.65  | 253.00  | 131.58 | 131.58 | 130.85 |
| 254.72  | 254.49  | 253.39  | 131.89 | 131.96 | 131.09 |
| 254.96  | 254.61  | 254.21  | 131.93 | 132.03 | 131.54 |
| 255.87  | 255.75  | 254.40  | 132.46 | 132.66 | 131.68 |
| 256.08  | 255.84  | 255.12  | 133.16 | 133.22 | 131.90 |
| 256.25  | 255.99  | 255.73  | 133.42 | 133.43 | 132.96 |
| 256.41  | 256.37  | 255.84  | 133.76 | 133.83 | 133.07 |
| 257.07  | 256.64  | 256.06  | 133.87 | 133.84 | 133.32 |
| 257.76  | 257.40  | 256.35  | 134.08 | 134.07 | 133.54 |
| 258.27  | 257.96  | 257.24  | 134.29 | 134.37 | 133.80 |
| 259.58  | 259.16  | 257.57  | 135.04 | 134.47 | 134.04 |
| 261.06  | 260.73  | 258.82  | 135.17 | 135.53 | 134.41 |
| 264.28  | 264.17  | 260.37  | 135.90 | 136.07 | 134.73 |
| 265.56  | 265.92  | 264.06  | 136.28 | 136.45 | 135.63 |
| 518.15  | 346.87  | 265.03  | 136.96 | 136.92 | 135.87 |
| 632.74  | 430.40  | 347.73  | 137.13 | 137.06 | 136.22 |
| 867.01  | 524.22  | 526.01  | 137.36 | 137.55 | 136.74 |
| 3613.89 | 3588.45 | 3508.17 | 137.79 | 137.72 | 137.04 |
|         |         |         | 137.98 | 137.89 | 137.26 |
|         |         |         | 138.58 | 138.05 | 137.55 |
|         |         |         | 138.84 | 138.71 | 137.77 |
|         |         |         | 139.27 | 139.14 | 138.00 |
|         |         |         | 139.46 | 139.34 | 138.43 |
|         |         |         | 139.75 | 139.79 | 138.92 |
|         |         |         | 140.32 | 140.07 | 139.11 |
|         |         |         | 140.72 | 140.65 | 139.33 |
|         |         |         | 140.92 | 141.12 | 140.46 |

---

---

|        |        |        |
|--------|--------|--------|
| 141.40 | 141.15 | 140.61 |
| 142.19 | 141.79 | 140.82 |
| 142.83 | 142.63 | 140.95 |
| 143.35 | 143.22 | 142.28 |
| 143.38 | 143.28 | 143.12 |
| 143.60 | 143.74 | 143.21 |
| 143.94 | 143.97 | 143.26 |
| 144.03 | 144.05 | 143.54 |
| 144.28 | 144.23 | 143.81 |
| 144.60 | 144.57 | 143.92 |
| 145.05 | 145.14 | 144.31 |
| 145.69 | 145.47 | 144.90 |
| 146.05 | 146.02 | 144.98 |
| 146.40 | 146.24 | 145.98 |
| 146.49 | 146.44 | 146.15 |
| 146.76 | 146.49 | 146.29 |
| 147.07 | 147.02 | 146.42 |
| 147.95 | 148.03 | 146.81 |
| 148.38 | 148.56 | 147.91 |
| 148.80 | 148.68 | 148.20 |
| 149.43 | 149.14 | 148.57 |
| 149.84 | 149.69 | 148.91 |
| 150.15 | 150.10 | 149.36 |
| 150.82 | 150.82 | 149.49 |
| 151.13 | 151.15 | 150.00 |
| 151.63 | 151.53 | 150.25 |
| 152.19 | 151.74 | 150.88 |
| 152.54 | 152.43 | 151.26 |
| 153.13 | 152.73 | 152.18 |
| 153.76 | 153.76 | 152.39 |
| 154.01 | 153.97 | 153.42 |
| 154.38 | 154.37 | 153.65 |
| 154.59 | 154.52 | 153.98 |
| 155.15 | 155.43 | 154.07 |
| 155.53 | 155.66 | 155.19 |
| 155.85 | 155.91 | 155.50 |
| 156.40 | 156.29 | 155.52 |
| 156.68 | 156.57 | 155.87 |
| 156.93 | 156.68 | 156.09 |
| 157.13 | 156.99 | 156.72 |
| 157.55 | 157.24 | 156.86 |
| 157.64 | 157.70 | 157.27 |
| 158.08 | 158.00 | 157.37 |
| 158.50 | 158.33 | 157.88 |

---

---

|        |        |        |
|--------|--------|--------|
| 158.62 | 158.77 | 158.03 |
| 159.44 | 159.31 | 158.43 |
| 159.87 | 159.62 | 158.89 |
| 160.03 | 159.83 | 159.09 |
| 160.34 | 160.01 | 159.46 |
| 160.85 | 160.58 | 160.10 |
| 160.91 | 160.75 | 160.52 |
| 161.30 | 160.96 | 160.63 |
| 161.92 | 161.54 | 160.86 |
| 162.20 | 162.08 | 160.92 |
| 163.69 | 163.41 | 161.87 |
| 164.08 | 163.70 | 163.47 |
| 164.67 | 164.41 | 163.85 |
| 165.17 | 164.75 | 164.09 |
| 166.22 | 166.04 | 164.82 |
| 166.66 | 166.51 | 166.05 |
| 168.45 | 167.33 | 166.53 |
| 168.64 | 168.58 | 167.98 |
| 169.89 | 168.72 | 168.49 |
| 170.79 | 169.94 | 169.57 |
| 171.28 | 171.24 | 170.37 |
| 172.19 | 171.99 | 170.74 |
| 172.53 | 172.38 | 171.57 |
| 173.02 | 172.78 | 172.32 |
| 173.10 | 172.98 | 172.57 |
| 174.10 | 173.83 | 172.78 |
| 174.71 | 174.50 | 173.63 |
| 174.80 | 174.64 | 174.31 |
| 175.31 | 175.07 | 174.64 |
| 175.71 | 175.40 | 175.03 |
| 176.52 | 175.75 | 175.42 |
| 178.65 | 178.51 | 176.24 |
| 178.94 | 178.63 | 178.23 |
| 179.31 | 179.00 | 178.46 |
| 179.40 | 179.29 | 178.85 |
| 179.73 | 179.46 | 178.95 |
| 179.94 | 179.83 | 179.44 |
| 181.24 | 181.27 | 179.89 |
| 181.45 | 181.43 | 180.95 |
| 182.45 | 182.23 | 181.07 |
| 182.73 | 182.71 | 182.03 |
| 184.50 | 183.99 | 182.33 |
| 185.49 | 185.19 | 183.92 |
| 185.99 | 185.51 | 184.83 |

---

---

|        |        |        |
|--------|--------|--------|
| 186.16 | 186.15 | 185.61 |
| 187.50 | 186.81 | 185.87 |
| 187.66 | 187.59 | 187.19 |
| 188.64 | 187.94 | 187.31 |
| 188.94 | 188.73 | 188.34 |
| 189.15 | 188.92 | 188.58 |
| 189.60 | 189.12 | 188.82 |
| 190.34 | 190.44 | 189.36 |
| 190.96 | 190.65 | 190.06 |
| 192.13 | 191.98 | 190.67 |
| 192.48 | 192.19 | 191.54 |
| 192.94 | 192.87 | 192.10 |
| 194.79 | 194.78 | 192.34 |
| 196.70 | 195.62 | 194.65 |
| 198.34 | 197.49 | 196.11 |
| 198.63 | 198.59 | 197.98 |
| 199.64 | 198.75 | 198.07 |
| 199.85 | 199.56 | 199.21 |
| 200.54 | 200.55 | 199.60 |
| 203.10 | 201.30 | 200.13 |
| 203.18 | 203.11 | 202.58 |
| 203.63 | 203.14 | 202.74 |
| 203.97 | 203.49 | 203.31 |
| 204.23 | 204.04 | 203.78 |
| 204.61 | 204.34 | 203.94 |
| 206.50 | 204.74 | 204.37 |
| 207.54 | 206.46 | 205.95 |
| 208.16 | 207.47 | 207.21 |
| 209.04 | 208.16 | 207.76 |
| 209.28 | 209.10 | 208.75 |
| 210.04 | 209.30 | 208.87 |
| 211.24 | 210.20 | 209.82 |
| 211.51 | 211.24 | 210.58 |
| 212.10 | 211.82 | 211.09 |
| 212.34 | 212.16 | 211.29 |
| 213.57 | 212.64 | 211.78 |
| 213.98 | 213.59 | 212.86 |
| 214.37 | 213.68 | 213.22 |
| 214.67 | 214.37 | 213.89 |
| 215.05 | 214.79 | 214.17 |
| 216.52 | 215.13 | 214.39 |
| 216.96 | 216.51 | 216.10 |
| 217.84 | 217.08 | 216.60 |
| 218.26 | 217.76 | 217.43 |

---

---

|        |        |        |
|--------|--------|--------|
| 218.57 | 218.40 | 217.75 |
| 220.04 | 218.47 | 218.06 |
| 220.69 | 220.60 | 219.22 |
| 221.22 | 220.79 | 220.15 |
| 222.29 | 221.22 | 220.44 |
| 222.30 | 222.25 | 222.16 |
| 224.49 | 222.41 | 222.23 |
| 225.50 | 224.62 | 223.52 |
| 226.16 | 225.01 | 224.05 |
| 227.39 | 226.30 | 225.72 |
| 228.38 | 227.96 | 226.83 |
| 228.54 | 228.31 | 227.80 |
| 229.08 | 228.67 | 228.17 |
| 231.76 | 229.30 | 228.83 |
| 233.11 | 231.65 | 231.25 |
| 234.90 | 233.19 | 232.90 |
| 235.95 | 234.91 | 234.01 |
| 237.86 | 235.63 | 234.97 |
| 239.22 | 237.93 | 237.51 |
| 241.96 | 239.13 | 238.43 |
| 242.00 | 241.68 | 241.22 |
| 243.09 | 241.88 | 241.51 |
| 243.33 | 242.95 | 242.36 |
| 244.87 | 243.21 | 242.63 |
| 244.90 | 244.85 | 243.99 |
| 245.38 | 244.97 | 244.49 |
| 245.61 | 245.24 | 244.61 |
| 245.94 | 245.44 | 244.87 |
| 246.12 | 245.72 | 245.29 |
| 246.29 | 245.86 | 245.46 |
| 246.63 | 245.95 | 245.67 |
| 246.91 | 246.49 | 245.83 |
| 247.12 | 246.78 | 246.35 |
| 247.19 | 246.95 | 246.52 |
| 247.26 | 247.08 | 246.72 |
| 247.86 | 247.16 | 246.82 |
| 248.24 | 247.79 | 247.30 |
| 248.43 | 248.26 | 247.57 |
| 248.95 | 248.49 | 247.83 |
| 249.47 | 248.81 | 248.36 |
| 250.89 | 249.09 | 248.52 |
| 250.93 | 250.90 | 250.28 |
| 251.34 | 251.01 | 250.58 |
| 252.41 | 251.07 | 250.66 |

---



---

|         |         |         |
|---------|---------|---------|
| 254.72  | 252.05  | 251.29  |
| 255.08  | 254.29  | 253.31  |
| 257.67  | 255.13  | 254.39  |
| 259.64  | 257.17  | 257.01  |
| 263.73  | 259.74  | 259.21  |
| 456.56  | 263.83  | 262.62  |
| 556.74  | 399.95  | 359.12  |
| 938.45  | 483.24  | 547.76  |
| 3627.22 | 3576.43 | 3517.11 |

---

**Table S11.** Gibbs free energy change of NORR on Cd/Cu(553) with solvation effect and dipole correction.

| Method                | *NO   | *HNO  | *HNOH | *H <sub>2</sub> NOH | *NH <sub>2</sub> | *NH <sub>3</sub> | NH <sub>3</sub> desorption |
|-----------------------|-------|-------|-------|---------------------|------------------|------------------|----------------------------|
| DFT                   | -0.43 | 0.00  | -0.91 | -0.31               | -0.96            | -1.58            | 0.15                       |
| DFT+solvation effect  | -0.38 | -0.15 | -0.98 | -0.50               | -0.79            | -1.50            | 0.16                       |
| DFT+dipole correction | -0.30 | -0.01 | -0.91 | -0.31               | -1.11            | -1.45            | 0.11                       |

**Table S12.** Optimal hyper-parameters of five different models.

| Model   | hyper-parameters                                                                                                                                                                                                                                                                                                                                                                                                                                                                                                                                                                                                                                                                                                    |
|---------|---------------------------------------------------------------------------------------------------------------------------------------------------------------------------------------------------------------------------------------------------------------------------------------------------------------------------------------------------------------------------------------------------------------------------------------------------------------------------------------------------------------------------------------------------------------------------------------------------------------------------------------------------------------------------------------------------------------------|
| KRR     | alpha=0.0013902870612802368,<br>degree=2,<br>gamma=0.36000000000000004,<br>kernel='rbf'                                                                                                                                                                                                                                                                                                                                                                                                                                                                                                                                                                                                                             |
| LASSO   | alpha=0.00010032248675910343, max_iter=350<br>C=7.471598965125458,                                                                                                                                                                                                                                                                                                                                                                                                                                                                                                                                                                                                                                                  |
| SVR     | degree=4,<br>epsilon=0.16000000000000003                                                                                                                                                                                                                                                                                                                                                                                                                                                                                                                                                                                                                                                                            |
| RFR     | max_depth=15,<br>n_estimators=40<br>base_score=None,<br>booster=None,<br>callbacks=None,<br>colsample_bylevel=None,<br>colsample_bynode=None,<br>colsample_bytree=0.8,<br>device=None,<br>early_stopping_rounds=None,<br>enable_categorical=False,<br>eval_metric=None,<br>feature_types=None,<br>gamma=0,<br>grow_policy=None,<br>importance_type=None,<br>interaction_constraints=None, learning_rate=0.3,<br>max_bin=None,<br>max_cat_threshold=None,<br>max_cat_to_onehot=None,<br>max_delta_step=None, max_depth=10,<br>max_leaves=None,<br>min_child_weight=5, missing=nan,<br>monotone_constraints=None,<br>multi_strategy=None, n_estimators=80,<br>n_jobs=32,<br>num_parallel_tree=None, random_state=None |
| XGBoost |                                                                                                                                                                                                                                                                                                                                                                                                                                                                                                                                                                                                                                                                                                                     |

**Table S13.** Parameters of MBTR.

| Function          | Parameters                                                                                                                                                                                 |
|-------------------|--------------------------------------------------------------------------------------------------------------------------------------------------------------------------------------------|
| species           | ["H", "O", "N", "Sc", "Ti", "V", "Cr", "Mn", "Fe", "Co", "Ni", "Cu", "Zn", "Y", "Zr", "Nb", "Mo", "Tc", "Ru", "Rh", "Pd", "Ag", "Cd", "Hf", "Ta", "W", "Re", "Os", "Ir", "Pt", "Au", "Hg"] |
| periodic geometry | True                                                                                                                                                                                       |
| grid              | {"function": "cosine"}                                                                                                                                                                     |
| weighting         | {'min': -1.0, 'max': 1.0, 'sigma': 0.1, 'n': 10}                                                                                                                                           |
| normalization     | {'function': 'exp', 'r_cut': 10, 'threshold': 1e-3}                                                                                                                                        |
| sparse            | 'valle_ogonov'                                                                                                                                                                             |
|                   | False                                                                                                                                                                                      |

## References

1. B. Delley, *The Journal of chemical physics*, 1990, **92**, 508-517.
2. B. Delley, *The Journal of chemical physics*, 2000, **113**, 7756-7764.
3. J. P. Perdew, K. Burke and M. Ernzerhof, *Physical Review Letters*, 1996, **77**, 3865-3868.
4. W. Kohn and L. J. Sham, *Physical Review*, 1965, **140**, A1133-A1138.
5. B. Hammer, L. B. Hansen and J. K. Nørskov, *Physical Review B*, 1999, **59**, 7413-7421.
6. S. Grimme, *J Comput Chem*, 2006, **27**, 1787-1799.
7. B. Delley, *Physical Review B*, 2002, **66**, 155125.
8. T. A. Halgren and W. N. Lipscomb, *Chemical Physics Letters*, 1977, **49**, 225-232.
9. Henkelman, Graeme, Uberuaga, P. Blas, Jónsson and Hannes, *Journal of Chemical Physics*, 2000.
10. J. K. Nørskov, J. Rossmeisl, A. Logadottir, L. Lindqvist, J. R. Kitchin, T. Bligaard and H. Jónsson, *The Journal of Physical Chemistry B*, 2004, **108**, 17886-17892.
11. C. Harris, K. Millman, S. van der Walt, R. Gommers, P. Virtanen, D. Cournapeau, E. Wieser, J. Taylor and S. Berg, *Kern R, Picus M, Hoyer S, van Kerkwijk MH, Brett M, Haldane A, del Rio JF, Wiebe M, Peterson P, G'erald-475 Marchant P, et al. Array programming with NumPy. Nature*, 2020, **585**, 357-362.
12. T. Pandas Development Team, *Pandas*, 2020.
13. F. Pedregosa, G. Varoquaux, A. Gramfort, V. Michel, B. Thirion, O. Grisel, M. Blondel, P. Prettenhofer, R. Weiss and V. Dubourg, *the Journal of machine Learning research*, 2011, **12**, 2825-2830.
14. S. Ramraj, N. Uzir, R. Sunil and S. Banerjee, *International Journal of Control Theory and Applications*, 2016, **9**, 651-662.

15. C. Chih-Chung and L. Chih-Jen, *Journal*, 2004.
16. K. P. Murphy, *Machine learning: a probabilistic perspective*, MIT press, 2012.
17. D. F. Schmidt and E. Makalic, 2017.
18. T. Hastie, R. Tibshirani, J. Friedman, T. Hastie, R. Tibshirani and J. Friedman, *The elements of statistical learning: Data mining, inference, and prediction*, 2009, 587-604.
19. P. Geurts, *Wehenkel L. Extremely randomized trees. Machine Learning*, 2006, **63**, 3-42.
20. T. Akiba, S. Sano, T. Yanase, T. Ohta and M. Koyama, 2019.
21. J. Sola and J. Sevilla, *IEEE Transactions on nuclear science*, 1997, **44**, 1464-1468.
22. R. Malhotra and S. Meena, 2021.
23. S. M. Lundberg and S.-I. Lee, *Advances in neural information processing systems*, 2017, **30**.
24. S. M. Lundberg, B. Nair, M. S. Vavilala, M. Horibe, M. J. Eisses, T. Adams, D. E. Liston, D. K.-W. Low, S.-F. Newman and J. Kim, *Nature biomedical engineering*, 2018, **2**, 749-760.
25. S. M. Lundberg, G. Erion, H. Chen, A. DeGrave, J. M. Prutkin, B. Nair, R. Katz, J. Himmelfarb, N. Bansal and S.-I. Lee, *Nature machine intelligence*, 2020, **2**, 56-67.
26. H. Huo and M. Rupp, 2017.
27. L. Himanen, M. O. J. Jäger, E. V. Morooka, F. Federici Canova, Y. S. Ranawat, D. Z. Gao, P. Rinke and A. S. Foster, *Computer Physics Communications*, 2020, **247**, 106949.
28. C. Ren, S. Lu, Y. Wu, Y. Ouyang, Y. Zhang, Q. Li, C. Ling and J. Wang, *Journal of the American Chemical Society*, 2022, **144**, 12874-12883.
